# Supplementary material for: Discovery of grey matter lesion-related immune genes for diagnostic prediction in multiple sclerosis
Source: PeerJ. 2023 Apr 26;11:e15299. doi: 10.7717/peerj.15299 (PMC10148642; doi:10.7717/peerj.15299)
Supplement: Supplemental Information 2 [file peerj-11-15299-s002.xlsx]

## Sheet: Table S1a
Table S1: Differentially Expressed Genes identified in GSE135511
Table S1a: Down-regulated DEGs in GSE135511
Gene.symbol	adj.P.Val	P.Value	t	B	logFC	Gene.title
FASTKD3	3.83e-05	9.74e-09	-9.12028	10.1509	-1.11048	FAST kinase domains 3
PSMG1	3.83e-05	1.42e-08	-8.91671	9.79787	-1.37495	proteasome assembly chaperone 1
ACADSB	5e-05	2.22e-08	-8.68194	9.38317	-1.05854	acyl-CoA dehydrogenase, short/branched chain
RWDD1	5e-05	2.39e-08	-8.64381	9.31505	-1.42555	RWD domain containing 1
SLC25A40	5.02e-05	3.55e-08	-8.43812	8.94388	-1.82929	solute carrier family 25 member 40
USP33	5.02e-05	3.59e-08	-8.4327	8.93401	-1.13318	ubiquitin specific peptidase 33
RCHY1	5.02e-05	4.02e-08	-8.37481	8.82835	-1.10607	ring finger and CHY zinc finger domain containing 1
NXPH1	5.02e-05	4.12e-08	-8.36203	8.80496	-1.10679	neurexophilin 1
TASP1	5.13e-05	5.18e-08	-8.24555	8.59066	-1.27005	taspase 1
TM2D3	0.000121	1.75e-07	-7.63793	7.43962	-1.34172	TM2 domain containing 3
PDCD10	0.000138	2.32e-07	-7.50065	7.17187	-1.26277	programmed cell death 10
NRG1	0.00014	2.61e-07	-7.44466	7.06187	-1.31679	neuregulin 1
HMGCLL1	0.000145	3.01e-07	-7.37663	6.92755	-1.25754	3-hydroxymethyl-3-methylglutaryl-CoA lyase like 1
DNAJC19	0.000145	3.23e-07	-7.34159	6.85811	-1.03139	DnaJ heat shock protein family (Hsp40) member C19
ENSA	0.000149	3.72e-07	-7.27441	6.72446	-1.41883	endosulfine alpha
RAD23B	0.000151	3.86e-07	-7.25772	6.69115	-1.21226	RAD23 homolog B, nucleotide excision repair protein
PRKACB	0.000156	4.36e-07	-7.19944	6.5745	-1.80709	protein kinase cAMP-activated catalytic subunit beta
GDAP1	0.000157	4.74e-07	-7.1595	6.49427	-1.89966	ganglioside induced differentiation associated protein 1
RRAGB	0.000157	4.92e-07	-7.14229	6.45962	-1.74974	Ras related GTP binding B
PSMG1	0.000162	5.61e-07	-7.08041	6.33472	-1.36015	proteasome assembly chaperone 1
TM6SF1	0.000171	6.32e-07	-7.02376	6.21985	-1.14221	transmembrane 6 superfamily member 1
RPS24	0.000236	1.08e-06	-6.77479	5.70953	-1.14351	ribosomal protein S24
RFC3	0.00026	1.26e-06	-6.70349	5.56173	-1.41305	replication factor C subunit 3
DLD	0.000275	1.36e-06	-6.66898	5.48994	-1.25196	dihydrolipoamide dehydrogenase
SCAMP1	0.000302	1.68e-06	-6.5703	5.28372	-1.45985	secretory carrier membrane protein 1
EEF1B2	0.000361	2.38e-06	-6.41334	4.95292	-1.42297	eukaryotic translation elongation factor 1 beta 2
FBXO9	0.000377	2.59e-06	-6.37545	4.87257	-1.71147	F-box protein 9
PCDH8	0.000382	2.68e-06	-6.35932	4.83829	-1.26445	protocadherin 8
RPL41	0.000385	2.73e-06	-6.35101	4.82062	-1.44365	ribosomal protein L41
CDC42	0.000385	2.81e-06	-6.33871	4.79444	-1.61761	cell division cycle 42
HTR5A	0.000421	3.28e-06	-6.26859	4.64488	-1.83876	5-hydroxytryptamine receptor 5A
DYNC2LI1	0.000429	3.4e-06	-6.25216	4.60973	-1.55824	dynein cytoplasmic 2 light intermediate chain 1
SCP2	0.000434	3.46e-06	-6.24398	4.59222	-1.13375	sterol carrier protein 2
ASAH1	0.00045	3.68e-06	-6.21629	4.5329	-1.22694	N-acylsphingosine amidohydrolase 1
PHYH	0.000487	4.14e-06	-6.16395	4.42047	-1.16092	phytanoyl-CoA 2-hydroxylase
NCOA2	0.000538	4.89e-06	-6.0902	4.26145	-1.32528	nuclear receptor coactivator 2
UBE2E3	0.000543	5.03e-06	-6.077	4.2329	-1.28039	ubiquitin conjugating enzyme E2 E3
CDC42SE2	0.000589	5.88e-06	-6.00783	4.08303	-1.21662	CDC42 small effector 2
PPM1A	0.000601	6.2e-06	-5.98473	4.03283	-1.18391	protein phosphatase, Mg2+/Mn2+ dependent 1A
RTN3	0.000602	6.27e-06	-5.97982	4.02215	-2.06487	reticulon 3
CCT6A	0.000603	6.31e-06	-5.97694	4.01589	-1.32164	chaperonin containing TCP1 subunit 6A
TRUB1	0.000606	6.47e-06	-5.96553	3.99107	-1.68155	TruB pseudouridine synthase family member 1
ELMO1	0.000615	6.74e-06	-5.94801	3.95293	-1.65988	engulfment and cell motility 1
USP14	0.000638	7.21e-06	-5.91828	3.8881	-1.28364	ubiquitin specific peptidase 14
CDC42EP3	0.000652	7.52e-06	-5.89944	3.84696	-1.03237	CDC42 effector protein 3
CCNDBP1	0.000668	7.81e-06	-5.88266	3.8103	-1.13975	cyclin D1 binding protein 1
C9orf72	0.000693	8.51e-06	-5.8452	3.72833	-1.17213	chromosome 9 open reading frame 72
CITED2	0.000725	9.25e-06	-5.80861	3.64808	-1.14622	Cbp/p300 interacting transactivator with Glu/Asp rich carboxy-terminal domain 2
TTC8	0.000725	9.28e-06	-5.8073	3.64521	-1.16211	tetratricopeptide repeat domain 8
NAA20	0.000729	9.78e-06	-5.78433	3.59475	-1.04669	N(alpha)-acetyltransferase 20, NatB catalytic subunit
SRPK2	0.000729	9.8e-06	-5.78323	3.59233	-1.21148	SRSF protein kinase 2
PPP1R2	0.000729	9.89e-06	-5.77907	3.58317	-1.09638	protein phosphatase 1 regulatory inhibitor subunit 2
TMEM70	0.000767	1.07e-05	-5.74601	3.51044	-1.05566	transmembrane protein 70
TOMM20	0.000789	1.13e-05	-5.72173	3.45694	-1.16438	translocase of outer mitochondrial membrane 20
MATR3	0.00079	1.13e-05	-5.71971	3.45249	-1.09348	matrin 3
ATP5C1	0.000793	1.15e-05	-5.71164	3.43469	-1.29025	ATP synthase, H+ transporting, mitochondrial F1 complex, gamma polypeptide 1
RTN1	0.000793	1.16e-05	-5.70995	3.43094	-1.24933	reticulon 1
HNRNPA1	0.000819	1.21e-05	-5.69137	3.38995	-1.37632	heterogeneous nuclear ribonucleoprotein A1
PHF14	0.000836	1.25e-05	-5.67616	3.35635	-1.25984	PHD finger protein 14
HS6ST2	0.000836	1.28e-05	-5.66676	3.33556	-1.24746	heparan sulfate 6-O-sulfotransferase 2
NCKAP1	0.000837	1.3e-05	-5.6596	3.31973	-1.46451	NCK associated protein 1
TAC1	0.000858	1.37e-05	-5.63863	3.27333	-2.56613	tachykinin precursor 1
CASD1	0.000882	1.43e-05	-5.61709	3.22562	-1.07063	CAS1 domain containing 1
FBXW7	0.000886	1.45e-05	-5.61367	3.21804	-1.5082	F-box and WD repeat domain containing 7
BTBD1	0.000897	1.51e-05	-5.59621	3.17931	-1.64086	BTB domain containing 1
GPR89B	0.000898	1.52e-05	-5.59269	3.1715	-1.20602	G protein-coupled receptor 89B
MAGED2	0.000902	1.53e-05	-5.58777	3.16058	-1.14316	MAGE family member D2
SULT1A1	0.000927	1.6e-05	-5.56928	3.11954	-1.04929	sulfotransferase family 1A member 1
LETMD1	0.000927	1.61e-05	-5.5674	3.11535	-1.21933	LETM1 domain containing 1
GCC2	0.000927	1.62e-05	-5.56401	3.10782	-1.01641	GRIP and coiled-coil domain containing 2
PIAS2	0.000982	1.86e-05	-5.50365	2.97351	-1.02406	protein inhibitor of activated STAT 2
RAN	0.000988	1.9e-05	-5.4956	2.95559	-1.10592	RAN, member RAS oncogene family
CIRBP	0.000988	1.92e-05	-5.49047	2.94415	-1.19889	cold inducible RNA binding protein
CNTN1	0.000988	1.94e-05	-5.48731	2.9371	-1.41354	contactin 1
CNTN1	0.00101	2e-05	-5.47234	2.90371	-1.32319	contactin 1
NUDT18	0.00104	2.13e-05	-5.44698	2.84711	-1.00698	nudix hydrolase 18
SERF1A	0.00104	2.16e-05	-5.43954	2.83047	-1.08519	small EDRK-rich factor 1A
RPH3A	0.00105	2.18e-05	-5.43596	2.82248	-1.03857	rabphilin 3A
EID2	0.00106	2.26e-05	-5.42001	2.78682	-1.26572	EP300 interacting inhibitor of differentiation 2
ATP6V1H	0.00113	2.5e-05	-5.37743	2.69151	-1.59691	ATPase H+ transporting V1 subunit H
RTN3	0.00114	2.53e-05	-5.37247	2.6804	-1.45885	reticulon 3
MAGED1	0.00115	2.58e-05	-5.36343	2.66016	-1.36757	MAGE family member D1
ELAVL2	0.00117	2.72e-05	-5.34149	2.61095	-1.5409	ELAV like neuron-specific RNA binding protein 2
AMACR	0.00125	3.07e-05	-5.2888	2.49263	-1.58813	alpha-methylacyl-CoA racemase
UQCRC2	0.00125	3.09e-05	-5.2856	2.48542	-1.11599	ubiquinol-cytochrome c reductase core protein II
Sep5	0.00126	3.14e-05	-5.2791	2.47081	-1.06688	septin 5
CACNB4	0.0013	3.31e-05	-5.25657	2.42013	-1.07602	calcium voltage-gated channel auxiliary subunit beta 4
KCNC2	0.00135	3.53e-05	-5.22871	2.35738	-1.58856	potassium voltage-gated channel subfamily C member 2
TRIM37	0.00136	3.55e-05	-5.22684	2.35315	-1.69904	tripartite motif containing 37
NMU	0.00137	3.62e-05	-5.21842	2.33419	-2.33188	neuromedin U
GOLT1A	0.00137	3.65e-05	-5.215	2.32647	-1.77373	golgi transport 1A
NETO1	0.00144	3.98e-05	-5.17795	2.24289	-1.66286	neuropilin and tolloid like 1
PGAM1	0.00144	4.02e-05	-5.17374	2.23339	-1.28001	phosphoglycerate mutase 1
SNX12	0.00147	4.17e-05	-5.15788	2.19758	-1.61886	sorting nexin 12
CHMP5	0.00148	4.27e-05	-5.14775	2.17469	-1.14166	charged multivesicular body protein 5
F8	0.00148	4.28e-05	-5.14719	2.17342	-1.00529	coagulation factor VIII
FAM3C	0.00148	4.33e-05	-5.14236	2.1625	-1.14106	family with sequence similarity 3 member C
SLC37A3	0.00149	4.37e-05	-5.13814	2.15297	-1.04852	solute carrier family 37 member 3
OSCP1	0.00155	4.74e-05	-5.10323	2.07403	-1.03283	organic solute carrier partner 1
ACP1	0.00156	4.8e-05	-5.09796	2.06209	-1.19574	acid phosphatase 1, soluble
CCNC	0.00156	4.82e-05	-5.09596	2.05756	-1.27741	cyclin C
MAP1B	0.00156	4.85e-05	-5.09388	2.05285	-2.17386	microtubule associated protein 1B
RNF38	0.00158	4.95e-05	-5.08473	2.03215	-1.13189	ring finger protein 38
MOB4	0.00158	4.99e-05	-5.08131	2.0244	-1.25482	MOB family member 4, phocein
CCNL2	0.00167	5.53e-05	-5.03771	1.9256	-1.51846	cyclin L2
PSMA1	0.00172	5.76e-05	-5.02033	1.88619	-1.34163	proteasome subunit alpha 1
PCGF6	0.00172	5.79e-05	-5.01819	1.88132	-1.08264	polycomb group ring finger 6
PSMC4	0.00174	5.89e-05	-5.01141	1.86594	-1.02287	proteasome 26S subunit, ATPase 4
DMXL2	0.00174	5.89e-05	-5.01116	1.86537	-1.14169	Dmx like 2
MYO5B	0.00175	5.96e-05	-5.00641	1.85458	-1.10428	myosin VB
PPCS	0.00179	6.24e-05	-4.98639	1.80914	-1.05337	phosphopantothenoylcysteine synthetase
CD47	0.0018	6.27e-05	-4.98495	1.80586	-1.09972	CD47 molecule
MAT2B	0.0018	6.34e-05	-4.98015	1.79498	-1.51528	methionine adenosyltransferase 2B
NRXN1	0.00183	6.5e-05	-4.96949	1.77076	-1.23056	neurexin 1
ANO5	0.00183	6.63e-05	-4.96091	1.75126	-1.16901	anoctamin 5
PCP4	0.00184	6.66e-05	-4.95914	1.74723	-1.21379	Purkinje cell protein 4
CHURC1	0.00188	6.93e-05	-4.94229	1.70894	-1.45409	churchill domain containing 1
TRIM23	0.00188	6.95e-05	-4.94128	1.70663	-1.03062	tripartite motif containing 23
ISCA1	0.00191	7.16e-05	-4.92843	1.67741	-1.03999	iron-sulfur cluster assembly 1
CNTN4	0.00196	7.43e-05	-4.91258	1.64136	-1.30188	contactin 4
DLGAP1	0.00199	7.61e-05	-4.9027	1.61887	-1.51499	DLG associated protein 1
BEX5	0.00199	7.7e-05	-4.89778	1.60768	-1.40533	brain expressed X-linked 5
TSPAN3	0.00201	7.78e-05	-4.8931	1.59702	-1.23389	tetraspanin 3
ASB3	0.00201	7.79e-05	-4.8925	1.59565	-1.06454	ankyrin repeat and SOCS box containing 3
GPM6A	0.00209	8.33e-05	-4.8645	1.53188	-1.52783	glycoprotein M6A
TRAPPC2B	0.00209	8.36e-05	-4.86305	1.5286	-1.0347	trafficking protein particle complex 2B
ZNF226	0.00211	8.45e-05	-4.85833	1.51784	-1.14922	zinc finger protein 226
GAD2	0.00214	8.66e-05	-4.84809	1.49449	-1.299	glutamate decarboxylase 2
UQCC1	0.00217	8.96e-05	-4.83343	1.4611	-1.15017	ubiquinol-cytochrome c reductase complex assembly factor 1
MOCS2	0.00218	9.02e-05	-4.83081	1.45512	-1.13776	molybdenum cofactor synthesis 2
DLX1	0.00221	9.26e-05	-4.81988	1.4302	-1.10458	distal-less homeobox 1
EIF5	0.00222	9.41e-05	-4.81288	1.41424	-1.01436	eukaryotic translation initiation factor 5
DLX1	0.00223	9.51e-05	-4.80844	1.4041	-1.07083	distal-less homeobox 1
SYNJ1	0.00234	0.000102	-4.77959	1.33829	-1.14484	synaptojanin 1
UBA3	0.00237	0.000104	-4.76898	1.31407	-1.00685	ubiquitin like modifier activating enzyme 3
MAGED2	0.00237	0.000105	-4.76731	1.31025	-1.19129	MAGE family member D2
MKKS	0.00241	0.000108	-4.75617	1.28482	-1.41975	McKusick-Kaufman syndrome
TCEAL6	0.00241	0.000108	-4.75381	1.27944	-1.08429	transcription elongation factor A like 6
SST	0.00243	0.00011	-4.74716	1.26426	-2.55205	somatostatin
DNAJB6	0.00248	0.000113	-4.73393	1.23403	-1.01432	DnaJ heat shock protein family (Hsp40) member B6
FAM3C	0.00253	0.000116	-4.72515	1.21398	-1.27292	family with sequence similarity 3 member C
ACOT1	0.00256	0.000118	-4.71661	1.19447	-1.26053	acyl-CoA thioesterase 1
MAEA	0.00265	0.000126	-4.68909	1.13159	-1.1919	macrophage erythroblast attacher
RPL6	0.00268	0.000129	-4.68101	1.11312	-1.12051	ribosomal protein L6
PRKAR1B	0.00276	0.000135	-4.65953	1.06401	-1.60039	protein kinase cAMP-dependent type I regulatory subunit beta
KCNIP4	0.00293	0.000149	-4.61897	0.97125	-1.49253	potassium voltage-gated channel interacting protein 4
CHM	0.00298	0.000155	-4.60264	0.93387	-1.16441	CHM, Rab escort protein 1
TMEM70	0.00303	0.000159	-4.5921	0.90976	-1.08854	transmembrane protein 70
CRYM	0.00303	0.000159	-4.59167	0.90877	-1.62213	crystallin mu
SYCE1	0.00305	0.000161	-4.58806	0.90051	-1.49627	synaptonemal complex central element protein 1
GET4	0.00311	0.000165	-4.57679	0.87471	-1.06378	golgi to ER traffic protein 4
FGF13	0.00333	0.000183	-4.53286	0.77413	-1.45919	fibroblast growth factor 13
CLCN4	0.00341	0.00019	-4.51668	0.73709	-1.05838	chloride voltage-gated channel 4
TCP1	0.00346	0.000195	-4.506	0.71263	-1.11564	t-complex 1
RIMS1	0.00353	0.000202	-4.49246	0.68161	-1.06612	regulating synaptic membrane exocytosis 1
C1QL3	0.00357	0.000206	-4.484	0.66224	-1.11768	complement C1q like 3
ASPH	0.00381	0.000228	-4.4402	0.5619	-1.26722	aspartate beta-hydroxylase
PNOC	0.00382	0.000229	-4.43821	0.55735	-1.53463	prepronociceptin
SLC32A1	0.00393	0.000239	-4.42128	0.51856	-1.57864	solute carrier family 32 member 1
ATP5S	0.00396	0.000242	-4.41533	0.50492	-1.21939	ATP synthase, H+ transporting, mitochondrial Fo complex subunit s (factor B)
TSC22D3	0.00397	0.000245	-4.40986	0.49239	-1.30656	TSC22 domain family member 3
SNAP25	0.00406	0.000257	-4.39025	0.44747	-1.57149	synaptosome associated protein 25
LRRC24	0.00409	0.000261	-4.38482	0.43502	-1.09317	leucine rich repeat containing 24
USP12	0.0042	0.000273	-4.36476	0.38906	-2.00336	ubiquitin specific peptidase 12
CTXN3	0.00438	0.000293	-4.33638	0.32405	-1.40206	cortexin 3
VIP	0.00443	0.000298	-4.32907	0.3073	-1.45522	vasoactive intestinal peptide
SNURF	0.00447	0.000302	-4.3233	0.29407	-1.1431	SNRPN upstream reading frame
RTN1	0.00452	0.000307	-4.31581	0.27692	-2.09329	reticulon 1
HK1	0.0047	0.000327	-4.28929	0.21618	-1.72266	hexokinase 1
SLC41A2	0.00471	0.000329	-4.28758	0.21225	-1.03943	solute carrier family 41 member 2
HSD11B1	0.00475	0.000335	-4.27951	0.19376	-1.21094	hydroxysteroid 11-beta dehydrogenase 1
GPR155	0.00488	0.000349	-4.26224	0.15422	-1.12435	G protein-coupled receptor 155
NEUROD6	0.00488	0.00035	-4.26166	0.15288	-1.47308	neuronal differentiation 6
CADPS	0.00515	0.00038	-4.22645	0.07228	-1.07405	calcium dependent secretion activator
RBM11	0.0053	0.000395	-4.21055	0.03587	-1.45293	RNA binding motif protein 11
TMEM35A	0.00532	0.000399	-4.20656	0.02674	-1.04675	transmembrane protein 35A
FGF14	0.00535	0.000402	-4.20318	0.019	-1.24154	fibroblast growth factor 14
OLFM3	0.00549	0.000422	-4.18326	-0.02658	-1.1602	olfactomedin 3
STMN1	0.00567	0.000442	-4.16372	-0.0713	-1.20622	stathmin 1
GAD1	0.00572	0.000448	-4.15745	-0.08564	-1.09029	glutamate decarboxylase 1
CCDC85A	0.00573	0.00045	-4.15642	-0.08798	-1.04081	coiled-coil domain containing 85A
RGS12	0.00573	0.00045	-4.1556	-0.08986	-1.0847	regulator of G-protein signaling 12
HSD11B1	0.00579	0.000459	-4.14767	-0.10801	-1.03906	hydroxysteroid 11-beta dehydrogenase 1
GABRA1	0.00597	0.00048	-4.12927	-0.15009	-1.41593	gamma-aminobutyric acid type A receptor alpha1 subunit
STAT4	0.006	0.000483	-4.12636	-0.15674	-1.21555	signal transducer and activator of transcription 4
TRIM37	0.00611	0.000496	-4.11511	-0.18246	-1.15186	tripartite motif containing 37
DOK5	0.00641	0.00053	-4.08744	-0.24569	-1.09804	docking protein 5
DBN1	0.00653	0.000548	-4.07343	-0.2777	-1.06796	drebrin 1
SGPP1	0.0066	0.000558	-4.06626	-0.29409	-1.13296	sphingosine-1-phosphate phosphatase 1
BCL11A	0.00661	0.00056	-4.06465	-0.29775	-1.05483	B-cell CLL/lymphoma 11A
RAB12	0.0067	0.000572	-4.05544	-0.31879	-1.61405	RAB12, member RAS oncogene family
WAC	0.00684	0.000589	-4.04324	-0.34664	-1.1024	WW domain containing adaptor with coiled-coil
DTD2	0.00732	0.000658	-3.99677	-0.45267	-1.11841	D-tyrosyl-tRNA deacylase 2 (putative)
SCN1B	0.0075	0.000683	-3.98127	-0.48801	-1.31291	sodium voltage-gated channel beta subunit 1
EFHB	0.00765	0.0007	-3.97065	-0.51222	-1.42429	EF-hand domain family member B
AP1S1	0.00773	0.000714	-3.96281	-0.53008	-1.25299	adaptor related protein complex 1 sigma 1 subunit
CCNH	0.00777	0.000718	-3.96001	-0.53645	-1.06035	cyclin H
SNCA	0.00799	0.000753	-3.94042	-0.58108	-1.12159	synuclein alpha
SLC25A3	0.00826	0.000791	-3.91954	-0.6286	-1.70987	solute carrier family 25 member 3
MAL2	0.0085	0.000827	-3.90072	-0.67142	-1.65038	mal, T-cell differentiation protein 2 (gene/pseudogene)
DUSP6	0.00851	0.000832	-3.89852	-0.67643	-1.07229	dual specificity phosphatase 6
GGH	0.00862	0.000849	-3.89019	-0.69535	-1.14989	gamma-glutamyl hydrolase
AK5	0.00877	0.000873	-3.87833	-0.72231	-1.5468	adenylate kinase 5
VPS16	0.00888	0.000887	-3.87133	-0.73821	-1.03399	VPS16, CORVET/HOPS core subunit
PVALB	0.00888	0.000888	-3.87116	-0.73861	-1.71481	parvalbumin
PPEF1	0.00929	0.000958	-3.83921	-0.81115	-1.00858	protein phosphatase with EF-hand domain 1
MED12L	0.01	0.00107	-3.79313	-0.91563	-1.08431	mediator complex subunit 12 like
PPP2R2B	0.0107	0.00118	-3.74991	-1.01345	-1.79003	protein phosphatase 2 regulatory subunit Bbeta
PPM1B	0.0111	0.00124	-3.72912	-1.06044	-1.17247	protein phosphatase, Mg2+/Mn2+ dependent 1B
TSPYL2	0.0111	0.00125	-3.72728	-1.0646	-1.00573	TSPY like 2
ZMYM3	0.0111	0.00126	-3.72488	-1.07001	-1.16911	zinc finger MYM-type containing 3
PPM1B	0.0112	0.00128	-3.71823	-1.08503	-1.0862	protein phosphatase, Mg2+/Mn2+ dependent 1B
VGF	0.0115	0.00131	-3.7067	-1.11105	-1.36557	VGF nerve growth factor inducible
CHGB	0.0118	0.00137	-3.68878	-1.15147	-1.40683	chromogranin B
KCNK1	0.0118	0.00137	-3.68815	-1.1529	-1.06107	potassium two pore domain channel subfamily K member 1
GRIA4	0.012	0.00142	-3.67455	-1.18354	-1.23503	glutamate ionotropic receptor AMPA type subunit 4
THYN1	0.0122	0.00145	-3.66564	-1.20361	-1.052	thymocyte nuclear protein 1
CRH	0.0124	0.00149	-3.65378	-1.23032	-1.34665	corticotropin releasing hormone
ELMOD1	0.013	0.00161	-3.62175	-1.30234	-1.07381	ELMO domain containing 1
VPS50	0.0139	0.00177	-3.58041	-1.39513	-1.10619	VPS50, EARP/GARPII complex subunit
DYNC1I1	0.0158	0.00211	-3.50628	-1.56089	-1.06547	dynein cytoplasmic 1 intermediate chain 1
ATP5G1	0.0159	0.00214	-3.49965	-1.57568	-1.38181	ATP synthase, H+ transporting, mitochondrial Fo complex subunit C1 (subunit 9)
VAMP1	0.0163	0.00222	-3.48415	-1.61023	-1.0817	vesicle associated membrane protein 1
PCSK1	0.0164	0.00223	-3.48241	-1.6141	-1.40203	proprotein convertase subtilisin/kexin type 1
PPP2R5D	0.0167	0.0023	-3.4703	-1.64108	-1.17531	protein phosphatase 2 regulatory subunit B'delta
ATP2B1	0.0176	0.00247	-3.43897	-1.71071	-1.24587	ATPase plasma membrane Ca2+ transporting 1
SPG21	0.0177	0.00249	-3.43606	-1.71719	-1.0656	spastic paraplegia 21 (autosomal recessive, Mast syndrome)
HSPB3	0.0182	0.00259	-3.4192	-1.75458	-1.12484	heat shock protein family B (small) member 3
DCAF6	0.0189	0.00274	-3.3942	-1.80996	-1.12161	DDB1 and CUL4 associated factor 6
GABRG2	0.0194	0.00286	-3.37624	-1.84968	-1.43455	gamma-aminobutyric acid type A receptor gamma2 subunit
SPAG8	0.0197	0.00292	-3.3675	-1.86899	-1.31854	sperm associated antigen 8
CDKN3	0.0198	0.00296	-3.36238	-1.8803	-1.10152	cyclin dependent kinase inhibitor 3
USMG5	0.0198	0.00296	-3.36183	-1.88151	-2.09999	up-regulated during skeletal muscle growth 5 homolog (mouse)
CORT	0.0205	0.00311	-3.3401	-1.92942	-1.38678	cortistatin
BNIP3L	0.0211	0.00325	-3.32248	-1.96821	-1.12892	BCL2 interacting protein 3 like
WASF1	0.0214	0.0033	-3.3147	-1.98532	-1.13964	WAS protein family member 1
SNX10	0.0216	0.00336	-3.30788	-2.00031	-1.2649	sorting nexin 10
ST6GALNAC5	0.0218	0.0034	-3.30247	-2.01221	-1.00229	ST6 N-acetylgalactosaminide alpha-2,6-sialyltransferase 5
BBOF1	0.0221	0.00348	-3.2926	-2.03387	-1.10624	basal body orientation factor 1
HLA-DQB1	0.0229	0.00367	-3.26976	-2.08394	-1.33002	major histocompatibility complex, class II, DQ beta 1
ANKHD1	0.0232	0.00375	-3.26092	-2.10327	-1.28138	ankyrin repeat and KH domain containing 1
XK	0.0244	0.00401	-3.232	-2.16648	-1.03748	X-linked Kx blood group
GABARAPL2	0.0261	0.00441	-3.19024	-2.2574	-1.04367	GABA type A receptor associated protein like 2
ZNF429	0.0264	0.00449	-3.18251	-2.27421	-1.18333	zinc finger protein 429
SUSD4	0.0269	0.00461	-3.17195	-2.29711	-1.06455	sushi domain containing 4
VAMP1	0.0275	0.00478	-3.15607	-2.33152	-1.03253	vesicle associated membrane protein 1
DCLK1	0.0277	0.00483	-3.15105	-2.34239	-1.02004	doublecortin like kinase 1
ZDHHC13	0.0289	0.00516	-3.12236	-2.40439	-1.76705	zinc finger DHHC-type containing 13
KCNC1	0.0294	0.00529	-3.11186	-2.42703	-1.12644	potassium voltage-gated channel subfamily C member 1
CSN1S1	0.0308	0.00564	-3.08412	-2.48671	-1.34796	casein alpha s1
HNRNPM	0.0321	0.00599	-3.05793	-2.5429	-1.13574	heterogeneous nuclear ribonucleoprotein M
RXFP1	0.0323	0.00606	-3.05273	-2.55403	-1.18584	relaxin/insulin like family peptide receptor 1
CEP170	0.0329	0.00623	-3.04069	-2.57977	-1.20075	centrosomal protein 170
CREG2	0.0338	0.0065	-3.02203	-2.61962	-1.0303	cellular repressor of E1A stimulated genes 2
OPN3	0.0339	0.00652	-3.02055	-2.62276	-1.00177	opsin 3
KCNJ12	0.0364	0.00722	-2.97597	-2.71754	-1.14568	potassium voltage-gated channel subfamily J member 12
DPYS	0.0365	0.00724	-2.97483	-2.71997	-1.00004	dihydropyrimidinase
SYT1	0.0365	0.00725	-2.97448	-2.72071	-1.31363	synaptotagmin 1
OPRL1	0.0391	0.00797	-2.9328	-2.8088	-2.29871	opioid related nociceptin receptor 1
KLK12	0.0402	0.00833	-2.91322	-2.85002	-1.11341	kallikrein related peptidase 12
SNCB	0.0412	0.0086	-2.8989	-2.88009	-1.03342	synuclein beta
USP9Y	0.0438	0.00933	-2.8629	-2.95542	-1.34085	ubiquitin specific peptidase 9, Y-linked
NEFM	0.0444	0.00952	-2.85396	-2.97408	-1.21992	neurofilament, medium polypeptide
CLEC4GP1	0.0444	0.00955	-2.8529	-2.97629	-1.09146	C-type lectin domain family 4 member G pseudogene 1
NEK2	0.0447	0.00961	-2.84994	-2.98246	-1.0906	NIMA related kinase 2

## Sheet: Table S1b
Table S1b: Up-regulated DEGs in GSE135511
Gene.symbol	adj.P.Val	P.Value	t	B	logFC	Gene.title
RN7SK	6.52e-07	3.47e-11	12.5192	15.2272	1.24876	RNA, 7SK small nuclear
NACC2	2.25e-05	2.39e-09	9.89858	11.4464	1.75639	NACC family member 2
CEL	3.83e-05	7.81e-09	9.23981	10.3555	1.63128	carboxyl ester lipase
SHC1	3.83e-05	1.32e-08	8.9578	9.86964	1.02366	SHC adaptor protein 1
FGF17	3.83e-05	1.42e-08	8.91734	9.79898	1.53327	fibroblast growth factor 17
RBMS2	5.02e-05	3.11e-08	8.50639	9.06777	1.49474	RNA binding motif single stranded interacting protein 2
PLOD3	5.02e-05	4.27e-08	8.34352	8.77105	1.00364	procollagen-lysine,2-oxoglutarate 5-dioxygenase 3
TEAD2	5.13e-05	4.91e-08	8.27259	8.64059	1.19128	TEA domain transcription factor 2
HEY2	5.13e-05	4.92e-08	8.27183	8.63917	1.30671	hes related family bHLH transcription factor with YRPW motif 2
HSPB1	5.39e-05	5.73e-08	8.19417	8.49547	1.31758	heat shock protein family B (small) member 1
COL18A1	7.12e-05	9.08e-08	7.96268	8.06172	1.19229	collagen type XVIII alpha 1 chain
ATXN2L	8.39e-05	1.12e-07	7.86039	7.86748	1.10304	ataxin 2 like
CCDC102A	0.000121	1.8e-07	7.62376	7.41212	1.1521	coiled-coil domain containing 102A
CHST6	0.000138	2.12e-07	7.54491	7.25851	1.5364	carbohydrate sulfotransferase 6
SLC5A3	0.000138	2.48e-07	7.46961	7.11093	1.8929	solute carrier family 5 member 3
SERPINH1	0.000138	2.5e-07	7.46547	7.10281	1.63354	serpin family H member 1
HGFAC	0.000142	2.72e-07	7.42483	7.02277	1.65484	HGF activator
BAIAP2L1	0.000148	3.39e-07	7.31919	6.81361	1.21858	BAI1 associated protein 2 like 1
GFAP	0.000156	4.16e-07	7.22207	6.61985	1.88345	glial fibrillary acidic protein
ZNF692	0.000157	4.72e-07	7.16163	6.49856	1.03084	zinc finger protein 692
CAPN15	0.000161	5.4e-07	7.09817	6.37063	1.14088	calpain 15
GJA4	0.000162	5.58e-07	7.08213	6.33819	1.46327	gap junction protein alpha 4
COL4A1	0.000167	5.93e-07	7.05354	6.28029	1.60796	collagen type IV alpha 1 chain
C7orf61	0.00018	7.39e-07	6.95072	6.07108	1.88769	chromosome 7 open reading frame 61
BGN	0.00018	7.46e-07	6.94624	6.06194	1.0979	biglycan
DNASE1L2	0.000189	8.12e-07	6.90662	5.98087	1.11223	deoxyribonuclease 1 like 2
NPC1L1	0.000259	1.24e-06	6.71162	5.57863	2.25157	NPC1 like intracellular cholesterol transporter 1
ABCA7	0.00029	1.53e-06	6.61324	5.37362	1.32691	ATP binding cassette subfamily A member 7
AKAP8L	0.000319	1.9e-06	6.51508	5.16772	1.03441	A-kinase anchoring protein 8 like
STEAP3	0.000349	2.19e-06	6.45085	5.03228	1.22493	STEAP3 metalloreductase
PLEKHA4	0.000355	2.3e-06	6.42863	4.9853	1.10509	pleckstrin homology domain containing A4
FAM124A	0.000355	2.3e-06	6.42777	4.98347	1.00454	family with sequence similarity 124 member A
ZMIZ2	0.000391	2.91e-06	6.32145	4.7577	1.13875	zinc finger MIZ-type containing 2
TFPI	0.000391	2.94e-06	6.31786	4.75005	1.39358	tissue factor pathway inhibitor
STH	0.000393	2.99e-06	6.31004	4.73337	1.20975	saitohin
QRICH2	0.000474	4e-06	6.17918	4.45321	1.21214	glutamine rich 2
MECOM	0.000495	4.3e-06	6.14707	4.38413	1.35085	MDS1 and EVI1 complex locus
PYGO2	0.000543	5.15e-06	6.06676	4.21076	1.00716	pygopus family PHD finger 2
DPP9	0.000543	5.16e-06	6.06629	4.20974	1.06144	dipeptidyl peptidase 9
ZBTB40	0.000543	5.17e-06	6.06483	4.20659	1.05777	zinc finger and BTB domain containing 40
ELK1	0.000543	5.18e-06	6.06446	4.20577	1.0545	ELK1, ETS transcription factor
SBNO2	0.000564	5.46e-06	6.04121	4.15543	1.11466	strawberry notch homolog 2
TNFRSF1A	0.000601	6.13e-06	5.98956	4.04334	1.05781	TNF receptor superfamily member 1A
LILRA3	0.000602	6.24e-06	5.9822	4.02734	1.33424	leukocyte immunoglobulin like receptor A3
WFIKKN1	0.000625	6.95e-06	5.93436	3.92317	1.20978	WAP, follistatin/kazal, immunoglobulin, kunitz and netrin domain containing 1
COL4A2	0.000638	7.2e-06	5.91884	3.88933	1.00681	collagen type IV alpha 2 chain
KIF7	0.000642	7.31e-06	5.91219	3.8748	1.02816	kinesin family member 7
A4GALT	0.00072	9e-06	5.82062	3.67442	1.37226	alpha 1,4-galactosyltransferase
TFPI	0.000725	9.26e-06	5.80832	3.64744	1.09961	tissue factor pathway inhibitor
TCIRG1	0.000729	9.84e-06	5.78139	3.58828	1.15491	T-cell immune regulator 1, ATPase H+ transporting V0 subunit a3
MLKL	0.000858	1.34e-05	5.64551	3.28857	1.19923	mixed lineage kinase domain like
AGBL5	0.000858	1.37e-05	5.63818	3.27234	1.04105	ATP/GTP binding protein like 5
POLE	0.000898	1.52e-05	5.59215	3.17031	1.1996	DNA polymerase epsilon, catalytic subunit
SRGAP1	0.000923	1.59e-05	5.57257	3.12683	1.09857	SLIT-ROBO Rho GTPase activating protein 1
MOV10	0.000927	1.61e-05	5.56613	3.11253	1.05821	Mov10 RISC complex RNA helicase
GBP2	0.00096	1.73e-05	5.53486	3.04302	1.6751	guanylate binding protein 2
IKBKE	0.000964	1.77e-05	5.52569	3.0226	1.02944	inhibitor of kappa light polypeptide gene enhancer in B-cells, kinase epsilon
ANKHD1-EIF4EBP3	0.000964	1.77e-05	5.52554	3.02228	1.0964	ANKHD1-EIF4EBP3 readthrough
WHRN	0.000975	1.83e-05	5.51052	2.98883	1.01802	whirlin
HSD3B7	0.00103	2.08e-05	5.45714	2.86979	1.13819	hydroxy-delta-5-steroid dehydrogenase, 3 beta- and steroid delta-isomerase 7
HLA-DRB1	0.00106	2.25e-05	5.42283	2.79313	4.25335	major histocompatibility complex, class II, DR beta 1
POLN	0.0011	2.4e-05	5.39521	2.73133	1.01912	DNA polymerase nu
LGI4	0.00111	2.46e-05	5.38417	2.70662	1.08286	leucine rich repeat LGI family member 4
ATPAF2	0.00117	2.71e-05	5.34222	2.61258	1.03378	ATP synthase mitochondrial F1 complex assembly factor 2
TRIM47	0.00124	3.01e-05	5.29786	2.51299	1.21937	tripartite motif containing 47
MKNK2	0.00125	3.07e-05	5.28845	2.49183	1.01635	MAP kinase interacting serine/threonine kinase 2
FAM46C	0.00126	3.13e-05	5.28032	2.47356	1.24395	family with sequence similarity 46 member C
TIMP1	0.00135	3.51e-05	5.23211	2.36504	1.65518	TIMP metallopeptidase inhibitor 1
SLIT3	0.00137	3.61e-05	5.21989	2.3375	1.09802	slit guidance ligand 3
FGF11	0.0014	3.75e-05	5.20371	2.30103	1.13395	fibroblast growth factor 11
MIER2	0.0014	3.79e-05	5.19939	2.29127	1.01848	MIER family member 2
LMOD1	0.00144	3.92e-05	5.18443	2.25752	1.56602	leiomodin 1
ITPKB	0.00144	3.96e-05	5.17996	2.24743	1.19146	inositol-trisphosphate 3-kinase B
C10orf54	0.00144	4.05e-05	5.17055	2.22619	1.24773	chromosome 10 open reading frame 54
PLXDC2	0.00147	4.16e-05	5.15891	2.19991	1.16792	plexin domain containing 2
REP15	0.00148	4.29e-05	5.14624	2.17127	1.0392	RAB15 effector protein
AEBP1	0.00152	4.54e-05	5.12205	2.11659	1.14089	AE binding protein 1
PGGHG	0.00153	4.63e-05	5.11356	2.0974	1.24303	protein-glucosylgalactosylhydroxylysine glucosidase
DUSP8	0.00155	4.74e-05	5.10389	2.0755	1.32152	dual specificity phosphatase 8
ATOH8	0.00155	4.74e-05	5.10363	2.07491	1.29678	atonal bHLH transcription factor 8
PARVG	0.00158	4.99e-05	5.08201	2.02599	1.3106	parvin gamma
ADORA2A	0.00161	5.15e-05	5.0678	1.99379	1.23219	adenosine A2a receptor
C1orf64	0.00162	5.23e-05	5.06177	1.98013	1.12874	chromosome 1 open reading frame 64
GDPD3	0.00166	5.46e-05	5.04308	1.93777	1.3901	glycerophosphodiester phosphodiesterase domain containing 3
EFNA1	0.0017	5.66e-05	5.02773	1.90297	1.0575	ephrin A1
RHOD	0.00182	6.44e-05	4.97361	1.78011	1.21589	ras homolog family member D
PLA1A	0.00185	6.72e-05	4.95528	1.73846	1.29171	phospholipase A1 member A
HYAL1	0.0019	7.05e-05	4.93489	1.6921	1.02582	hyaluronoglucosaminidase 1
TLR5	0.0019	7.09e-05	4.93237	1.68636	1.23895	toll like receptor 5
BST2	0.0019	7.11e-05	4.93117	1.68363	1.0677	bone marrow stromal cell antigen 2
IGLL1	0.00191	7.18e-05	4.92697	1.67408	2.2625	immunoglobulin lambda like polypeptide 1
ADAMTS9	0.00204	8.02e-05	4.88018	1.56761	1.78977	ADAM metallopeptidase with thrombospondin type 1 motif 9
TAOK2	0.00206	8.16e-05	4.87321	1.55173	1.03295	TAO kinase 2
ANGPT2	0.00222	9.32e-05	4.81711	1.42389	2.10108	angiopoietin 2
FGFRL1	0.00222	9.37e-05	4.81474	1.41847	1.1813	fibroblast growth factor receptor-like 1
WASH1	0.00223	9.44e-05	4.8116	1.41131	1.00038	WAS protein family homolog 1
AQP1	0.00227	9.82e-05	4.79495	1.37333	1.65126	aquaporin 1 (Colton blood group)
TAGLN2	0.00256	0.000119	4.71437	1.18935	1.07881	transgelin 2
AKR1C3	0.00264	0.000124	4.69586	1.14706	1.23469	aldo-keto reductase family 1, member C3
CRYAB	0.00277	0.000137	4.65425	1.05193	1.02719	crystallin alpha B
MYRFL	0.00282	0.00014	4.64456	1.02978	1.24664	myelin regulatory factor-like
POU2F2	0.0029	0.000147	4.62645	0.98834	1.4993	POU class 2 homeobox 2
SFMBT2	0.00296	0.000153	4.60802	0.94619	1.18589	Scm-like with four mbt domains 2
ENG	0.00302	0.000158	4.59407	0.91426	1.10834	endoglin
SLC25A41	0.00317	0.00017	4.56416	0.84581	1.06254	solute carrier family 25 member 41
STAB1	0.00332	0.000182	4.53571	0.78065	1.30258	stabilin 1
WDR47	0.00336	0.000186	4.52535	0.75694	2.8053	WD repeat domain 47
CCL19	0.00362	0.00021	4.4752	0.64209	1.22388	C-C motif chemokine ligand 19
YBX3	0.00371	0.000219	4.45806	0.60281	1.33378	Y-box binding protein 3
TCAP	0.00371	0.000219	4.45724	0.60094	1.38016	titin-cap
BAG3	0.00378	0.000225	4.44638	0.57607	1.36903	BCL2 associated athanogene 3
C10orf10	0.00384	0.000232	4.43358	0.54672	1.81752	chromosome 10 open reading frame 10
CARD14	0.00386	0.000234	4.43004	0.53863	1.43388	caspase recruitment domain family member 14
SERINC5	0.004	0.00025	4.40259	0.47575	1.12977	serine incorporator 5
IGFLR1	0.00402	0.000252	4.39861	0.46662	1.28583	IGF like family receptor 1
DMWD	0.00402	0.000253	4.39794	0.46509	1.05316	dystrophia myotonica, WD repeat containing
ID3	0.00412	0.000264	4.37998	0.42394	1.00421	inhibitor of DNA binding 3, HLH protein
RAPGEF3	0.00412	0.000264	4.37888	0.42141	1.04562	Rap guanine nucleotide exchange factor 3
FGFR4	0.00425	0.000279	4.35666	0.3705	1.05368	fibroblast growth factor receptor 4
SYTL4	0.00437	0.000291	4.33854	0.329	1.36004	synaptotagmin like 4
NUPR1	0.00438	0.000293	4.33595	0.32305	1.36449	nuclear protein 1, transcriptional regulator
TM4SF18	0.00451	0.000306	4.3172	0.2801	1.01849	transmembrane 4 L six family member 18
BCO1	0.00454	0.000309	4.3134	0.27141	2.05537	beta-carotene oxygenase 1
PTGER1	0.00465	0.000322	4.29619	0.23198	1.21601	prostaglandin E receptor 1
POU4F1	0.0047	0.000327	4.29033	0.21855	1.1235	POU class 4 homeobox 1
CFB	0.00495	0.000356	4.2543	0.13604	1.05978	complement factor B
CT45A3	0.00502	0.000366	4.24249	0.10899	1.69319	cancer/testis antigen family 45, member A3
FAM129A	0.00511	0.000374	4.23337	0.0881	1.26998	family with sequence similarity 129 member A
DLEC1	0.00521	0.000386	4.22015	0.05786	1.06009	deleted in lung and esophageal cancer 1
GALNT15	0.0053	0.000396	4.20988	0.03435	1.02619	polypeptide N-acetylgalactosaminyltransferase 15
MS4A14	0.00536	0.000404	4.20127	0.01464	1.3039	membrane spanning 4-domains A14
CCDC180	0.00539	0.000407	4.19765	0.00635	1.22317	coiled-coil domain containing 180
TDRD10	0.00541	0.000409	4.19597	0.00251	1.04343	tudor domain containing 10
SLCO4A1	0.00547	0.000419	4.18589	-0.02056	1.04714	solute carrier organic anion transporter family member 4A1
GNG8	0.00548	0.000421	4.18421	-0.02442	1.02065	G protein subunit gamma 8
HLA-DRB5	0.00567	0.000443	4.1623	-0.07453	4.11788	major histocompatibility complex, class II, DR beta 5
GPR4	0.0057	0.000446	4.16009	-0.07959	1.32798	G protein-coupled receptor 4
MPZL1	0.00605	0.000488	4.1224	-0.1658	1.26829	myelin protein zero like 1
LAT2	0.00641	0.00053	4.08785	-0.24476	1.022	linker for activation of T-cells family member 2
SUSD2	0.00647	0.000537	4.082	-0.25813	1.27527	sushi domain containing 2
FCGBP	0.0065	0.000542	4.07778	-0.26776	2.73483	Fc fragment of IgG binding protein
TNS1	0.00681	0.000584	4.04692	-0.33823	1.08251	tensin 1
SMAD6	0.00685	0.000595	4.03936	-0.3555	1.06641	SMAD family member 6
SERPINA5	0.00694	0.000607	4.03079	-0.37507	2.01176	serpin family A member 5
HMOX1	0.00701	0.000616	4.02425	-0.38998	1.46498	heme oxygenase 1
SPATA6L	0.0071	0.00063	4.0149	-0.41131	1.10524	spermatogenesis associated 6 like
MYO1F	0.00769	0.000707	3.96655	-0.52156	1.09588	myosin IF
SCIN	0.00771	0.000711	3.96466	-0.52586	1.98554	scinderin
SLC19A3	0.00799	0.000753	3.94032	-0.58131	1.03946	solute carrier family 19 member 3
GBGT1	0.00805	0.00076	3.93625	-0.59058	1.04626	globoside alpha-1,3-N-acetylgalactosaminyltransferase 1
FCGBP	0.0085	0.000828	3.90026	-0.67245	1.93636	Fc fragment of IgG binding protein
FAM124B	0.00857	0.000839	3.89473	-0.68504	1.01039	family with sequence similarity 124 member B
MYBPH	0.00867	0.000855	3.88714	-0.7023	1.47163	myosin binding protein H
HSPA1A	0.00867	0.000857	3.88604	-0.70478	1.3619	heat shock protein family A (Hsp70) member 1A
RHBDF2	0.00908	0.000924	3.85446	-0.77654	1.03744	rhomboid 5 homolog 2
KIR2DS5	0.00908	0.000926	3.85369	-0.77829	1.14536	killer cell immunoglobulin like receptor, two Ig domains and short cytoplasmic tail 5
UCP2	0.00933	0.000963	3.83697	-0.81623	1.25485	uncoupling protein 2
2022-03-08	0.00936	0.00097	3.83418	-0.82257	1.8443	membrane associated ring-CH-type finger 8
CD44	0.01	0.00107	3.79214	-0.91788	1.74028	CD44 molecule (Indian blood group)
RARRES3	0.0102	0.00109	3.78334	-0.93782	1.4147	retinoic acid receptor responder 3
STON1	0.0102	0.0011	3.7814	-0.94221	1.42879	stonin 1
C1orf106	0.0102	0.0011	3.78084	-0.94347	1.09612	chromosome 1 open reading frame 106
IL18BP	0.0103	0.00112	3.77355	-0.95996	1.14961	interleukin 18 binding protein
UNC13D	0.0105	0.00114	3.76695	-0.97491	1.23767	unc-13 homolog D
HABP2	0.0109	0.00121	3.74069	-1.0343	1.08265	hyaluronan binding protein 2
IFITM2	0.0113	0.00129	3.71461	-1.09319	1.20684	interferon induced transmembrane protein 2
CTAGE5	0.0118	0.00137	3.68813	-1.15293	1.4261	CTAGE family member 5, ER export factor
NRM	0.0119	0.00139	3.68197	-1.16684	1.07426	nurim (nuclear envelope membrane protein)
TMBIM1	0.0121	0.00143	3.67089	-1.1918	1.21808	transmembrane BAX inhibitor motif containing 1
BACE2	0.0121	0.00143	3.67038	-1.19294	1.15268	beta-site APP-cleaving enzyme 2
ANG	0.0124	0.00149	3.65395	-1.22994	1.04838	angiogenin
TGM2	0.0125	0.0015	3.65099	-1.23661	1.13228	transglutaminase 2
LY96	0.0126	0.00152	3.64557	-1.2488	1.10186	lymphocyte antigen 96
SPP1	0.0146	0.00189	3.5518	-1.45919	1.22718	secreted phosphoprotein 1
IFITM3	0.0148	0.00193	3.54402	-1.4766	1.12633	interferon induced transmembrane protein 3
NAPSA	0.0149	0.00194	3.54223	-1.48059	1.46751	napsin A aspartic peptidase
ITGA1	0.0163	0.00221	3.48563	-1.60694	1.10951	integrin subunit alpha 1
STC1	0.0164	0.00225	3.47934	-1.62095	1.70436	stanniocalcin 1
E2F2	0.0165	0.00225	3.4778	-1.62437	1.4901	E2F transcription factor 2
OXTR	0.0166	0.00228	3.47385	-1.63316	1.28933	oxytocin receptor
CHI3L2	0.0166	0.00229	3.47156	-1.63827	1.79878	chitinase 3 like 2
NRTN	0.0169	0.00234	3.46185	-1.65987	1.33825	neurturin
CXCL10	0.017	0.00237	3.45728	-1.67003	1.07382	C-X-C motif chemokine ligand 10
RASEF	0.0172	0.00239	3.45269	-1.68023	1.21253	RAS and EF-hand domain containing
WWTR1	0.018	0.00254	3.42706	-1.73715	1.39198	WW domain containing transcription regulator 1
FCN3	0.0185	0.00266	3.40826	-1.77883	1.18323	ficolin 3
SCN10A	0.0186	0.00268	3.40398	-1.78832	1.13301	sodium voltage-gated channel alpha subunit 10
C1R	0.0194	0.00287	3.37456	-1.85339	1.15603	complement C1r subcomponent
TSKS	0.0198	0.00296	3.36199	-1.88115	1.50712	testis specific serine kinase substrate
NQO1	0.0201	0.00302	3.3537	-1.89945	1.12573	NAD(P)H quinone dehydrogenase 1
ANGPTL4	0.0205	0.00311	3.34098	-1.92749	1.08856	angiopoietin like 4
TNFRSF1B	0.0206	0.00313	3.33808	-1.93387	1.00371	TNF receptor superfamily member 1B
TRIM5	0.022	0.00346	3.29539	-2.02776	1.2389	tripartite motif containing 5
S100A3	0.023	0.00369	3.26753	-2.08882	1.87652	S100 calcium binding protein A3
UBQLNL	0.023	0.0037	3.26641	-2.09127	1.18339	ubiquilin-like
MBD2	0.0234	0.00379	3.2564	-2.11317	1.14271	methyl-CpG binding domain protein 2
CDKN1A	0.0235	0.00381	3.25318	-2.12021	1.10574	cyclin dependent kinase inhibitor 1A
DTNA	0.0237	0.00386	3.24767	-2.13226	1.22151	dystrobrevin alpha
IGSF22	0.0238	0.00387	3.24671	-2.13435	1.19088	immunoglobulin superfamily member 22
S100A4	0.0238	0.00389	3.24504	-2.13801	1.26463	S100 calcium binding protein A4
C1orf87	0.0247	0.00407	3.22481	-2.18215	1.16133	chromosome 1 open reading frame 87
TGM1	0.025	0.00414	3.21799	-2.19703	1.13253	transglutaminase 1
RALGPS2	0.0253	0.0042	3.21209	-2.20988	1.68774	Ral GEF with PH domain and SH3 binding motif 2
SRPX2	0.0253	0.00421	3.21024	-2.2139	1.34822	sushi repeat containing protein, X-linked 2
SYT8	0.0262	0.00446	3.18606	-2.26648	1.15047	synaptotagmin 8
MMP25	0.0265	0.00453	3.17926	-2.28126	1.06636	matrix metallopeptidase 25
ZYG11A	0.0267	0.00456	3.17587	-2.28861	1.40663	zyg-11 family member A, cell cycle regulator
TPRG1	0.027	0.00463	3.16921	-2.30305	1.29381	tumor protein p63 regulated 1
SERPINA3	0.0289	0.00516	3.12284	-2.40335	2.96037	serpin family A member 3
MSLN	0.0289	0.00516	3.12279	-2.40347	1.35781	mesothelin
CD44	0.0289	0.00516	3.12239	-2.40432	1.24343	CD44 molecule (Indian blood group)
PGAM2	0.0296	0.00534	3.10752	-2.43637	1.00661	phosphoglycerate mutase 2
TEX14	0.0296	0.00535	3.10703	-2.43745	1.41742	testis expressed 14, intercellular bridge forming factor
TLR9	0.0302	0.00549	3.0956	-2.46203	1.16908	toll like receptor 9
CCNB2	0.0304	0.00555	3.09084	-2.47228	1.35973	cyclin B2
ESRP2	0.0312	0.00576	3.07493	-2.50646	1.2572	epithelial splicing regulatory protein 2
DEPDC1B	0.0316	0.00586	3.06751	-2.52236	1.13118	DEP domain containing 1B
TCL1A	0.0318	0.00593	3.0624	-2.53331	1.18275	T-cell leukemia/lymphoma 1A
IRF7	0.0353	0.00694	2.99357	-2.68018	1.21873	interferon regulatory factor 7
CD300A	0.0354	0.00697	2.99181	-2.68393	1.0011	CD300a molecule
ZNF345	0.0366	0.00727	2.97306	-2.72371	1.31465	zinc finger protein 345
VRK2	0.0376	0.00753	2.95791	-2.75578	1.31665	vaccinia related kinase 2
DAZ1	0.038	0.00764	2.95107	-2.77025	1.1758	deleted in azoospermia 1
MUC1	0.0385	0.0078	2.94202	-2.78936	1.00387	mucin 1, cell surface associated
HCAR3	0.0402	0.00833	2.91319	-2.85008	1.21032	hydroxycarboxylic acid receptor 3
ATP6V0A4	0.0406	0.00842	2.90829	-2.86039	1.02288	ATPase H+ transporting V0 subunit a4
STXBP2	0.0411	0.00857	2.90046	-2.87682	1.01078	syntaxin binding protein 2
TNFSF10	0.0417	0.00876	2.8912	-2.89624	1.14914	tumor necrosis factor superfamily member 10
MTFR2	0.0423	0.0089	2.88374	-2.91186	1.06373	mitochondrial fission regulator 2
LCP1	0.0424	0.00896	2.88089	-2.91782	1.00897	lymphocyte cytosolic protein 1
SEPP1	0.0433	0.0092	2.86916	-2.94235	1.13327	selenoprotein P, plasma, 1
H2AFB1	0.0433	0.00922	2.86829	-2.94418	1.55443	H2A histone family member B1
TNFRSF10D	0.0438	0.00933	2.86286	-2.95552	1.80299	TNF receptor superfamily member 10d
COL8A1	0.0457	0.00991	2.83616	-3.01113	1.23952	collagen type VIII alpha 1 chain
PTGER3	0.0458	0.00994	2.83479	-3.01399	1.06093	prostaglandin E receptor 3
TMPRSS3	0.0458	0.00994	2.8347	-3.01416	1.09032	transmembrane protease, serine 3
OR2M1P	0.0463	0.0101	2.82911	-3.02577	1.00238	olfactory receptor family 2 subfamily M member 1 pseudogene
