# Supplementary material for: Discovery of grey matter lesion-related immune genes for diagnostic prediction in multiple sclerosis
Source: PeerJ. 2023 Apr 26;11:e15299. doi: 10.7717/peerj.15299 (PMC10148642; doi:10.7717/peerj.15299)
Supplement: Supplemental Information 3 [file peerj-11-15299-s003.xls]

## Sheet: Table S2a
Supplementary table S2: Immune-related genes obtained from InnateDB and ImmPort
Table S2a: Immune genes obtained from InnateDB
InnateDB Gene ID	Gene Symbol	Species	PubMED ID	Annotation
131550	Id2	10090	25902484	Group 3 innate lymphoid cells (ILC3s) can mediate immune surveillance, which constantly maintains a proper microbiota, to facilitate early colonization resistance through an Id2-dependent regulation of Il22.
192083	Iltifb	10090	21469124	Iltifb (Il22b) increases the TNF-alpha-dependent induction and secretion of several immune-modulatory molecules such as initial complement factors, antimicrobial peptides and chemokines in primary keratinocytes. Iltifb-mediated induction of innate immunity is crucial for the maintenance of epidermal integrity during infection with Candida albicans. (Demonstrated in human)
192083	Iltifb	10090	21874025	Iltifb (Il22) is produced by lymphoid tissue-inducer cells where it regulates the maintenance of colonic lymphoid structures during Citrobacter rodentium infection, a mechanism that bridges the lymphotoxin pathway to mucosal epithelial defense mechanisms.
192083	Iltifb	10090	22921121	ILTIFB (IL22) protects intestinal stem cells from inflammatory tissue damage and regulates sensitivity to graft versus host disease. (Demonstrated in human)
192083	Iltifb	10090	25395539	Flagellin induces Tlr5-dependent Il22 production and Nlrc4-dependent Il18 production to promote a protective gene expression program in intestinal epithelial cells and elimination of rotavirus-infected cells.
192083	Iltifb	10090	25456160	Cxcl16-Cxcr6 crosstalk coordinates the intestinal topography of Il22 secretion required for mucosal defence against Citrobacter rodentium infection.
192083	Iltifb	10090	25680273	Il22 augments the expression of Il18 mRNA and inactive precursor protein (proIL-18) in intestinal epithelial cells after Toxoplasma gondii or Citrobacter rodentium infection and maintains the homeostatic amount of proIL-18 in the ileum.
192083	Iltifb	10090	26649819	Innate lymphoid cells, potent producers of Il22 after intestinal injury, increase the growth of mouse small intestine organoids in an Il22-dependent fashion.
192083	Iltifb	10090	25902484	Group 3 innate lymphoid cells (ILC3s) can mediate immune surveillance, which constantly maintains a proper microbiota, to facilitate early colonization resistance through an Id2-dependent regulation of Il22.
76030	PRKRA	9606	25784705	The G3BP1-CAPRIN1-PRKRA complex represents a new mode of PRKRA activation and links stress responses with innate immune activation through PRKRA without a requirement for foreign double-stranded RNA pattern recognition.
76030	PRKRA	9606	26608320	A defective interfering RNA isolated from the Hu-191 vaccine strain of measles virus is sensed by PRKRA and DDX58 to initiate an innate antiviral response.
76030	PRKRA	9606	26454002	DDX3X participates in antiviral innate immunity by controlling translation of PRKRA.
229341	DDX3X	9606	18583960	DDX3X is a critical component of the TANK-binding kinase 1 (TBK1)-dependent innate immune response.
229341	DDX3X	9606	20127681	DDX3X is an antiviral MAVS (IPS-1) enhancer, where it can bind viral RNA to join it in the MAVS complex and this augments virus-mediated IFN-beta induction and host cell protection against virus infection.
229341	DDX3X	9606	20657822	DDX3X RNA helicase can augment TBK1/IKKepsilon activity and hepatitis B virus (HBV) polymerase (HBV Pol) inhibits this TBK1/IKBKE activity by disrupting the interaction between IKBKE and DDX3X, providing an explanation for how HBV evades innate immune response in the early phase of the infection.
229341	DDX3X	9606	25740981	DDX3X initiates a multifaceted cellular program involving dynamic associations with hepatitis C virus (HCV) RNA and proteins, CHUK, stress granules, and lipid droplet surfaces for its crucial role in the HCV life cycle.
229341	DDX3X	9606	26454002	DDX3X participates in antiviral innate immunity by controlling translation of PRKRA.
55854	DDX58	9606	15208624	DDX58 (RIG-I) is a cytoplasmic RNA helicase that functions as an intracellular sensor of dsRNA leading to the induction of Interferon (IFN) production independently of TLR signalling.
55854	DDX58	9606	18948594	DDX58 (RIG-I) first and second caspase recruitment domains (CARDs) have distinct roles in TRIM25-mediated RIG-I ubiquitination, which leads to initiation of an antiviral signalling cascade.
55854	DDX58	9606	19074283	DDX58 serves as a critical link between TLR3 and type-II-IFN signalling pathways in innate antiviral immune responses.
55854	DDX58	9606	19683681	DDX58 plays an essential role in Toll-like receptor (TLR)-stimulated phagocytosis, demonstrating that DDX58 plays a role not only in antiviral responses but in antibacterial responses as well.
55854	DDX58	9606	18523264	DDX58 plays a key role in the expression of TNF-alpha in macrophages in response to LPS stimulation, mainly for the late phase LPS-induced expression of TNF-alpha.
55854	DDX58	9606	19915568	DDX58 is a sensor able to activate the inflammasome in response to certain RNA viruses by binding to the adaptor PYCARD to trigger the caspase-1 (CASP1)-dependent inflammasome activation and IL-1-beta production.
55854	DDX58	9606	20403326	DDX58 binds specifically to K63-polyubiquitin chains through its tandem caspase recruitment domains (CARDs) that act as a ubiquitin sensor in a manner that depends on RNA and ATP, demonstrate that un-anchored K63-polyubiquitin chains are signalling molecules in antiviral innate immunity.
55854	DDX58	9606	20406818	DDX58 (RIG-I) phosphorylation on serine 8 operates as a negative switch of RIG-I activation by suppressing TRIM25 interaction.
55854	DDX58	9606	20511549	DDX58 innate immune response to viral infection of human cells is modified by a functional polymorphism in the RIG-I caspase recruitment domain (CARD).
55854	DDX58	9606	19936053	DDX58 (RIG-I) is responsible for the cytosolic recognition of Legionella pneumophila RNA and the subsequent induction of type I IFN response. (Demonstrated in murine model)
55854	DDX58	9606	21690088	DDX58 and NOD2 colocalize to cellular ruffles and cell-cell junctions to form a protein complex via the CARD domains. DDX58 negatively regulates ligand-induced NFkB signalling mediated by NOD2, and conversely, NOD2 negatively regulates type I interferon induction by DDX58.
55854	DDX58	9606	21695051	DDX58, through the TRAIL pathway, initiates apoptosis in hepatocytes infected with hepatitis C Virus to suppress viral replication. HCV envelope proteins counteract the antiviral host defence by inhibiting the expression of DDX58.
55854	DDX58	9606	22072774	DDX58 (RIG-I) ubiquitination is inhibited by arterivirus and nairovirus deubiquitinating enzymes (DUBs), resulting in the inhibition of RIG-I-like receptor (RLR)-mediated innate immune signalling. (Demonstrated in mice)
55854	DDX58	9606	22912779	Antiviral stress granules containing DDX58 (RIG-I) and EIF2AK2 (PKR) have a critical role in viral detection and innate immunity. (Demonstrated in mouse)
55854	DDX58	9606	23744645	DDX58 (RIG-I) stimulation with a synthetic ligand inhibits HIV replication in macrophages.
55854	DDX58	9606	23950712	RNF135 is essential for the association of DDX58 (RIG-I) and TRIM25, resulting in the activation of RIG-I signalling.
55854	DDX58	9606	24448099	ISG15 does not directly alter human rhinovirus replication but modulates immune signalling via the viral sensor protein DDX58 to impact production of CXCL10, which has been linked to innate immunity to viruses.
55854	DDX58	9606	24448099	Human rhinovirus infection of epithelial cells induces the expression and secretion of ISG15, which modulates immune responses via effects on DDX58, and by regulating CXCL10 production.
55854	DDX58	9606	24550253	The antisense L region of encephalomyocarditis virus associates with DDX58 and is a key determinant of IFIH1 stimulation of infected cells.
55854	DDX58	9606	25002588	IFI16 transcriptionally regulates type I interferons and DDX58 (RIG-I) and controls the interferon response to both DNA and RNA viruses.
55854	DDX58	9606	25520509	Paramyxoviruses trigger the DNA-damage response, a pathway required for RPS6KA5 activation of phospho Ser 276 RELA formation to trigger the IRF7-DDX58 amplification loop necessary for mucosal interferon production.
55854	DDX58	9606	25557055	DDX58 dually functions as an hepatitis B virus sensor activating innate signalling and as a direct antiviral factor by counteracting the viral polymerase in hepatocytes.
55854	DDX58	9606	26074083	DDX58 is the primary pattern recognition receptor (PRR) for influenza A virus (IAV), but IFIH1 is a significant contributor to the cellular defense against IAV.
55854	DDX58	9606	25880109	Signalling through both DDX58 and TLR3 is important for interferon induction by influenza A virus in alveolar epithelial cells.
55854	DDX58	9606	27210312	Hepatitis B virus-induced MIR146A attenuates cell-intrinsic anti-viral innate immunity through targeting DDX58 and IFIT3.
55854	DDX58	9606	26645583	MIR485 exhibits bispecificity, targeting DDX58 in cells with a low abundance of H5N1 virus and viral PB1 in cells with increased amounts of the H5N1 virus.
55854	DDX58	9606	26608320	A defective interfering RNA isolated from the Hu-191 vaccine strain of measles virus is sensed by PRKRA and DDX58 to initiate an innate antiviral response.
55854	DDX58	9606	26371557	ATP binding is required for DDX58 signalling on viral RNA. ATP hydrolysis provides an important function by recycling DDX58 and promoting its dissociation from non-pathogenic RNA.
55854	DDX58	9606	26378160	Influenza B virus induces IRF3 activation and IL29 (IFNL1) gene expression without a requirement for viral protein synthesis or replication and DDX58 is the critical pattern recognition receptor needed for IRF3 activation.
55854	DDX58	9606	25878102	EFTUD2 is a novel innate immune antiviral regulator that restricts hepatitis C virus infection through a DDX58/IFIH1-mediated, JAK-STAT-independent pathway.
55854	DDX58	9606	26450567	MIR136 exhibits potent antiviral activity against H5N1 influenza A virus and acts as an immune agonist of DDX58.
126353	MIR136	9606	26450567	MIR136 exhibits potent antiviral activity against H5N1 influenza A virus and acts as an immune agonist of DDX58.
223927	Mir146	10090	22545247	Mir146 directly targets Relb to modulate the amplitude of monocyte responses to inflammatory challenges.
223927	Mir146	10090	22593544	Mir146 is a mechanosensitive miRNA that modulates mechanotransduction and pressure-induced inflammation in small airway epithelium. (Demonstrated in human)
223927	Mir146	10090	24092752	Nod2 driven inflammation is regulated by nitric oxide responsive Mir146 that facilitates activation of sonic hedgehog (SHH) signalling by targeting Numb expression.
223927	Mir146	10090	25024218	T-cell-intrinsic Mir155 is required for type-2 immunity, in part through regulation of S1pr1, whereas T-cell-intrinsic Mir146 is required to prevent overt Th1/Th17 skewing.
223927	Mir146	10090	26048146	Mir146 attenuates sepsis-induced cardiac dysfunction by preventing NFÎºB activation, inflammatory cell infiltration, and inflammatory cytokine production via targeting of Irak1 and Traf6 in both cardiomyocytes and inflammatory monocytic cells.
223927	Mir146	10090	26456940	Mir146 has a role in constraining intestinal barrier function, a process that alters gut homeostasis and increases susceptibility to dextran sodium sulphate-induced colitis.
179050	Nod2	10090	18981137	Nod2-deficient mice have impaired resistance to Mycobacterium tuberculosis infection through defective innate and adaptive immunity.
179050	Nod2	10090	20679225	Nod2 functions in non-hematopoietic cells of the small intestinal crypts and this is critical for protecting mice from a Th1-driven granulomatous inflammation in the ilum.
179050	Nod2	10090	20685341	Nod2 and Nod1 account for neutrophil recruitment to the lungs of mice infected with Legionella pneumophila.
179050	Nod2	10090	17705131	Nod2 and Nod1 activation results in substantial secretion of Ccl5 by murine macrophages and induces binding of NF-kappaB subunits to Ccl5 promoter.
179050	Nod2	10090	21072876	Nod2 and Nod1 can detect Legionella pneumophila and these receptors modulate the in vivo pulmonary immune response differently.
179050	Nod2	10090	21199260	Nod2 is both a positive and negative regulator of Tlr4 - the effect it exerts is dependent on the presence of MDP. Nod2 upon engagement with its ligand, MDP, positively regulates Tlr4-mediated signaling; in the absence of MDP, Nod2 negatively regulates the Tlr4 pathway.
179050	Nod2	10090	21236705	Nod2 is a peripheral peptidoglycan intracellular sensor and is important for the progression and pathogenesis of experimental autoimmune encephalomyelitis (animal model of multiple sclerosis).
179050	Nod2	10090	21108472	Nod2 detects heat-killed Legionella pneumophila and stimulates NFkB and IFN-beta promoter activity. Nod2 deficiency results in increased proinflammatory cytokine expression at 4hrs and greater neutrophil recruitment to the lung.
179050	Nod2	10090	21690088	Ddx58 and Nod2 colocalize to cellular ruffles and cell-cell junctions to form a protein complex via the CARD domains. Ddx58 negatively regulates ligand-induced NFkB signalling mediated by Nod2, and conversely, Nod2 negatively regulates type I interferon induction by Ddx58. (Demonstrated in human)
179050	Nod2	10090	22750073	Nod2 recognition of muramyl dipeptide, a component of bacterial cell walls, improves the barrier function of intestinal epithelial cells.
179050	Nod2	10090	22531915	Nod2 enhances the innate immune response of alveolar macrophages to Mycobacterium tuberculosis in human. (Demonstrated in human)
179050	Nod2	10090	24163408	Nod1 and Nod2 synergize with Tlr4 in dendritic cells to increase IL12 production and enhance invariant natural killer T (iNKT) cell activation, and are important regulators of the IFN gamma response by iNKT cells during S. typhimurium and L. monocytogenes infections.
179050	Nod2	10090	25423082	Salmonella enterica serovar Typhimurium ÎmsbB that possesses a modified lipid A triggers exacerbated colitis in the absence of Nod1 and/or Nod2, which is likely due to increased Tlr2 stimulation.
179050	Nod2	10090	25817335	Nod2 regulates type-1 cytokine responses to Mycobacterium avium but is not required for the control of M. avium infection in vivo.
179050	Nod2	10090	26444420	Leukotriene B4 acts on Nod2 pathway to enhance the immune response against influenza A infection.
205910	Il1a	10090	24022484	Under acidic conditions both pro-inflammatory forms of Il1a and Il1b are regulated independently of the NLRP3 inflammasome.
205910	Il1a	10090	24651866	In response to adenovirus infection, the IL1A-IL1R1-CXCR2 signalling axis cooperates with complement to recruit Ly-6G+7/4+ polymorphonuclear leukocytes to the splenic marginal zone (MZ) in the proximity of virus-containing MARCO+ residential MZ macrophages, which are subsequently eliminated.
205910	Il1a	10090	26536497	NLRP3 inflammasome formation is dispensable for alum-induced innate immunity but Il1a and Il1b are both necessary for alum-induced neutrophil influx in vivo.
205910	Il1a	10090	26439902	Il1a directly senses DNA damage and acts as signal for genotoxic stress without loss of cell integrity.
66482	IL1A	9606	25463072	Interleukin-1 (IL1A/IL1B) plays a key role in the interaction between local vessel wall cells and invading monocytes to multiply cholesterol-triggered inflammation in the vessel wall.
66482	IL1A	9606	25474109	IFNG interferes with the IL-1/NFKBIZ axis in Î²-glucan-activated dendritic cells and promotes T cell-mediated immune responses with increased release of IFNG and IL22, and diminished production of IL17A.
66482	IL1A	9606	25964352	CASP4 is a critical regulator of noncanonical inflammasome activation that initiates defence against bacterial pathogens in primary macrophages by mediating cell death and IL1A release
66482	IL1A	9606	26439902	IL1A directly senses DNA damage and acts as signal for genotoxic stress without loss of cell integrity.
73750	IFIH1	9606	16785313	IFIH1 (MDA5) recognizes distinct RNA viruses and plays a major role in the elimination of RNA viruses in vivo.
73750	IFIH1	9606	15563593	IFIH1 binds V proteins of paramyxoviruses and this inhibit its activation of the IFNB1 (IFN-beta) promoter.
73750	IFIH1	9606	11805321	IFIH1 is a double-stranded RNA-dependent ATPase that contains both a caspase recruitment domain and RNA helicase motifs. IFIH1 may also function as a mediator of interferon (IFN)-induced growth inhibition and/or apoptosis.
73750	IFIH1	9606	20107606	IFIH1 is indispensable for sustained expression of IFN in response to paramyxovirus infection and provide the first evidence of MDA5-dependent containment of in vivo infections caused by (-) sense RNA viruses.
73750	IFIH1	9606	21245317	IFIH1 is an RNA helicase and is a key component in activating the expression of type I IFN in response to viral infection. Viral mRNA with 5' cap and 3' poly(A) from parainfluenza virus 5 is able to activate IFN expression through RNASEL-IFIH1 signalling pathway.
73750	IFIH1	9606	19936053	IFIH1 (MDA5) is responsible for the cytosolic recognition of Legionella pneumophila RNA and the subsequent induction of type I IFN response. (Demonstrated in murine model)
73750	IFIH1	9606	21637773	IFIH1 deficiency results in a delayed type I IFN and attenuated type III IFN response to rhinovirus infection, leading to a transient increase in viral titer. Upon recognition of viral dsRNA, IFIH1 synergizes with TLR3 to induce pro-inflammatory signals leading to airways inflammation and hyper-responsiveness. (Demonstrated in murine model)
73750	IFIH1	9606	23328395	Paramyxovirus V proteins bind to IFIH1 (MDA5) to disrupt viral RNA recognition and induction of antiviral immunity.
73750	IFIH1	9606	24550253	The antisense L region of encephalomyocarditis virus associates with DDX58 and is a key determinant of IFIH1 stimulation of infected cells.
73750	IFIH1	9606	25463548	IFIH1 recognizes hepatitis C virus (HCV) to initiate host interferon response during HCV infection.
73750	IFIH1	9606	26074083	DDX58 is the primary pattern recognition receptor (PRR) for influenza A virus (IAV), but IFIH1 is a significant contributor to the cellular defense against IAV.
73750	IFIH1	9606	25878102	EFTUD2 is a novel innate immune antiviral regulator that restricts hepatitis C virus infection through a DDX58/IFIH1-mediated, JAK-STAT-independent pathway.
54412	EFTUD2	9606	25878102	EFTUD2 is a novel innate immune regulator that restricts hepatitis C virus infection through an RIG-I/MDA5-mediated, JAK-STAT-independent pathway.
54412	EFTUD2	9606	25878102	EFTUD2 is a novel innate immune antiviral regulator that restricts hepatitis C virus infection through a DDX58/IFIH1-mediated, JAK-STAT-independent pathway.
154818	Tlr2	10090	18768838	Tlr2 expression in astrocytes is induced by TNF alpha and NF Kappa B-dependent pathways.
154818	Tlr2	10090	18621910	Tlr2 recognition of Staphylococcal peptidoglycan leads to induction of beta-defensin-2.
154818	Tlr2	10090	19019963	Tlr2 is involved in Respiratory syncytial virus (RSV) recognition and subsequent innate immune activation by promoting neutrophil migration and dendritic cell activation within the lung.
154818	Tlr2	10090	19865078	Tlr4, Tlr2, or Tlr3 cooperate with proteinase-activated receptors (PARs) for activation of nuclear factor-kappaB-dependent signaling in mucosal epithelial cell lines.
154818	Tlr2	10090	9751057	Tlr2 is a signaling receptor that is activated by lipopolysaccharide (LPS) in a response that depends on LPS-binding protein and is enhanced by CD14.
154818	Tlr2	10090	10364168	Tlr2 is a signal transducer for soluble Peptidoglycan and lipoteichoic acid (LTA) in addition to LPS.
154818	Tlr2	10090	10384090	Tlr2 recognizes Gram-positive bacterial cell wall components, leading to the activation of the innate immune system.
154818	Tlr2	10090	10426996	Tlr2 is a molecular link between microbial products, apoptosis, and host defense mechanisms.
154818	Tlr2	10090	20167866	TLR2/MyD88/PI3K/Rac1/Akt pathway mediates the activation of LTA-induced mitogen-activated protein kinases (MAPKs), which in turn initiates the activation of NF-kappaB, and ultimately induces cPLA2/COX-2-dependent PGE2 and IL-6 generation.
154818	Tlr2	10090	20385881	Tlr2 and Tlr4 activate murine macrophages and this is negatively regulated by a Lyn/PI3K module and promoted by SHIP1.
154818	Tlr2	10090	20407745	Tlr2 is a molecular link between increased dietary lipid intake and the regulation of glucose homeostasis, via regulation of energy substrate utilization and tissue inflammation.
154818	Tlr2	10090	20422028	Tlr2 activation induces type I interferon responses from endolysosomal compartments where it is translocated to upon ligand engagement.
154818	Tlr2	10090	20368346	Tlr2 and Myd88-dependent phosphatidylinositol 3-kinase and Rac1 activation facilitates the phagocytosis of Listeria monocytogenes by murine macrophages.
154818	Tlr2	10090	21439957	Tlr1 :: Tlr2 dimeric pairs recognize malarial glycosylphosphatidylinositols (GPI) to initiates intracellular signalling and the production of pro-inflammatory cytokines.
154818	Tlr2	10090	21454596	Tlr2 recognizes Thermus aquaticus extracellular polysacchride, YT-1, and induces the production of cytokines TNF and IL6 in peritoneal macrophages.
154818	Tlr2	10090	21482737	Tlr2::Tlr6 synergistically interacts with Tlr9 in lung epithelium to induce rapid pathogen killing, and can be used as a therapeutic target to treat otherwise lethal pneumonia.
154818	Tlr2	10090	21512004	Tlr2 is activated by gut commensal microbe, Bacteroides fragilis, to establish host-microbial symbiosis by promoting immunological tolerance.
154818	Tlr2	10090	21566133	Tlr2 and Tnfsf11 signalling pathways are modulated by Porphromonas gingivalis to alter the differentiation states of osteoclasts resulting in bacteria-mediated bone loss.
154818	Tlr2	10090	21602496	Tlr2 is expressed by Muller cells, principal glia of retina, and is responsible for generating robust bactericidal activity against Staphylococcus aureusand contributing to retinal innate defence.
154818	Tlr2	10090	21698237	Tlr2 is required for rapid inflammasome activation in response to infection by cytosolic bacterial pathogens such as Francisella novicida.
154818	Tlr2	10090	21862586	Tlr2-driven integration of inducible nitric oxide synthase (iNOS), Wnt-beta-Catenin and Notch1 signalling contributes to its capacity to regulate a battery of genes associated with T regulatory cell lineage commitment and towards modulation of defined set of effector functions in macrophages.
154818	Tlr2	10090	21873606	Tlr2 directly recognizes glycogen, resulting in the activation of immunocytes such as macrophages to enhance the production of nitric oxide and inflammatory cytokines.
154818	Tlr2	10090	22096480	Tlr2 and Tlr4 are crucial for in vivo recognition of Chlamydia pneumoniae. Tlr2/4 double-deficient mice were unable to control pneumonia caused by C. pneumoniae.
154818	Tlr2	10090	22102818	Tlr2 signalling promotes protective vaccine-enhancing Th17 cell responses when cells are stimulated with early secreted antigenic target protein 6 (ESAT-6) expressed by the virulent Mycobacterium tuberculosis strain H37Rv but not by tuberculosis vaccine Bacillus Calmette-GuÃ©rin (BCG).
154818	Tlr2	10090	22174456	Tlr2 recognizes Mycobacterium tuberculosis H37Rv cell surface lipoprotein MPT83, which induces the production of Tnf, Il6, and Il12b cytokines by macrophages and upregulates macrophage function.
154818	Tlr2	10090	22216191	Mycobacterium abscessus glycopeptidolipid (GPL) prevents Tlr2-mediate induction of Il8 and Defb4a in respiratory epithelial cells. (Demonstrated in human)
154818	Tlr2	10090	23994200	Tlr2 is expressed in the enteric nervous system (ENS) and intestinal smooth muscle layers. Its absence induces architectural and neurochemical coding changes in the ENS, leading to gut dysmotility and to higher inflammatory bowel diseases susceptibility
154818	Tlr2	10090	25423082	Salmonella enterica serovar Typhimurium ÎmsbB that possesses a modified lipid A triggers exacerbated colitis in the absence of Nod1 and/or Nod2, which is likely due to increased Tlr2 stimulation.
154818	Tlr2	10090	25505250	Adaptor proteins Ticam1 and Ticam2 have a novel function in Tlr2-mediated signal transduction.
154818	Tlr2	10090	25826367	Retinoic acid treatment enhances Tlr2-dependent Il10 production from T cells and this, in turn, potentiates T regulatory cell generation without the need for activation of antigen presenting cells.
154818	Tlr2	10090	25586105	Proline-proline-glutamic acid 57 (PPE57), located on the mycobacterial cell surface, induces a T helper 1 immune response via Tlr2-mediated macrophage functions.
154818	Tlr2	10090	26078314	Tlr2 is essential for the immune responses to cholera vaccination.
154818	Tlr2	10090	26283364	Staphylococcal superantigen-like protein 3 (SSL3) interferes with Tlr2 activation at two stages. First by binding to Tlr2 and blocking ligand binding and second by interacting with an already formed Tlr2-lipopeptide complex, thus preventing TLR heterodimerization and downstream signalling.
154818	Tlr2	10090	26310831	Peli3 is involved in endotoxin tolerance and functions as a negative regulator of Tlr2/4 signalling.
154818	Tlr2	10090	26423153	Cytokine activation as a result of Tlr2 stimulation is mediated by the phagosomal trafficking molecule Ap3b1 (AP-3).
173348	Ap3b1	10090	21045126	Ap3b1 (AP-3), a lysosome-related organelle trafficking and biogenesis protein, is required for the production of pro-inflammatory cytokines in plasmacytoid dendritic cells upon recognition of viral nucleic acids by endosomal Tlr7 or Tlr9.
173348	Ap3b1	10090	21119105	Ap3b1 is crucial for the trafficking of Tlr9 to specific endosomal compartments for the induction of type I interferon.
173348	Ap3b1	10090	26423153	Cytokine activation as a result of Tlr2 stimulation is mediated by the phagosomal trafficking molecule Ap3b1 (AP-3).
195818	Tlr9	10090	11286707	Tlr9 binds CpG DNA and induces dendritic cell maturation in a MyD88-dependent manner in mice.
195818	Tlr9	10090	19923461	Tlr9 engages in signalling crosstalk with Tlr4 during activation, and as a result, amplifies the inflammatory response of murine macrophages.
195818	Tlr9	10090	17452530	Tlr9, 7, and 3 interact with the endoplasmic reticulum (ER) membrane protein Unc93b and this is essential for proper TLR signaling.
195818	Tlr9	10090	21376231	Tlr9 signalling enhances the rate of acidification of the Salmonella-containing phagosome, and this acidification induces the expression of Salmonella pathogenecity genes that are necessary for intracellular survival, growth, and systemic infection. Tlr9 deficiency rescues the high Salmonella susceptibility phenotype observed in Tlr2,Tlr4 double mutant mice.
195818	Tlr9	10090	21389263	Tlr9 triggers plasmacytoid dendritic cells in Systemic Lupus Erythematosus patients upon recognition of self-antigens such as neutrophil extracellular traps (NETs). (Demonstrated in human)
195818	Tlr9	10090	21402738	Tlr9 requires proteolytic processing in endolysosome by asparagine endopeptidase and cathepsin in the endolysosome to initiate signalling in response to DNA.
195818	Tlr9	10090	21439959	Tlr9 deficiency reduced pancreatic edema, inflammation and pro-Il1b expression in pacreatitis.
195818	Tlr9	10090	21482737	Tlr9 synergistically interacts with Tlr2::Tlr6 in lung epithelium to induce rapid pathogen killing, and can be used as a therapeutic target to treat otherwise lethal pneumonia.
195818	Tlr9	10090	21604257	Tlr9 is proteolytically cleaved in the endosome to form a soluble Tlr9 (sTlr9), which inhibits Tlr9-dependent signalling and contributes to the prevention of autoimmune disease.
195818	Tlr9	10090	21721026	Tlr9 activation is enhanced by increased levels of circulating histones, serving as a crucial link between initial damage and activation of innate immunity during sterile inflammation
195818	Tlr9	10090	21860217	Tlr9 promotes macrophage Hif1a levels, oxidative burst and nitric oxide production in response to group A Streptococcus (GAS), contributing to GAS clearance in vivo in both localized cutaneous and systemic infection models.
195818	Tlr9	10090	21947771	Tlr9 is selectively compartmentalized to fungal phagosomes and negatively modulates macrophage anti-fungal effector functions.
195818	Tlr9	10090	22342842	Tlr9 expression and signalling capacity oscillates with the circadian clock.
195818	Tlr9	10090	22535248	Mitochondrial DNA that escapes from autophagy induces Tlr9 inflammatory responses in cardiomyocytes and is capable of inducing myocarditis and dilated cardiomyopathy.
195818	Tlr9	10090	23071157	TLR9 activation by endogenous self-ligands generated during oxidative stress promotes platelet hyper-reactivity and thrombosis.
195818	Tlr9	10090	23142781	Tlr9 contributes to the control of activated endogenous retroviruses (ERVs) and ERV-induced tumours.
195818	Tlr9	10090	23752491	The N-terminal region of TLR9 is cleaved in the endolysosome to form an intracellular DNA sensor with the C-terminal TLR9.
195818	Tlr9	10090	24270517	Mir126-Kdr axis is an important regulator of the innate response. Mir126 controls the survival and function of plasmacytoid dendritic cells and regulates gene expression of Tlr7, Tlr9, Nfkb1 and Kdr.
195818	Tlr9	10090	25600358	Dnase2a is required for Tlr9 activation by bacterial genomic DNA.
195818	Tlr9	10090	26957214	Tyrosine phosphorylation is essential for Tlr9 protein stability and signalling.
195818	Tlr9	10090	26416273	Tlr9 activation requires a single CpG positioned 4-6 nucleotides from the 5'-end and this activation is augmented by a 5'TCC sequence one to three nucleotides from the CG.
162198	Ifnb1	10090	21408089	Ifnb1 deficiency results in a partial suppression of the sterol pathway in macrophages during viral infections, thereby linking the regulation of lipid metabolism pathway with interferon anti-viral defence responses.
162198	Ifnb1	10090	21602824	Ifnb1 secretion is greater upon viable E. coli infection in comparison to heat killed E. coli vaccine or LPS. The induction of Ifnb1 is dependent on Ticam1-Irf3 signalling.
162198	Ifnb1	10090	22291574	Ifnb1 expression pattern during viral infection is a highly stochastic process influenced by cell-to-cell variability in viral induction processes.
162198	Ifnb1	10090	22912878	Ifnb1 production is fundamental to the efficient control of Listeria monocytogenes during the early innate phase of infection. NK cells treated with Ifnb1 during early infection were able to reduce bacterial titer in the spleen and significantly improve survival of infected mice.
162198	Ifnb1	10090	24656046	The noncanonical NFÎºB pathway regulates histone modifications at the Ifnb1 promoter resulting in attenuated recruitment of Rela and histone demethylase, Kdm4a, to the Ifnb1 promoter. This provides a mechanism for regulating the induction of type I interferons .
162198	Ifnb1	10090	25517615	The innate immune system plays a role in immunogenic tumour recognition. Tumor-cell-derived DNA triggers Ifnb1 production and dendritic cell activation via Tmem173 and Irf3 cytosolic DNA sensing pathways.
162198	Ifnb1	10090	26202980	Ifnb1 selectively restricts the transcriptional responses mediated by both the TLRs and the NOD-like receptors in Salmonella enterica serovar Typhimurium infection in macrophages.
162198	Ifnb1	10090	26416280	Atf3 plays an important role in modulating IFN responses in macrophages by controlling basal and inducible levels of Ifnb1, as well as the expression of genes downstream of IFN signalling.
208712	Atf3	10090	24317040	Atf3 has been identified as a high-density lipoprotein âinducible negative regulator of macrophage activation.
208712	Atf3	10090	26416280	Atf3 plays an important role in modulating IFN responses in macrophages by controlling basal and inducible levels of Ifnb1, as well as the expression of genes downstream of IFN signalling.
178924	Nlrp3	10090	19362020	Nlrp3 mediated immune responses can be activated by RNA and mice lacking Nlrp3, or other inflammasome components, exhibit increased mortality and a reduced immune response after influenza virus exposure.
178924	Nlrp3	10090	19362023	Nlrp3(-/-) mice exhibit increased morbidity after infection with a pathogenic influenza A virus correlating with decreased neutrophil and monocyte recruitment and reduced IL-1beta, IL-18, TNF-alpha, IL-6, KC, MIP2, and IFN-alpha production.
178924	Nlrp3	10090	21278344	Nlrp3 is directly activated by certain antibiotics and plays an important role in the antibiotic-mediated secretion of Il1b. In the case of polymyxin B, Nlrp3 was also required for the neutrophil influx into the peritoneal cavity.
178924	Nlrp3	10090	21289120	Nlrp3 inflammasome is essential for host defence against influenza and other RNA viruses (i.e. EMCV, VSV).
178924	Nlrp3	10090	21385879	Nlrp3 recruits adaptor protein Pycard and Casp1 to form an Nlrp3 inflammasome complex in response to Varicella-Zoster Virus (VZV) infection.
178924	Nlrp3	10090	21439959	Nlrp3 is a component of the inflammasome and is required for inflammation in acute pancreatitis.
178924	Nlrp3	10090	21602824	Nlrp3 is necessary to illicit Il1b response specific to viable, but not heat-killed, E. coli infections.
178924	Nlrp3	10090	22174673	Nlrp3 inflammasome plays a role in innate immune responses against mucosal Candida infection. Nlrp3 limits the severity of infection when present in either the hematopoietic or stromal compartments.
178924	Nlrp3	10090	22295065	Nlrp3/Pycard inflammasome activation following human respiratory syncytial virus infection is dependent on the activation of Tlr2/Myd88/NF-kB and reactive oxygen species/potassium efflux. (Demonstrated in human)
178924	Nlrp3	10090	22984081	MIR223 and EBV miR-BART15 regulate the NLRP3 inflammasome and IL-1beta production.
178924	Nlrp3	10090	23809161	Potassium efflux is a common trigger of NLRP3 Inflammasome activation by bacterial toxins and particulate matter
178924	Nlrp3	10090	24127597	Mitochondrial membrane potential is required for the association of Nlrp3 and Mfn2. Mfns2 is required for the activation of Nlrp3 inflammasomes.
178924	Nlrp3	10090	24265316	3, 4-methylenedioxy-Î²-nitrostyrene is a potent and specific inhibitor of the NLRP3 inflammasome.
178924	Nlrp3	10090	24549849	Both Nlrp3 and Nlrp1a are important regulators of Toxoplasma proliferation and that IL18 signaling is required to mediate host resistance to acute toxoplasmosis.
178924	Nlrp3	10090	24692555	Group B streptococcus induces Il1b, and activates the NLRP3 inflammasome by a mechanism that requires hemolysin-mediated lysosomal leakage, which enhances the interaction of bacterial RNA with NLRP3.
178924	Nlrp3	10090	25689249	Activation of the Nlrp3 inflammasome is detrimental during leishmaniasis. Mice lacking the inflammasome components Nlrp3, Pycard, Casp1 exhibit defective Il1b and Il18 production at the infection site and are resistant to cutaneous Leishmania major infection.
178924	Nlrp3	10090	26045547	Nlrp3 is a novel molecular target for melatonin which requires Rora to blunt the NFkB/ NLRP3 connection during sepsis.
178924	Nlrp3	10090	27214553	Uropathogenic Escherichia coli protein TcpC attenuates activation of the Nlrp3 inflammasome by binding both Nlrp3 and Casp1.
178924	Nlrp3	10090	26305961	Nlrp3 deficiency protects mice from the development of type 1 diabetes by suppressing Th1 responses and impairing T-cell migration to pancreatic islets through the down-regulation of chemokine expression (Ccl5, Cxcl10, Irf1) in islets.
178924	Nlrp3	10090	26341399	Nlrp3 and Casp2 are required for endoplasmic reticulum stress-induced inflammation.
178924	Nlrp3	10090	26416893	Impairment of the mitochondrial electron transport chain by rotenone primes Nlrp3 inflammasome activation upon costimulation with ATP.
63225	IRF3	9606	9463386	IRF3 is a transcription factor that activates type-1 interferon (IFN) and IFN responsive genes.
63225	IRF3	9606	11991981	IRF3 is directly activated after virus infection and functions as a key activator of the intermediate/early alpha/beta interferon (IFN) genes as well as the RANTES chemokine gene.
63225	IRF3	9606	18818105	IRF3 transcription factor induces type I interferons (IFNs) and elicits innate antiviral response. TMEM173 (MITA) is a critical mediator of virus-triggered IRF3 activation and IFN expression.
63225	IRF3	9606	9566918	IRF3 phosphorylation is virus-inducible and results in IRF3 alteration of protein conformation to permit nuclear translocation, association with transcriptional partners, and primary activation of interferon (IFN)- and IFN-responsive genes.
63225	IRF3	9606	21768204	IRF3 is strongly phosphorylated at the late stages of a Sindbis virus infection to mount antiviral responses in human embryonic kidney cells.
63225	IRF3	9606	21820332	IRF3 is involved in the innate immune recognition of Plasmodium falciparum AT-rich DNA and in the subsequent induction of type I IFNs. Mice lacking Irf3/Irf7 are resistant to otherwise lethal cerebral malaria. (Demonstrated in mouse)
63225	IRF3	9606	22170100	IRF3 suppresses neuroinflammation through regulation of immunomodulatory MIR155 microRNA expression in astrocytes.
63225	IRF3	9606	22593165	HIV accessory protein Vpu targets IRF3 to endolysosome for proteolytic degradation to avoid antiviral immune responses.
63225	IRF3	9606	23994473	During the transcriptional response to Sendai virus infection, POLR2F(RNA Pol II) is recruited by IRF3 and NFÎºB to control virus induced gene activation.
63225	IRF3	9606	25352594	Vpu, an accessory protein encoded by HIV-1, contributes to the attenuation of the anti-viral response by partial inactivation of IRF3 while host cells undergo apoptosis.
63225	IRF3	9606	25505063	Hepatitis B virus (HBV) polymerase inhibits TMEM173-stimulated IRF3 activation and IFNB1 induction.
63225	IRF3	9606	25792739	Stimulation of TMEM173-dependent IRF3 activation by ultraviolet radiation is due to apoptotic signalling-dependent disruption of ULK1, a pro-autophagic protein that negatively regulates TMEM173.
63225	IRF3	9606	26046437	PQBP1 directly binds to reverse-transcribed HIV-1 DNA and interacts with MB21D1 to initiate an IRF3-dependent innate response
63225	IRF3	9606	26646986	4-(2-chloro-6-fluorobenzyl)-N-(furan-2-ylmethyl)-3-oxo-3,4-dihydro-2H-benzo[b][1,4]thiazine-6-carboxamide (G10) requires STING to trigger IRF3/IFN-associated transcription in human fibroblasts and subsequently blocking replication of Chikungunya virus, Venezuelan Encephalitis virus, and Sindbis virus.
63225	IRF3	9606	26378160	Influenza B virus induces IRF3 activation and IL29 (IFNL1) gene expression without a requirement for viral protein synthesis or replication and DDX58 is the critical pattern recognition receptor needed for IRF3 activation.
50119	IL29	9606	21499846	IL29 is able to efficiently inhibit Herpes Simplex Virus Type-1 replication in neuronal cells by inducing the expression of TLR as well as activate the TLR-mediated interferon antiviral pathway.
50119	IL29	9606	24041672	IFNL1 (IL29), IFNL2 and IFNL3 have different effects on Toll-like receptor-related gene expression in HepG2 cells.
50119	IL29	9606	26130701	IFN-Î»1 is able to augment TLR-mediated B cell activation, partially attributed to an upregulation of TLR7 expression
50119	IL29	9606	26378160	Influenza B virus induces IRF3 activation and IL29 (IFNL1) gene expression without a requirement for viral protein synthesis or replication and DDX58 is the critical pattern recognition receptor needed for IRF3 activation.
40102	TRAF6	9606	16184196	TRAF6 is an adapter protein linking kinases to TNF receptor, and IL-1 receptor signalling pathways, and also has E3 ubiquitin ligase activity.
40102	TRAF6	9606	18617513	TRAF6 autoubiquitination and its interaction with Ubc13 are dependent on zinc finger 1 (ZF1) motif and an intact RING domain, necessary elements in signalling by IL-1, LPS and RANKL.
40102	TRAF6	9606	18922473	TRAF6 is specifically required for the Smad-independent activation of JNK and p38, and its carboxyl TRAF homology domain physically interacts with TGF-beta receptors that activate JNK and p38 through a mechanism similar to that operating in the interleukin-1beta/Toll-like receptor pathway.
40102	TRAF6	9606	18984593	TRAF6 and MEK kinase 1 (MEKK1) play a pivotal role in the retinoic-acid-inducible gene-I (RIG-I)-like helicase antiviral pathway, where TRAF6 and MEKK1 activate NF-kappaB and mitogen-activated protein kinases via MAVS and this is critical for the optimal induction of type I interferons.
40102	TRAF6	9606	19091594	TRAF6 negatively regulates TNFalpha-induced NF-kappaB activation through its ubiquitin ligase activity.
40102	TRAF6	9606	12140561	TRAF6 regulates several signalling cascades in innate immunity, adaptive immunity and bone homeostasis.
40102	TRAF6	9606	20449947	TRAF6 competes with TRAF2 for CD40 binding to regulate NF-kappaB activation in human B lymphocytes, thereby limiting the capacity of CD40 engagement to induce NF-kappaB activation.
40102	TRAF6	9606	20512936	TRAF6 is autoinhibited by an intramolecular interaction which is counteracted by trans-ubiquitination and TRAF auto-ubiquitination is a means of sustaining an open conformation active in downstream signalling.
40102	TRAF6	9606	20622119	TRAF6 interacts with CSF2RB to mediate NF-kappaB signalling, demonstrating a novel TRAF6-dependent signalling pathway association with a type I cytokine receptor.
40102	TRAF6	9606	21185369	TRAF6 is a E3 ubiquitin ligase that activates NFKB pathway in response to innate and adaptive immunity stimuli. TRAF6 protein contains a highly conserved TRAF-C domain that contributes to oligomerization and its interaction to upstream signalling molecules and a RING domain dimerization interface that is functionally important for ubiquitination and the activation of NFKB.
40102	TRAF6	9606	21220427	TRAF6 is polyubiquitinated and disassembled during endotoxin tolerization; a process which impairs the production of LPS-induced pro-inflammatory cytokines without inhibition expression of anti-inflammatory or anti-microbial mediators.
40102	TRAF6	9606	22033459	TRAF6 is degraded in the proteasome upon TLR stimulation in macrophages. (Demonstrated in mice)
40102	TRAF6	9606	24670424	Following NOD2 activation, IRF4 interacts with MYD88, TRAF6, and RIPK2 and downregulates K63-linked polyubiquitinylation of RICK and TRAF6 leading to disruption of NFkB activation pathways.
40102	TRAF6	9606	24670381	MIR146A is a potent negative regulator of the innate immune response in keratinocytes through downregulation of the IRAK1/TRAF6/NFÎºB pathway.
40102	TRAF6	9606	25027037	STAT1 is directly recruited to TRAF6, demonstrating cross-talk between the TLR and JAK/STAT signalling pathways, and this direct activation of STAT1 by TLR signalling suggests a crucial role for STAT1 in TLR-induced inflammation. Demonstrated in mice.
40102	TRAF6	9606	25371197	ECSIT binds to MAP3K7 and TRAF6 to form a complex that plays a pivotal role in activating TLR4-mediated NF-kB signalling.
40102	TRAF6	9606	26221041	Reversible arginine methylation of TRAF6 is regulated by PRMT1 and JMJD6 and this in turn regulates TRAF6-dependent TLR signalling.
40102	TRAF6	9606	26385923	MAVS directly interacts with TRAF6 through its potential TRAF6-binding motif 2.
49080	MAVS	9606	19036819	MAVS oligomer is essential in the formation of a multiprotein membrane-associated signalling complex that enables downstream activation of IRF3 and NF-kappaB in antiviral innate immunity.
49080	MAVS	9606	16177806	MAVS is a caspase recruitment domain (CARD)-containing adaptor protein that interacts with DDX58 (RIG-I) and recruits CHUK (IKKalpha), IKBKB (IKKbeta) and IKBKE (IKKepsilon) kinases by means of its C-terminal region, leading to the activation of NF-kappaB and IRF3.
49080	MAVS	9606	16125763	MAVS is an adaptor protein that contains an N-terminal caspase recruitment domain (CARD)-like domain and a C-terminal transmembrane domain, both of which are essential for MAVS signalling, while the transmembrane domain also targets MAVS to the mitochondria.
49080	MAVS	9606	20032188	MAVS facilitates cell death by disrupting the mitochondrial membrane potential and by activating caspases.
49080	MAVS	9606	20140199	MAVS-dependent RIG-I-like receptor (RLR) signalling regulates the quantity, quality, and balance of the immune response to West Nile virus (WNV) infection.
49080	MAVS	9606	20451243	MAVS in peroxisomes induces a rapid interferon-independent expression of defence factors that provide short-term protection, whereas mitochondrial MAVS activates an interferon-dependent signalling pathway with delayed kinetics, which amplifies and stabilizes the antiviral response.
49080	MAVS	9606	20554965	MAVS interacts with hepatitis B virus X protein and this promotes the degradation of MAVS via Lys(136) ubiquitination, preventing the induction of IFN-beta.
49080	MAVS	9606	20661427	MAVS (IPS-1) interacts with MFN1 upon virus-infection or 5'ppp-RNA activation through redistribution of MAVS to form speck-like aggregates in cells.
49080	MAVS	9606	20699220	MAVS (IPS1) plays an important role in regulating the host anti-viral response by binding to viral polymerase and inhibiting IFN-beta production.
49080	MAVS	9606	21110072	MAVS negatively regulates the stability of voltage-dependent anion channel 1 (VDAC1) and thereby inhibits apoptosis in the response to release of cytochrome c.
49080	MAVS	9606	21454965	The MAVS signalling pathway in non-myeloid cells is crucial for dsRNA-mediated natural killer cell activation. (Demonstrated in murine model)
49080	MAVS	9606	22844514	Tyrosine phosphorylation of MAVS at amino acid residue Tyr9 is critical for the induction of IFNB signalling.
49080	MAVS	9606	23028806	MAVS mRNA is degraded in response to foreign RNA and poly(I:C) to suppress hyper-immune reaction in late-phase antiviral signalling.
49080	MAVS	9606	23582325	MAVS is required for optimal NLRP3 inflammasome activity by mediating mitochondrial recruitment of NLRP3.
49080	MAVS	9606	23555247	MAVS is targeted by enterovirus protease to evade antiviral immunity.
49080	MAVS	9606	23951545	The binding of MAVS to Traf2, Traf5, and Traf6 is dependent on virus infection and MAVS polymerization. The TRAF proteins promote ubiquitination that recruits IKBKG binding to the MAVS signalling complex.
49080	MAVS	9606	24651600	Upon viral infection, MAVS recruits MKK7 onto mitochondria, leading to the induction of apoptosis by MAP2K7 activated MAPK9
49080	MAVS	9606	25463536	Macrocyclic NS3-4A resistance-associated amino acid variants (RAVs) with substitutions at residue D168 of the hepatitis C virus protease result in an increased capacity of NS3-4A to cleave MAVS and suppress IFNB1 induction.
49080	MAVS	9606	25816776	RNA cleavage products, catalyzed by RNASEL, bind to DHX33 to facilitate the formation of a complex with MAVS and NLRP3 during viral infection.
49080	MAVS	9606	27213432	HACE1 plays an inhibitory role in virus-induced signalling by disrupting the MAVS-TRAF3 complex.
49080	MAVS	9606	26246171	MARCH5 modulates MAVS-mediated antiviral signalling, preventing excessive immune reactions.
49080	MAVS	9606	26385923	MAVS directly interacts with TRAF6 through its potential TRAF6-binding motif 2.
19987	IKBKB	9606	18692471	IKBKB regulates late-phase allergic reactions promoted by the release of pro-inflammatory cytokines in an NF-kappaB-dependent manner.
19987	IKBKB	9606	20627395	Phosphorylated IKBKB is conjugated with a monoubiquitin by the E3 ubiquitin ligase TRIM21 leading to down-regulatioin of IKBKB-induced NF-kappaB signalling. The TRIM21-mediated monoubiquitination is involved in the translocation of active IKBKB to autophagosomes.
19987	IKBKB	9606	21138416	IKBKB and other IKK kinases regulate each other by an intricate network involving phosphorylation of their catalytic and regulatory (NEMO, TANK) subunits to balance their activities during innate immunity.
19987	IKBKB	9606	24323043	GNB2L1 (RACK1) negatively regulates NFÎºB activation by interacting with CHUK and IKBKB. The interaction interferes with the recruitment of the IKK complex to TRAF2 .
19987	IKBKB	9606	26620909	The reversible ubiquitin editing of NLRC5 determines NLRC5â IKBKB interaction dynamics and plays a crucial role in precisely regulating NFÎºB signalling
19987	IKBKB	9606	26394554	Enterovirus 71 2C protein binds to RELA and IKBKB to inhibit NF-kB activation and evade innate immune defenses.
57543	RELA	9606	11980335	RELA, NF-kappaB p65 subunit, is involved in the transcription regulation of many genes including those genes involved in apoptosis, response to stress and inflammation.
57543	RELA	9606	21209118	RELA is a subunit of NFKB and is not essential for virus-stimulated IFNB expression, instead, RELA sustains autocrine IFNB signalling prior to infection. The absence of RELA causes significant delays in IFNB induction and consequently defective secondary antiviral gene expression. RELA maintains autocrine IFNB signalling in uninfected cells, facilitates inflammatory and adaptive immune responses …
57543	RELA	9606	21216972	RELA is critical for pulmonary host defence during Streptococcus pneumoniae pneumonia in alveolar macrophages. During pneumococcal pneumonia, only the earliest induction of cytokines depends on transcription regulated by RELA in myeloid cells, and this transcriptional activity contributes to effective immunity. (Demonstrated in murine model)
57543	RELA	9606	21419662	RELA is required for IL17A production in T cell in response to bacterial infection. RELA deficient T cells resulted in a diminished innate immune response to E. coli infection. (Demonstrated in murine model)
57543	RELA	9606	23271966	A RELA isoform, p43, lacks the transactivation domain but is still able to potentiate anti-viral innate immunity.
57543	RELA	9606	23994473	During the transcriptional response to Sendai virus infection, POLR2F(RNA Pol II) is recruited by IRF3 and NFÎºB to control virus induced gene activation.
57543	RELA	9606	25520509	Paramyxoviruses trigger the DNA-damage response, a pathway required for RPS6KA5 activation of phospho Ser 276 RELA formation to trigger the IRF7-DDX58 amplification loop necessary for mucosal interferon production.
57543	RELA	9606	26055519	Human papillomaviruses impair the acetylation of NFÎºB/RelA K310 in keratinocytes by augmenting the expression of interferon-related developmental regulator 1 (IFRD1) in an EGFR-dependent manner.
57543	RELA	9606	26642243	Haploinsufficiency of A20 (HA20) is caused by high-penetrance loss-of-function germline mutations in TNFAIP3 with increased degradation of NFKBIA, nuclear translocation of RELA, increased expression of NFÎºB mediated proinflammatory cytokines, and defective deubiquitinating activity.
57543	RELA	9606	26296289	MIR223 regulates macrophage function by modulating cytokine production and NF-ÎºB activation through inhibition of RELA phosphorylation and nuclear translocation.
57543	RELA	9606	26394554	Enterovirus 71 2C protein binds to RELA and IKBKB to inhibit NF-kB activation and evade innate immune defenses.
181123	Irf3	10090	21768204	Irf3 is strongly phosphorylated at the late stages of a Sindbis virus infection to mount antiviral responses in human embryonic kidney cells. (Demonstrated in human)
181123	Irf3	10090	21820332	Irf3 is involved in the innate immune recognition of Plasmodium falciparum AT-rich DNA and in the subsequent induction of type I IFNs. Mice lacking Irf3/Irf7 are resistant to otherwise lethal cerebral malaria.
181123	Irf3	10090	22170100	Irf3 suppresses neuroinflammation through regulation of immunomodulatory mmu-mir-155 microRNA expression in astrocytes. (Demonstrated in human)
181123	Irf3	10090	22593165	HIV accessory protein Vpu targets Irf3 to endolysosome for proteolytic degradation to avoid antiviral immune responses. (Demonstrated in human)
181123	Irf3	10090	23028052	Endoplasmic reticulum stress primes macrophages to respond to innate immunity stimuli by activating IRF3.
181123	Irf3	10090	24362933	Plasmodium RNA is a pathogen-associated molecular pattern (PAMP) capable of activating a type I IFN response via the cytosolic pattern recognition receptors Ifih1 and Mavs, as well as via transcription factors Irf3 and Irf7.
181123	Irf3	10090	25431490	Il28ra (Ifnlr1), Stat1 and Irf3 are required for antibiotics to prevent persistent murine norovirus infection.
181123	Irf3	10090	25517615	The innate immune system plays a role in immunogenic tumour recognition. Tumor-cell-derived DNA triggers Ifnb1 production and dendritic cell activation via Tmem173 and Irf3 cytosolic DNA sensing pathways.
181123	Irf3	10090	25642965	Aberrant mitochondrial DNA (mtDNA) packaging promotes escape of mtDNA into the cytosol, where it engages the DNA sensor Mb21d1 and promotes Tmem173-Irf3-dependent signalling to elevate IFN-stimulated gene expression, potentiate type I IFN responses and confer broad viral resistance.
181123	Irf3	10090	26363053	Ppp4c, a serine/threonine phosphatase, directly binds to Tbk1 upon virus infection to dephosphorylate Tbk1 and inhibit Tbk1 activation, and subsequently restrain Irf3 activation, resulting in suppressed production of type I IFN and IFN-stimulated genes.
192882	Tbk1	10090	21820332	Tbk1 is involved in the innate immune recognition of Plasmodium falciparum AT-rich DNA and in the subsequent induction of type I IFNs. Mice lacking Tbk1 are resistant to otherwise lethal cerebral malaria.
192882	Tbk1	10090	22921120	Tbk1 is a key regulator of immunological autophagy and is responsible for autophagosome maturation into bactericidal organelles.
192882	Tbk1	10090	26363053	Ppp4c, a serine/threonine phosphatase, directly binds to Tbk1 upon virus infection to dephosphorylate Tbk1 and inhibit Tbk1 activation, and subsequently restrain Irf3 activation, resulting in suppressed production of type I IFN and IFN-stimulated genes.
209838	Ppp4c	10090	26363053	Ppp4c, a serine/threonine phosphatase, directly binds to Tbk1 upon virus infection to dephosphorylate Tbk1 and inhibit Tbk1 activation, and subsequently restrain Irf3 activation, resulting in suppressed production of type I IFN and IFN-stimulated genes.
204565	Myd88	10090	20881045	Myd88 restricts West Nile virus (WNV) by inhibiting replication in subsets of cells and modulating expression of chemokines that regulate immune cell migration into the central nervous system.
204565	Myd88	10090	20943980	Myd88 signalling plays an important role for resisting primary influenza virus infection but is dispensable for protection against a secondary lethal challenge.
204565	Myd88	10090	21248248	Myd88 is essential in restricting Tlr3 signaling and the host protection from unwanted immunopathologies associated with excessive production of Ifnb1. Myd88 inhibits Tlr3 signalling by impairing Ikbke-mediated induction of Irf3, and consequently the expression of Ifnb1 and Ccl5.
204565	Myd88	10090	21283748	Myd88 is activated by MHC class II in response to staphylococcal enterotoxins and is crucial for the induction of pro-inflammatory cytokines.
204565	Myd88	10090	21325272	MYD88 is a key signalling adapter in TLR signalling. MYD88 aggregates in the cell as distinct foci and co-localizes with IRAK4 in these Myddosomes - the formation of which is required for MYD88 function. (Demonstrated in human)
204565	Myd88	10090	21353603	Myd88 is required in dendritic cells stimulated with Tlr9 ligand for the enhancement of T cell-dependent antibody response. In addition, Myd88 is required in B cells to facilitate strong anti-viral antibody responses.
204565	Myd88	10090	21422180	Myd88 deficient macrophages displayed impaired interaction with fungal yeast cells and produced low levels of pro-inflammatory cytokines. Myd88 signalling is important in the activation of fungicidal mechanisms and the induction of protective innate immune responses against P. brasiliensis.
204565	Myd88	10090	22028692	Myd88 mediates cytoskeletal remodelling and late spreading of lipopolysaccharide (LPS)-stimulated macrophages.
204565	Myd88	10090	22025508	Myd88-dependent recruitment of inflammatory monocytes and dendritic cells to the lungs are key initial cellular responses required for early protection from Burkholderia mallei infection.
204565	Myd88	10090	22386951	Myd88 deficiency results in delayed recruitment of phagocytes and defective production of proinflammatory cytokines in response to Salmonella infection.
204565	Myd88	10090	22491177	Myd88 signalling in intestinal epithelial cells is crucial for the maintenance of gut microbiota homeostasis.
204565	Myd88	10090	22536449	Myd88 mediated production of reactive oxygen species (ROS) is essential for the induction of Il12 by lactic acid bacteria.
204565	Myd88	10090	24442437	Flagellin-specific IgG1 antibody response is induced through a Tlr5-, inflammasome-, and Myd88-independent pathway.
204565	Myd88	10090	24204290	The SF3A/SF3B mRNA splicing complexes regulate the innate immune response in part by regulating Myd88S levels, which modulate the extent of the innate immune response through Tlr4.
204565	Myd88	10090	24375488	Mir149 negatively regulates TLR/Myd88 mediated inflammatory responses in macrophages by targeting Myd88 mRNA.
204565	Myd88	10090	25448706	Myd88 and Ticam1 pathways differently regulate Tlr4-induced immune responses in B cells.
204565	Myd88	10090	25548220	Ticam1 but not Myd88 signalling is critical for the Trl4 protective adjuvant effect in neonates; where Ticam1(-/-) but not Myd88(-/-) neonates are highly susceptible to Escherichia coli peritonitis and bacteremia.
204565	Myd88	10090	25848864	Treml4 is an essential positive regulator of Tlr7 signalling. Treml4(-/-) macrophages are hyporesponsive to Tlr7 agonists and fail to produce type I interferons due to impaired phosphorylation of Stat1 by Mapk14 and decreased recruitment of Myd88 to Tlr7.
204565	Myd88	10090	25808990	Intracellular Sef/IL-17R (SEFIR) domain of Il17rd targets TIR adaptor proteins Myd88, Tirap, Ticam1, Ticam2 and Traf6 to inhibit TLR downstream signalling.
204565	Myd88	10090	26565030	Map1s (Mtap1s) controls bacterial phagocytosis through TLR signalling by interacting directly with Myd88.
204565	Myd88	10090	27196572	Hepatocyte Myd88 affects bile acids, gut microbiota and metabolome contributing to regulation of glucose and lipid metabolism.
204565	Myd88	10090	26363072	Extracellular RNA of cardiac origin exhibits a potent pro-inflammatory property in vitro and in vivo and induces cytokine production through Tlr7-Myd88 signalling.
185532	Tlr7	10090	17452530	Tlr7, 9, and 3 interact with the endoplasmic reticulum (ER) membrane protein UNC93B and this is essential for proper TLR signaling.
185532	Tlr7	10090	21037581	Tlr7 is expressed in C-fiber primary sensory neurons and is important for inducing itch (pruritus), but is not necessary for eliciting mechanical, thermal, inflammatory and neuropathic pain in mice
185532	Tlr7	10090	21282509	Tlr7 signaling pathway plays a pivotal role in fungal pathogen recognition and is essential for the subsequent Ifnb signaling.
185532	Tlr7	10090	21402738	Tlr7 requires proteolytic processing in endolysosome by asparagine endopeptidase and cathepsin in the endolysosome to initiate signalling.
185532	Tlr7	10090	21487111	Tlr7 agonist, such as imidazoquinolines, accumulate in the MHC class II loading compartment - this pH-dependent localization is required for the activation of plasmacytoid dendritic cells. (Demonstrated in human)
185532	Tlr7	10090	21730058	TLR7 inflammatory signalling leads to cardiac fibrosis in autoimmune associated congenital heart block.. (Demonstrated in human)
185532	Tlr7	10090	21734241	Tlr7 and Tlr8 are translocated from the endoplasmic reticulum to the endosome in the presence of antiphospholipid antibodies, as a consequence, plasmacytoid dendritic cells become dramatically sensitized to Tlr7/8 agonists and this may play a role in systemic autoimmunity.
185532	Tlr7	10090	21998589	Tlr7 is responsible for the detection of retroviruses and serves as a key checkpoint controlling the development of germinal center B cells.
185532	Tlr7	10090	22396599	Tlr7 signalling induces autophagy in HIV-infected plasmacytoid dendritic cells; this process is necessary for the induction of IFN-alpha. (Demonstrated in mice)
185532	Tlr7	10090	22753494	Tlr7 binds to exosomal Mir21 and Mir29a secreted by tumour cells and initiates a prometastatic inflammatory response.
185532	Tlr7	10090	22952664	Aberrant TLR7 activation induces Epstein-Barr viral protein LMP1 expression, which exacerbates IFN production in lupus patients. (Demonstrated in human)
185532	Tlr7	10090	23142781	Tlr7 contributes to the control of activated endogenous retroviruses (ERVs) and ERV-induced tumours.
185532	Tlr7	10090	24270517	Mir126-Kdr axis is an important regulator of the innate response. Mir126 controls the survival and function of plasmacytoid dendritic cells and regulates gene expression of Tlr7, Tlr9, Nfkb1 and Kdr.
185532	Tlr7	10090	25848864	Treml4 is an essential positive regulator of Tlr7 signalling. Treml4(-/-) macrophages are hyporesponsive to Tlr7 agonists and fail to produce type I interferons due to impaired phosphorylation of Stat1 by Mapk14 and decreased recruitment of Myd88 to Tlr7.
185532	Tlr7	10090	25917529	Neuronal Tlr7 recognizes endogenous ligands such as the miRNAs Let7c and miR21 and plays a negative role in controlling neuronal growth in a cell-autonomous manner.
185532	Tlr7	10090	26363072	Extracellular RNA of cardiac origin exhibits a potent pro-inflammatory property in vitro and in vivo and induces cytokine production through Tlr7-Myd88 signalling.
134008	Tslp	10090	26371187	Epithelial cell-intrinsic Chuk expression and Tslp regulate group 3 innate lymphoid cell responses required to maintain intestinal barrier immunity.
169132	Chuk	10090	21765415	Chuk has a key role in the negative feedback of NF-kB canonical signalling by orchestrating the assembly of the A20 ubiquitin-editing complex to limit inflammatory gene activation in response to proinflammatory stimuli such as Tnf and Il1.
169132	Chuk	10090	26371187	Epithelial cell-intrinsic Chuk expression and Tslp regulate group 3 innate lymphoid cell responses required to maintain intestinal barrier immunity.
81992	IFIT5	9606	26334375	IFIT5 is a positive regulator in IKK phosphorylation and NF-ÎºB activation.
197036	Stat2	10090	26335850	Transcriptional activation of Adar by IFN occurs in the absence of Stat1 by a non-canonical Stat2-dependent pathway.
153162	Stat1	10090	22065572	Stat1 phosphorylation at Ser708 is a key event in the IFN signalling pathway that imparts anti-viral immunity to restrict West Nile virus infection.
153162	Stat1	10090	22425562	Histone deacetylase inhibitors prevent Ifng-mediated phosphorylation of Stat1. (Demonstrated in human)
153162	Stat1	10090	25431490	Il28ra (Ifnlr1), Stat1 and Irf3 are required for antibiotics to prevent persistent murine norovirus infection.
153162	Stat1	10090	25972472	Cd81 inhibits Rac1/Stat1 activation and negatively regulates the defence mechanisms to Listeria monocytogenes infection.
153162	Stat1	10090	25848864	Treml4 is an essential positive regulator of Tlr7 signalling. Treml4(-/-) macrophages are hyporesponsive to Tlr7 agonists and fail to produce type I interferons due to impaired phosphorylation of Stat1 by Mapk14 and decreased recruitment of Myd88 to Tlr7.
153162	Stat1	10090	26335850	Transcriptional activation of Adar by IFN occurs in the absence of Stat1 by a non-canonical Stat2-dependent pathway.
164791	Adar	10090	21809195	Adar destabalizes RNA structure by the deamination of adenosine to inosine, and therefore is able to disrupt replication of dsRNA viruses in the host.
164791	Adar	10090	26335850	Transcriptional activation of Adar by IFN occurs in the absence of Stat1 by a non-canonical Stat2-dependent pathway.
191912	Ticam1	10090	21454965	The Ticam1 signalling pathway in murine dendritic cells is crucial for dsRNA-mediated natural killer cell activation.
191912	Ticam1	10090	21494017	Ticam1 deficiency results in the impairment of LPS-stimulated TNF-alpha protein translation.
191912	Ticam1	10090	21602824	Ticam1 is crucial for Nlrp3 inflammasome activation in response specific to viable, but not heat-killed, E. coli infections.
191912	Ticam1	10090	21697485	Ticam1 is proteolytically cleaved by Enterovirus 71 to inhibit the induction of innate immunity by Tlr3-signalling. Ticam1 cleavage results in the inhibition of NFkB and IFNB promoter activation. (Demonstrated in human)
191912	Ticam1	10090	21703541	Ticam1 forms a dsRNA sensor complex with components Ddx1, Ddx21 and Dhx36 to trigger the type I interferon and cytokine response to poly I:C, influenza A virus, and reovirus.
191912	Ticam1	10090	21760953	Ticam1 is a potent negative regulator of TLR agonist-triggered immune responses, specifically suppressing Il12 in dendritic cells and Ifng in natural killer cells.
191912	Ticam1	10090	22072781	Ticam1-Tlr3-mediated signalling pathway plays an essential role in the anti-viral response against poliovirus infection.
191912	Ticam1	10090	22124111	Ticam1 plays a role in host resistance to Gram-negative enteropathogens. Ticam1-mediated protective immunity is orchestrated by macrophage-induced IFN-beta and natural killer cell production of IFN-gamma.
191912	Ticam1	10090	22123964	Ticam1 forms a complex with Ripk3 upon Toll-like receptors (TLR) 3 and 4 activation resulting in Ripk3-dependent but TNF-independent necrosis in macrophages.
191912	Ticam1	10090	25389373	High-potency Tlr4 agonists can act as clinically useful vaccine adjuvants by selectively activating Ticam1-dependent immunostimulatory signalling events and only weakly activating potentially harmful Myd88-dependent inflammatory responses.
191912	Ticam1	10090	25448706	Myd88 and Ticam1 pathways differently regulate Tlr4-induced immune responses in B cells.
191912	Ticam1	10090	25505250	Adaptor proteins Ticam1 and Ticam2 have a novel function in Tlr2-mediated signal transduction.
191912	Ticam1	10090	25548220	Ticam1 but not Myd88 signalling is critical for the Trl4 protective adjuvant effect in neonates; where Ticam1(-/-) but not Myd88(-/-) neonates are highly susceptible to Escherichia coli peritonitis and bacteremia.
191912	Ticam1	10090	25736436	Wdfy1 is a crucial adaptor protein in the Tlr3/4 signalling pathway. Wdfy1 interacts with Tlr3 and Tlr4 and mediates the recruitment of Ticam1 to these receptors.
191912	Ticam1	10090	25808990	Intracellular Sef/IL-17R (SEFIR) domain of Il17rd targets TIR adaptor proteins Myd88, Tirap, Ticam1, Ticam2 and Traf6 to inhibit TLR downstream signalling.
191912	Ticam1	10090	26651944	Yersinia pseudotuberculosis type III secretion system effector, YopJ, suppresses Trif(Ticam1)-dependent responses during infection of primary phagocytic cells, including dendritic cells and macrophages.
191912	Ticam1	10090	26351279	Ticam1-dependent type I interferon signalling in T cells is essential to Th1 lineage differentiation and reactivation of memory T cells. Ticam1 activated memory T cells facilitate local neutrophil influx and enhance bacterial elimination.
32341	CAMP	9606	19625657	CAMP represents a potent antimicrobial and cell-stimulating agent, most abundantly expressed in peripheral organs such as lung and skin during inflammation.
32341	CAMP	9606	19748465	CAMP, a protein that has direct antimicrobial activity, serves as a mediator of vitamin D3-induced autophagy.
32341	CAMP	9606	19812202	CAMP (LL-37) modulates IFN-gamma responses during both the innate and adaptive phases of immune responses, indicating an immunomodulatory role for this endogenous peptide.
32341	CAMP	9606	19797203	CAMP has both antimicrobial and regenerative capabilities and promotes high glucose-attenuated epithelial wound healing via EGFR transactivation in organ cultured corneas.
32341	CAMP	9606	18923446	CAMP is involved in various aspects of skin biology, including protection against infection, wound healing, and also in psoriasis where it suppresses apoptosis in keratinocytes.
32341	CAMP	9606	18397922	CAMP induces endothelium-dependent relaxation in human omental veins, or vasodilation, mediated via an effect on endothelial ALX.
32341	CAMP	9606	20042575	CAMP enhances delivery of CpG oligodeoxynucleotides to stimulate immune cells and this is independent of its amphipathic structure and its bactericidal property.
32341	CAMP	9606	20036634	CAMP has dual function as an antimicrobial agent against bacterial target cells and a cell penetrating peptide that can deliver nucleic acids into the host cells.
32341	CAMP	9606	20163451	CAMP decreases collagen expression at mRNA and protein levels in human dermal fibroblasts (HDFs) and this inhibition is dependent on phosphorylation of extracellular signal-regulated kinase (ERK). Vitamin C attenuates ERK signalling to inhibit the regulation of collagen production by CAMP in HDFs.
32341	CAMP	9606	20190140	CAMP and human beta-defensins (hBDs) antimicrobial peptides induce the secretion of a pruritogenic cytokine IL-31 by human mast cells.
32341	CAMP	9606	20610648	CAMP (LL37) directs macrophage differentiation toward macrophages with a pro-inflammatory signature and this requires internalization of the peptide, resulting in low production of IL-10 and profound production of IL-12p40 upon LPS stimulation.
32341	CAMP	9606	19703986	CAMP (LL37) converts self-RNA into a trigger of TLR7 and TLR8 in human dendritic cells (DC), leading to production of TNF-alpha and IL6 and the differentiation of myeloid DCs into mature DCs.
32341	CAMP	9606	21393634	CAMP (LL-37) attenuates lethal sepsis/endotoxin shock by suppressing the LPS-induced apoptosis of vascular and hepatic endothelial cells. LL-37 was found to inhibit the binding of LPS to the LPS receptors expressed on the cells.
32341	CAMP	9606	21389264	CAMP (LL37) is found in high concentrations within neutrophil extracellular traps (NETs). CAMP is a neutrophil protein that facilitates the uptake and recognition of mammalian DNA by plasmacytoid dendritic cells, and may play a role in Systemic Lupus Erthermatosus autoimmunity.
32341	CAMP	9606	21441450	CAMP (LL-37) dramatically reduced TNFA and nitric oxide levels produced by LPS and IFNG-polarized M1 macrophages, in addition LL-37-treated M1 macrophages were more efficient at suppressing tumour growth in vitro. This demonstrates the selective ability of LL-37 to decrease production of LPS-induced pro-inflammatory cytokines in macrophages, while leaving other crucial anti-inflammatory M1 and M2…
32341	CAMP	9606	21448240	CAMP (LL-37), at sufficiently low concentrations, is able to reduce fungal infectivity by inhibiting C. albicans adhesion to plastic surfaces, oral epidermoid cells, and the urinary bladders of female mice. The inhibitory effects of LL-37 on cell adhesion and aggregation were mediated by its preferential binding to mannan and chitin in the fungal cell wall.
32341	CAMP	9606	21464330	CAMP (LL-37) translocates across the E. coli outer membrane and halts bacterial growth by interfering cell wall biogenesis.
32341	CAMP	9606	21562230	CAMP (LL-37) confers protective immunity against psoriasis by neutralizing cytosolic DNA in keratinocytes and blocking the formation of AIM2 inflammasomes.
32341	CAMP	9606	21762664	CAMP protects against colitis induction in mice. The increased expression of CAMP in monocytes involves the activation of TLR9/ERK signalling pathway by bacterial DNA. (Demonstrated in mouse)
32341	CAMP	9606	21832078	CAMP expression is induced upon endoplasmic reticulum stress via NF-kB-C/EBP-alpha activation.
32341	CAMP	9606	22031815	LL-37 (CAMP) reduces influenza A viral load and disease severity in mice.
32341	CAMP	9606	23328115	CAMP (LL-37) is downregulated during septic shock.
32341	CAMP	9606	26113114	(S)-methyl 2-(hexanamide)-3-(4-hydroxyphenyl) propanoate (MHP) activates SPHK1 to stimulate CAMP production and enhance epidermal antimicrobial defence.
32341	CAMP	9606	25884905	Cleavage of CAMP by cathepsins CTSS and CTSK impairs its antimicrobial activity against Pseudomonas aeruginosa and Staphylococcus aureus.
32341	CAMP	9606	26878866	Carbamylation of CAMP affects its bactericidal, cytotoxic and immunomodulatory function.
32341	CAMP	9606	26351280	CAMP modulates the response of macrophages during mycobacterial infection controlling the expression of pro-inflammatory and anti-inflammatory cytokines.
141522	Casp2	10090	26341399	Nlrp3 and Casp2 are required for endoplasmic reticulum stress-induced inflammation.
207066	Mavs	10090	21454965	The Mavs signalling pathway in non-myeloid cells is crucial for dsRNA-mediated natural killer cell activation.
207066	Mavs	10090	22844514	Tyrosine phosphorylation of Mavs at amino acid residue Tyr9 is critical for the induction of Ifnb signalling. (Demonstrated in human)
207066	Mavs	10090	23499490	Upon infection with encephalitic Bunyavirus, RIG-I/MAVS signalling activates SARM1 to mediate neuronal cell death.
207066	Mavs	10090	23754752	MAVS binds to VDAC1 to trigger viral-induced apoptosis.
207066	Mavs	10090	24362933	Plasmodium RNA is a pathogen-associated molecular pattern (PAMP) capable of activating a type I IFN response via the cytosolic pattern recognition receptors Ifih1 and Mavs, as well as via transcription factors Irf3 and Irf7.
207066	Mavs	10090	26079065	Antiviral response to rotavirus in infected macrophages is fully Mavs-dependent.
207066	Mavs	10090	25897172	Alveolar macrophages detect respiratory syncytial virus (RSV) via the Mavs /Ddx58 pathway and are a major source of type I interferons upon RSV infection.
207066	Mavs	10090	26633895	Transgenic picornavirus RNA-dependent RNA polymerase (RdRP) expression in mice produces a quantitatively dramatic, sustained, effective antiviral interferon-stimulated genes (ISG) network, which requires the MDA5-MAVS pathway.
207066	Mavs	10090	26246171	March5 modulates Mavs-mediated antiviral signalling, preventing excessive immune reactions.
207066	Mavs	10090	26348439	Baiap2l1 recruits Ube2i to sumoylate Pcbp2, which causes its cytoplasmic translocation during viral infection and the sumoylated Pcbp2 associates with Mavs to initiate its degradation, leading to downregulation of antiviral responses.
188762	Pcbp2	10090	22105485	Pcbp2 synergizes with Pcbp1 in Mavs inhibition but Pcbp2 shows low basal expression with rapid induction after infection while Pcbp1 is stably and abundantly expressed. (Demonstrated in human)
188762	Pcbp2	10090	26348439	Baiap2l1 recruits Ube2i to sumoylate Pcbp2, which causes its cytoplasmic translocation during viral infection and the sumoylated Pcbp2 associates with Mavs to initiate its degradation, leading to downregulation of antiviral responses.
151396	Ube2i	10090	26348439	Baiap2l1 recruits Ube2i to sumoylate Pcbp2, which causes its cytoplasmic translocation during viral infection and the sumoylated Pcbp2 associates with Mavs to initiate its degradation, leading to downregulation of antiviral responses.
208134	Baiap2l1	10090	26348439	Baiap2l1 recruits Ube2i to sumoylate Pcbp2, which causes its cytoplasmic translocation during viral infection and the sumoylated Pcbp2 associates with Mavs to initiate its degradation, leading to downregulation of antiviral responses.
69618	CASP1	9606	15039421	CASP1 activates NF-kappaB independent of its enzymatic activity and contributes to inflammation by proteolysis of pro-IL1B (IL-1 beta) and RIPK2 activation of NF-kappaB and MAPK1.
69618	CASP1	9606	19124602	CASP1 is part of the inflammasome complex, along with pathogen-specific nucleotide oligomerization and binding domain (NOD)-like receptors (NLRs) and in some cases the scaffolding protein ASC. Formation of the membrane-associated inflammasome complex in murine macrophages, results in cleavage of cytosolic CASP1 substrates and cell death.
69618	CASP1	9606	20823203	CASP1 activity is required for discrimination between translocon-positive and -negative bacteria in bone-marrow derived cells and interleukin-1 receptor signalling. Activation of CASP1 by bacteria expressing Type 3 secretion systems allows for rapid recognition of bacteria expressing conserved functions associated with virulence.
69618	CASP1	9606	21057511	CASP1 clears intracellular bacteria in vivo independently of IL1B (IL-1-beta) and IL18 and establishes pyroptosis as an efficient mechanism of bacterial clearance by the innate immune system. CASP1-induced pyroptotic cell death releases bacteria from macrophages and exposes the bacteria to uptake and killing by reactive oxygen species in neutrophils.
69618	CASP1	9606	21439959	CASP1 is a component of the inflammasome and is required for inflammation in acute pancreatitis. (Demonstrated in murine model)
69618	CASP1	9606	21602824	CASP1-dependent inflammatory cell death, or pyroptosis, is only induced by viable, but not heat-killed, E. coli. (Demonstrated in murine model)
69618	CASP1	9606	22833538	Naturally occurring variants of CASP1 differ considerably in structure and the ability to activate IL1B.
69618	CASP1	9606	24481253	The precursor and mature forms of IL37 are secreted from activated cells upon inflammasome activation and CASP1 processing of IL37 is important for its anti-inflammatory activity.
69618	CASP1	9606	26324708	20-kDa IL1B generated from CASP1 cleaved pro-IL1B limits the available pro-IL1B for generation of CASP1 cleaved 17-kDa IL1B, thus reducing inflammation.
66519	IL1B	9606	20195505	IL1B is an important proinflammatory cytokine that activates monocytes, macropages, and neutrophils. IL1B processing during infection is a complex process in which the inflammasomes are only one of several activation mechanisms.
66519	IL1B	9606	20401526	Mature IL1B production requires, in addition to the synthesis of pro-IL1B, cleavage of the precursor protein by the inflammatory CASP1 (Caspase-1) which is controlled within the NLRP3 inflammasome.
66519	IL1B	9606	20620944	IL1B-producing conventional dendritic cells preserves and expands IL-22(+)AHR(+) immature human natural killer cells in the secondary lymphoid tissue.
66519	IL1B	9606	21170027	IL1B acts as a growth factor for neutrophil progenitors and as a survival factor for mature neutrophils. In the absence of IKBKB, the IL1B production is enhanced and provides a compensatory mechanism for maintaining antibacterial defense when NFKB is inhibited. (Demonstrated in murine model)
66519	IL1B	9606	21228274	IL1B secretion in macrophages is regulated by autophagy by two mechanisms; sequestering of pro-IL1B in autophagosome during TLR stimulation, and processing,secretion of IL1B in a NLRP3- and TRIF-dependent manner.
66519	IL1B	9606	21602824	IL1B secretion is induced only during viable E. coli infection (as oppose to heat-killed E. coli or LPS); Viable bacteria specifically elicit cleavage of pro-IL1B. (Demonstrated in murine model)
66519	IL1B	9606	21270399	IL1B derived from alveolar macrophages is the critical mediator which induces chemokine production in non-hematopoietic cells in the lung, resulting in swift and robust recruitment of infection-controlling neutrophils into the airways. (Demonstrated in murine model)
66519	IL1B	9606	21628463	IL1B secretion is tightly regulated by the redox status in myeloid cells. TLR engagement in monocytes induces ROS generation followed by a sustained antioxidant response and efficient IL1B secretion. In macrophages, the antioxidant systems are in an upregulated state, and therefore buffers the TLR induction of the redox response, which results in low IL1B processing and secretion.
66519	IL1B	9606	22158745	IL1B is an important component of the cellular network involving macrophages and epithelial cells, which facilitates IL8 chemokine expression and aids neutrophil recruitment during pneumococcal pneumonia.
66519	IL1B	9606	22426547	IL1B is an inflammatory cytokine that binds to its primary receptor, IL1R1, that then recruits the accessory protein IL1RAP to form a signalling-competent heterotrimeric complex.
66519	IL1B	9606	24277153	TLR8 plays a pathogenic role in disease whereby its expression is increased in patients with systemic arthritis and is correlated with the elevation of IL1B levels and disease status.
66519	IL1B	9606	24323452	Protein-bound polysaccharide-K can activate the NLRP3 inflammasome and induce IL1B in a TLR2- and NLRP3-dependent manner.
66519	IL1B	9606	25463072	Interleukin-1 (IL1A/IL1B) plays a key role in the interaction between local vessel wall cells and invading monocytes to multiply cholesterol-triggered inflammation in the vessel wall.
66519	IL1B	9606	25474109	IFNG interferes with the IL-1/NFKBIZ axis in Î²-glucan-activated dendritic cells and promotes T cell-mediated immune responses with increased release of IFNG and IL22, and diminished production of IL17A.
66519	IL1B	9606	25964352	CASP4 is a critical regulator of noncanonical inflammasome activation that initiates defence against bacterial pathogens in primary macrophages by mediating cell death and IL1A release
66519	IL1B	9606	25637949	DEFB103A and RNASE7 are induced in human umbilical endothelial cells (HUVECs) by classical inflammatory cytokines such as: IFNG, IL1B and TNF.
66519	IL1B	9606	26032420	Antibody-dependent enhancement (ADE) of Dengue virus serotype 2 (DENV-2) elevates mature IL1B secretion via SYK signalling pathway in primary monocytes.
66519	IL1B	9606	26187413	Differentiation of Type 3 innate lymphoid cells (ILC3) to IL7R(+) ILC1 is reversible whereas IL7R(+) ILC1 can differentiate to ILC3 in the presence of IL2, IL23A, and IL1B dependent on the transcription factor RORC, and this process is enhanced in the presence of retinoic acid.
66519	IL1B	9606	26324708	20-kDa IL1B generated from CASP1 cleaved pro-IL1B limits the available pro-IL1B for generation of CASP1 cleaved 17-kDa IL1B, thus reducing inflammation.
82738	TLR4	9606	18326860	TLR4 is activated by LPS and this recognition activates the Src family kinases, Src, Fyn and Yes, which in turn contribute to tyrosine phosphorylation of Zonula adherens proteins to open the endothelial paracellular pathway.
82738	TLR4	9606	15852007	TLR4 binding to microbial ligands can be inhibited by CD180 and its helper molecule, LY86, via direct interactions with the TLR4 signalling complex.
82738	TLR4	9606	10196138	TLR4 is involved in lipopolysaccharide (LPS) signaling and serves as a cell-surface co-receptor for CD14, leading to LPS-mediated NF-kappaB activation and subsequent cellular events.
82738	TLR4	9606	20037584	TLR4-TLR6-Cd36 activation is a common molecular mechanism by which atherogenic lipids and amyloid-beta stimulate sterile inflammation.
82738	TLR4	9606	20133493	TLR4 dimerize and enable rapid signal transduction against LPS stimulation on membrane-associated CD14-expressing cells.
82738	TLR4	9606	20360853	TLR4 and TLR9 have both non-redundant and cooperative roles in lung innate responses during Gram-negative bacterial pneumonia and are both critical for IL-17 driven antibacterial host response.
82738	TLR4	9606	20826541	TLR4 mediates LPS-induced muscle catabolism via coordinate activation of the ubiquitin-proteasome and the autophagy-lysosomal pathways. TLR4 activation by LPS induces C2C12 myotube atrophy via up-regulating autophagosome formation and the expression of ubiquitin ligase atrogin-1/MAFbx and MuRF1.
82738	TLR4	9606	21442393	TLR4 transfection of eukaryotic host cells using bacterial vectors, or bactofection, was shown to reduce E. coli colonization in the kidney and the bladder in an animal model of urinary tract infection. (Demonstrated in murine model)
82738	TLR4	9606	21464300	TLR4 is involved in the transmission of ER stress from tumour cells to macrophages, promoting a pro-inflammatory program in the tumour microenvironment, thus facilitating tumour progression. (Demonstrated in murine model)
82738	TLR4	9606	21518783	TLR4 deficient murine macrophages results in the complete abrogation of TNF-alpha production during Leishmania panamensis infection. The endosomal TLR4 plays a crucial role in the activation of host macrophages and controlling the early stages of parasitic infection. (Demonstrated in murine model)
82738	TLR4	9606	21615666	Epithelial TLR4 activation facilitates the transcytosis of non-cytolytic uropathogenic E. coli across intact collecting duct cell layers to invade the renal interstitium in experimental urinary tract infections.
82738	TLR4	9606	21712422	TLR4:LY96 functions as intracellular LPS sensor and triggers a unique set of LPS responses upon recognition of phagocytosed bacteria in macrophages. (Demonstrated in murine model)
82738	TLR4	9606	21730052	TLR4 on dendritic cell surfaces binds to HSPA14 and induces a robust Th1 response via the MAPK and NFkB signalling pathways. (Demonstrated in mouse)
82738	TLR4	9606	21738466	TLR4 recognizes Clostridium difficile surface layer proteins and induces the maturation of dendritic cells to activate the innate and adaptive immune response. (Demonstrated in mouse)
82738	TLR4	9606	21775438	TLR4 and HSPD1 mediate myocardial ischemia-activated innate immune signalling, which plays an important role in mediating apoptosis and inflammation during ischemia/reperfusion (I/R). (Demonstrated in murine model)
82738	TLR4	9606	22096480	TLR4 and TLR2 are crucial for in vivo recognition of Chlamydia pneumoniae. Tlr4/2 double-deficient mice were unable to control pneumonia caused by C. pneumoniae. (Demonstrated in mice)
82738	TLR4	9606	22354030	TLR4 translocates to membrane lipid rafts in a ceramide-dependent manner in Helicobacter pylori infected gastric epithelial cells.
82738	TLR4	9606	22396536	TLR4 is involved in cell-cell contact signalling between activated apoptotic lymphocytes and dendritic cells (DC) during the maturation of DCs.
82738	TLR4	9606	22433865	Synthetic triacylated lipid A-molecules have the potent ability to selectively antagonize TLR4 and inhibit anti-bacterial immunity.
82738	TLR4	9606	22593572	The poxviral protein A46 directly inhibits TLR4 signalling by disrupting receptor complex formation.
82738	TLR4	9606	22962435	A human TLR4 polymorphism (D299G/T399I) impairs TLR4::LY96 dimerization and results in a dampened host response to bacterial lipids.
82738	TLR4	9606	22951730	TLR4 is an important regulator of wound inflammation and is essential for early skin wound healing. (Demonstrated in mice)
82738	TLR4	9606	24265315	TIR domain-contaning protein from Brucella melitensis, TcpB, disrupts the receptor-adaptor interaction between TLR4 and TIRAP.
82738	TLR4	9606	25371197	ECSIT binds to MAP3K7 and TRAF6 to form a complex that plays a pivotal role in activating TLR4-mediated NF-kB signalling.
82738	TLR4	9606	25505274	The TLR4/S100A8 axis is important in the activation of monocytes.
82738	TLR4	9606	26082489	Endotoxin tolerance re-programs TLR4 signalling via suppression of PELI1, a positive regulator of MyD88- and TIR domain-containing adapter inducing IFN-Î² (TRIF)-dependent signalling that promotes K63-linked polyubiquitination of IRAK1, TBK1, and TAK1.
82738	TLR4	9606	26610398	H. pylori infection induces the expression and activation of components of NLRP3 inflammasomes in neutrophils and this activation is independent of a functional type IV secretion system, TLR2 and TLR4.
82738	TLR4	9606	26310831	PELI3 is involved in endotoxin tolerance and functions as a negative regulator of TLR2/4 signalling.
41789	TLR2	9606	20505832	TLR2 plays a critical role in the ability of innate immunity to determine M. pulmonis numbers in the lung, and early after respiratory infection TLR2 recognition of M. pulmonis triggers initial cytokine responses of host cells.
41789	TLR2	9606	20927103	TLR2 functions as a sensor of oxidation-associated molecular patterns, providing a key link connecting inflammation, oxidative stress, innate immunity and angiogenesis.
41789	TLR2	9606	21439957	TLR1 :: TLR2 dimeric pairs recognize malarial glycosylphosphatidylinositols (GPI) to initiates intracellular signalling and the production of pro-inflammatory cytokines.
41789	TLR2	9606	21454596	TLR2 recognizes Thermus aquaticus extracellular polysacchride, YT-1, and induces the production of cytokines TNF and IL6 in peritoneal macrophages. (Demonstrated in murine model)
41789	TLR2	9606	21482737	TLR2::TLR6 synergistically interacts with TLR9 in lung epithelium to induce rapid pathogen killing, and can be used as a therapeutic target to treat otherwise lethal pneumonia.
41789	TLR2	9606	21512004	TLR2 is activated by gut commensal microbe, Bacteroides fragilis, to establish host-microbial symbiosis by promoting immunological tolerance. (Demonstrated in murine model)
41789	TLR2	9606	21566133	TLR2 and TNFSF11 signalling pathways are modulated by Porphromonas gingivalis to alter the differentiation states of osteoclasts resulting in bacteria-mediated bone loss. (Demonstrated in murine model)
41789	TLR2	9606	21602496	TLR2 is expressed by Muller cells, principal glia of retina, and is responsible for generating robust bactericidal activity against Staphylococcus aureus and contributing to retinal innate defence.
41789	TLR2	9606	21698237	TLR2 is required for rapid inflammasome activation in response to infection by cytosolic bacterial pathogens such as Francisella novicida. (Demonstrated in murine model)
41789	TLR2	9606	21862586	TLR2-driven integration of inducible nitric oxide synthase (iNOS), Wnt-beta-Catenin and NOTCH1 signalling contributes to its capacity to regulate a battery of genes associated with T regulatory cell lineage commitment and towards modulation of defined set of effector functions in macrophages. (Demonstrated in murine model)
41789	TLR2	9606	21873606	TLR2 directly recognizes glycogen, resulting in the activation of immunocytes such as macrophages to enhance the production of nitric oxide and inflammatory cytokines.
41789	TLR2	9606	22096480	TLR2 and TLR4 are crucial for in vivo recognition of Chlamydia pneumoniae. Tlr2/4 double-deficient mice were unable to control pneumonia caused by C. pneumoniae. (Demonstrated in mice)
41789	TLR2	9606	22102818	TLR2 signalling promotes protective vaccine-enhancing Th17 cell responses when cells are stimulated with early secreted antigenic target protein 6 (ESAT-6) expressed by the virulent Mycobacterium tuberculosis strain H37Rv but not by tuberculosis vaccine Bacillus Calmette-GuÃ©rin (BCG). (Demonstrated in mice)
41789	TLR2	9606	22174456	TLR2 recognizes Mycobacterium tuberculosis H37Rv cell surface lipoprotein MPT83, which induces the production of TNF, IL6, and IL12B cytokines by macrophages and upregulates macrophage function. (Demonstrated in mouse)
41789	TLR2	9606	22216191	Mycobacterium abscessus glycopeptidolipid (GPL) prevents TLR2-mediate induction of IL8 and DEFB4A in respiratory epithelial cells.
41789	TLR2	9606	25353353	Interaction of filamentous hemagglutinin (FHA) with TLR2 induces an innate immune response against Bordetella pertussis and the TLR2-binding domain of FHA may contribute to immunoprotection against pertussis infection.
41789	TLR2	9606	25456159	Cutaneous bacteria can negatively regulate skin-driven immune responses by inducing Gr1(+)CD11b(+) myeloid-derived suppressor cells via TLR2-6 activation.
41789	TLR2	9606	25531754	Soluble TLR2 (sTLR2) generated by metalloproteinase activation inhibits TLR2-induced cytokine production in THP-1 cell line.
41789	TLR2	9606	25977263	TLR10 is a functional receptor involved in the innate immune response to H. pylori infection and the TLR2/TLR10 heterodimer functions in H. pylori lipopolysaccharide recognition.
41789	TLR2	9606	25955717	Human Cytomegalovirus (HCMV) miR-UL112-3p efficiently targets TLR2 during HCMV infection, resulting in the inhibition of TLR2-mediated NFÎºB signalling.
41789	TLR2	9606	26610398	H. pylori infection induces the expression and activation of components of NLRP3 inflammasomes in neutrophils and this activation is independent of a functional type IV secretion system, TLR2 and TLR4.
41789	TLR2	9606	26283364	Staphylococcal superantigen-like protein 3 (SSL3) interferes with TLR2 activation at two stages. First by binding to TLR2 and blocking ligand binding and second by interacting with an already formed TLR2-lipopeptide complex, thus preventing TLR heterodimerization and downstream signalling.
41789	TLR2	9606	26310831	PELI3 is involved in endotoxin tolerance and functions as a negative regulator of TLR2/4 signalling.
59060	PELI3	9606	17997719	PELI3 and other pellino isoforms are the E3 ubiquitin ligases that mediate the IL-1-stimulated formation of K63-pUb-IRAK1 in cells, which may contribute to the activation of IKBKB and NF-kappaB, as well as other signalling pathways dependent on IRAK1 and IRAK4.
59060	PELI3	9606	25483963	Autophagy causes PELI3 degradation during Tlr4-signalling, subsequently inhibiting Il1b expression and impairing the hyperinflammatory phase during sepsis.
59060	PELI3	9606	26310831	PELI3 is involved in endotoxin tolerance and functions as a negative regulator of TLR2/4 signalling.
156729	Tlr4	10090	19923461	Signaling crosstalk during sequential Tlr4 and Tlr9 activation amplifies the inflammatory response of mouse macrophages.
156729	Tlr4	10090	20385881	Tlr4 and Tlr2 activate murine macrophages and this activation is negatively regulated by a Lyn/PI3K module and promoted by SHIP1.
156729	Tlr4	10090	21442393	Tlr4 transfection of eukaryotic host cells using bacterial vectors, or bactofection, was shown to reduce E. coli colonization in the kidney and the bladder in an animal model of urinary tract infection.
156729	Tlr4	10090	21464300	Tlr4 is involved in the transmission of ER stress from tumour cells to macrophages, promoting a pro-inflammatory program in the tumour microenvironment, thus facilitating tumour progression.
156729	Tlr4	10090	21518783	Tlr4 deficient murine macrophages results in the complete abrogation of TNF-alpha production during Leishmania panamensis infection. The endosomal Tlr4 plays a cruical role in the activation of host macrophages and controlling the early stages of parasitic infection.
156729	Tlr4	10090	21615666	Epithelial Tlr4 activation facilitates the transcytosis of non-cytolytic uropathogenic E. coli across intact collecting duct cell layers to invade the renal interstitium in experimental urinary tract infections.
156729	Tlr4	10090	21712422	Tlr4:Ly96 functions as intracellular LPS sensor and triggers a unique set of LPS responses upon recognition of phagocytosed bacteria in macrophages.
156729	Tlr4	10090	21730052	Tlr4 on dendritic cell surfaces binds to Hspa14 and induces a robust Th1 response via the MAPK and NFkB signalling pathways.
156729	Tlr4	10090	21738466	Tlr4 recognizes Clostridium difficile surface layer proteins and induces the maturation of dendritic cells to activate the innate and adaptive immune response.
156729	Tlr4	10090	21775438	Tlr4 and Hspd1 mediate myocardial ischemia-activated innate immune signalling, which plays an important role in mediating apoptosis and inflammation during ischemia/reperfusion (I/R).
156729	Tlr4	10090	22096480	Tlr4 and Tlr2 are crucial for in vivo recognition of Chlamydia pneumoniae. Tlr4/2 double-deficient mice were unable to control pneumonia caused by C. pneumoniae.
156729	Tlr4	10090	22354030	Tlr4 translocates to membrane lipid rafts in a ceramide-dependent manner in Helicobacter pylori infected gastric epithelial cells. (Demonstrated in human)
156729	Tlr4	10090	22396536	Tlr4 is involved in cell-cell contact signalling between activated apoptotic lymphocytes and dendritic cells (DC) during the maturation of DCs. (Demonstrated in human)
156729	Tlr4	10090	22433865	Synthetic triacylated lipid A-molecules have the potent ability to selectively antagonize Tlr4 and inhibit anti-bacterial immunity. (Demonstrated in human)
156729	Tlr4	10090	22593572	The poxviral protein A46 directly inhibits Tlr4 signalling by disrupting receptor complex formation. (Demonstrated in human)
156729	Tlr4	10090	22962435	A human TLR4 polymorphism (D299G/T399I) impairs TLR4::LY96 dimerization and results in a dampened host response to bacterial lipids. (Demonstrated in human)
156729	Tlr4	10090	22951730	Tlr4 is an important regulator of wound inflammation and is essential for early skin wound healing.
156729	Tlr4	10090	24101501	Milk oligosaccharide sialyl(Î±2,3)lactose modulates mucosal immunity by inducing inflammation through TLR4 signaling
156729	Tlr4	10090	24423728	Itgam (Cd11b) fine tunes the balance between adaptive and innate immune responses initiated by LPS by modulating the trafficking and signalling functions of Tlr4 in a cell-type-specific manner.
156729	Tlr4	10090	24163408	Nod1 and Nod2 synergize with Tlr4 in dendritic cells to increase IL12 production and enhance invariant natural killer T (iNKT) cell activation, and are important regulators of the IFN gamma response by iNKT cells during S. typhimurium and L. monocytogenes infections.
156729	Tlr4	10090	25022365	Rab8a interacts with Pik3cg to regulate Akt signalling generated by surface Tlr4.
156729	Tlr4	10090	25389373	High-potency Tlr4 agonists can act as clinically useful vaccine adjuvants by selectively activating Ticam1-dependent immunostimulatory signalling events and only weakly activating potentially harmful Myd88-dependent inflammatory responses.
156729	Tlr4	10090	25448706	Myd88 and Ticam1 pathways differently regulate Tlr4-induced immune responses in B cells.
156729	Tlr4	10090	25483963	Autophagy causes PELI3 degradation during Tlr4-signalling, subsequently inhibiting Il1b expression and impairing the hyperinflammatory phase during sepsis.
156729	Tlr4	10090	25549946	Tmem126a upregulates genes involved in antigen presentation; such as Icam1, MHC II, Cd86 and Cd40, via the Tlr4 signal transduction pathway.
156729	Tlr4	10090	25548220	Ticam1 but not Myd88 signalling is critical for the Trl4 protective adjuvant effect in neonates; where Ticam1(-/-) but not Myd88(-/-) neonates are highly susceptible to Escherichia coli peritonitis and bacteremia.
156729	Tlr4	10090	25736436	Wdfy1 is a crucial adaptor protein in the Tlr3/4 signalling pathway. Wdfy1 interacts with Tlr3 and Tlr4 and mediates the recruitment of Ticam1 to these receptors.
156729	Tlr4	10090	25801433	Lipopolysaccharide-mediated myeloid Anpep (CD13) expression governs internalization of Tlr4 and negatively regulates Tlr4 signalling, thereby balancing the innate response by maintaining the inflammatory equilibrium critical to innate immune regulation.
156729	Tlr4	10090	26081153	Psen2 deficiency is paralleled by reduced transcription of Tlr4 mRNA and loss of LPS-induced Tlr4 mRNA transcription regulation.
156729	Tlr4	10090	26310831	Peli3 is involved in endotoxin tolerance and functions as a negative regulator of Tlr2/4 signalling.
130436	Peli3	10090	26310831	Peli3 is involved in endotoxin tolerance and functions as a negative regulator of Tlr2/4 signalling.
189070	Atf7	10090	26322480	Atf7, a stress-response transcription factor, mediates epigenetic changes in macrophages involved in innate immunological memory in response to lipopolysaccharide.
127311	MIR223	9606	22984082	MIR223 negatively regulates NLRP3 inflammasome activity.
127311	MIR223	9606	22984081	MIR223 regulates the NLRP3 inflammasome and IL-1Î² production.
127311	MIR223	9606	26296289	MIR223 regulates macrophage function by modulating cytokine production and NF-ÎºB activation through inhibition of RELA phosphorylation and nuclear translocation.
285	COLEC12	9606	26290605	Soluble COLEC12 can recognize Aspergillus fumigatus leading to activation of the alternative pathway of complement.
47294	TLR3	9606	19074283	TLR3-type II IFN signalling cooperates with the RIG-I/MDA5-type I IFN axes for efficient innate antiviral immune responses.
47294	TLR3	9606	19865078	TLR3-dependent antiviral pathway is negatively regulated by activated F2RL1 leading to blunted expression of TLR3/IRF3 driven genes, as well as activation of IRF3 and STAT1.
47294	TLR3	9606	19865078	TLR3, TLR2, or TLR4 cooperate with proteinase-activated receptors (PARs) for activation of nuclear factor-kappaB-dependent signalling in mucosal epithelial cell lines.
47294	TLR3	9606	20019748	TLR3-induced proapoptotic signalling involves TICAM1 (TRIF)-dependent activation of CASP8 and is under the control of inhibitor of apoptosis proteins (IAPs) in melanoma cells.
47294	TLR3	9606	11607032	TLR3 is activated by poly(I:C) and this induces cytokine production through a signalling pathway dependent on MyD88.
47294	TLR3	9606	14982987	TLR3-mediated activation of NF-kappaB and IRF3 diverges at Toll-IL-1 receptor domain-containing adapter 1 (TICAM1) inducing IFN-beta.
47294	TLR3	9606	20861016	TLR3 dimerizes when it binds dsRNA and this is essential for ligand binding. Although the three TLR3 contact sites individually interact weakly with their binding partners, together they form a high affinity ligand-receptor complex.
47294	TLR3	9606	21220319	TLR3 deletion dramatically enhanced the development of elastic lamina damage after collar-induced injury, indicating that TLR3 signalling plays a protective role in arterial vessel wall.
47294	TLR3	9606	21367858	TLR3 activation by Poly(I:C) in the endothelial cells induces Poly(I:C) dose- and time-dependent cell apoptosis. Specifically, TLR3 stimulation triggered the signalling of both extrinsic and intrinsic apoptotic pathways.
47294	TLR3	9606	21402738	TLR3 requires proteolytic processing in endolysosome by asparagine endopeptidase and cathepsin in the endolysosome to initiate signalling in response to DNA. (Demonstrated in murine model)
47294	TLR3	9606	21498625	TLR3 expression is inducible by LPS via TLR4-MYD88-IRAK-TRAF6-NFKB dependent signalling pathway.
47294	TLR3	9606	21695051	TLR3 is necessary to establish an antiviral state in hepatocytes infected with hepatitis C Virus. HCV envelope proteins counteract the antiviral host defence by inhibiting the expression of TLR3.
47294	TLR3	9606	22016778	TLR3 signalling is enhanced by the presence of viral double-strand RNA-binding proteins.
47294	TLR3	9606	22072781	TLR3-TICAM1-mediated signalling pathway plays an essential role in the anti-viral response against poliovirus infection. (Demonstrated in mice)
47294	TLR3	9606	22262694	TLR3 is constitutively expressed in spermatogonia and spermatocytes, and has the ability to activate anti-viral responses. (Demonstrated in mice)
47294	TLR3	9606	22421964	Upon engagement with its ligand, dsRNA, TLR3 possesses the ability to recruit CASP8 and RIPK1 to induce apoptosis.
47294	TLR3	9606	22754655	Activation of TLR3 with poly(I:C) mediates antiviral immunity that diminishes coronavirus production in macrophages. (Demonstrated in mice)
47294	TLR3	9606	22570612	Upregulation of TLR3 in intestinal epithelia during infancy may contribute to age-dependent susceptibility to rotavirus infection. (Demonstrated in mice)
47294	TLR3	9606	22986631	TLR3 activation differentially regulates phagocytosis of bacteria and apoptotic neutrophils by peritoneal macrophages. (Demonstrated in mice)
47294	TLR3	9606	23035017	TLR3 is more efficiently activated by high molecular mass than by low molecular weight poly(I:C).
47294	TLR3	9606	25452586	TLR3-mediated antibody response to Chikungunya virus plays a key role in its infection, replication and pathology.
47294	TLR3	9606	25641411	Intracellular/endocytic TLR3 interacts with SCARF 1 in the presence of Poly I:C to boost TLR3-mediated inflammatory signalling and stimulate cytokine production in macrophages.
47294	TLR3	9606	25880109	Signalling through both DDX58 and TLR3 is important for interferon induction by influenza A virus in alveolar epithelial cells.
47294	TLR3	9606	26296370	Bluetongue virus activates TLR3/interferons signalling pathway resulting in the inhibition of human immunodeficiency virus in macrophages.
17212	CLEC4E	9606	21267996	CLEC4E, a C-type lectin receptor, is a pattern recognition receptor critical for immune responses to fungi. CLEC4E is coupled to SYK kinase and signals via CARD9 to activate NFKB, which in turns induces both innate and adaptive immunity.
17212	CLEC4E	9606	24733387	Glycerol monomycolate is a unique ligand for CLEC4E (Mincle).
17212	CLEC4E	9606	26296894	Cholesterol crystals are an endogenous ligand for CLEC4E and their binding activates innate immune responses.
193222	Traf6	10090	21185369	Traf6 is a E3 ubiquitin ligase that activates NFKB pathway in response to innate and adaptive immunity stimuli. Traf6 protein contains a highly conserved TRAF-C domain that contributes to oligomerization and its interaction to upstream signalling molecules, and a RING domain dimerization interface that is functionally important for ubiquitination and the activation of NFKB.
193222	Traf6	10090	21220427	Traf6 is polyubiquitinated and disassembled during endotoxin tolerization; a process which impairs the production of LPS-induced pro-inflammatory cytokines without inhibition expression of anti-inflammatory or anti-microbial mediators.
193222	Traf6	10090	22033459	Traf6 is degraded in the proteasome upon TLR stimulation in macrophages.
193222	Traf6	10090	23951545	The binding of MAVS to Traf2, Traf5, and Traf6 is dependent on virus infection and MAVS polymerization. The TRAF proteins promote ubiquitination that recruits IKBKG binding to the MAVS signalling complex.
193222	Traf6	10090	26048146	Mir146 attenuates sepsis-induced cardiac dysfunction by preventing NFÎºB activation, inflammatory cell infiltration, and inflammatory cytokine production via targeting of Irak1 and Traf6 in both cardiomyocytes and inflammatory monocytic cells
193222	Traf6	10090	25808990	Intracellular Sef/IL-17R (SEFIR) domain of Il17rd targets TIR adaptor proteins Myd88, Tirap, Ticam1, Ticam2 and Traf6 to inhibit TLR downstream signalling.
193222	Traf6	10090	26503954	Trim12c interacts with Traf6, a key protein in pathogen recognition receptor signalling, and reciprocally enhances its ubiquitination, leading to cooperative activation of IFN and NF-kB pathways.
193222	Traf6	10090	26305951	Usp25 physically associates with Traf3 and Traf6 after infection by RNA or DNA viruses and promotes innate antiviral responses by protecting virus-induced proteasome-dependent or independent degradation of Traf3 and Traf6.
172558	Traf3	10090	16306937	Traf3 is a component of Toll/interleukin-1 receptor (TIR) signalling complexes that is recruited along with Traf6. Traf3 is essential for the induction of type I interferons (IFN) and the anti-inflammatory cytokine interleukin 10, but is dispensable for expression of pro-inflammatory cytokines.
172558	Traf3	10090	21660053	Traf3 is a highly versatile regulator that positively controls type I interferon production, and negatively regulates MAP kinase activation and alternative NFkB signalling.
172558	Traf3	10090	22792062	Upon sensing dsRNA or dsDNA, Traf3 interacts with ER-to-Golgi transport proteins to induce Mavs-associated innate immune responses. (Demonstrated in human)
172558	Traf3	10090	25422508	Traf3 expressed in myeloid cells regulates immune responses in myeloid cells and acts to inhibit inflammation and tumor development.
172558	Traf3	10090	26305951	Usp25 physically associates with Traf3 and Traf6 after infection by RNA or DNA viruses and promotes innate antiviral responses by protecting virus-induced proteasome-dependent or independent degradation of Traf3 and Traf6.
171582	Usp25	10090	26305951	Usp25 physically associates with Traf3 and Traf6 after infection by RNA or DNA viruses and promotes innate antiviral responses by protecting virus-induced proteasome-dependent or independent degradation of Traf3 and Traf6.
172251	Irf1	10090	21097874	Irf1 transcriptionally inhibits the Il23a through the ISRE element and reduce the severity of chronic intestinal inflammation caused by LPS.
172251	Irf1	10090	22266972	Irf1 promotes immune cell apoptosis and inhibits autophagy in a murine endotoxemia model.
172251	Irf1	10090	24675692	Irf1 is an essential regulator of the host innate antiviral response in the brain by limiting viral replication at later stages of infection, but is not involved in the rapid induction of IFN.
172251	Irf1	10090	26305961	Nlrp3 deficiency protects mice from the development of type 1 diabetes by suppressing Th1 responses and impairing T-cell migration to pancreatic islets through the down-regulation of chemokine expression (Ccl5, Cxcl10, Irf1) in islets.
179916	Cxcl10	10090	21124994	Cxcl10 exert direct antimicrobial effects in vitro against Bacillus anthracis spore and bacilli in a receptor-independent manner and contributes to pulmonary innate immunity.
179916	Cxcl10	10090	21518789	Cxcl10 concentration in blood increases during neonatal polymicrobial sepsis, and the blockade of Cxcl10 not only worsens recruitment and phagocytic function of macrophages, but also the survival of neonatal mice.
179916	Cxcl10	10090	26305961	Nlrp3 deficiency protects mice from the development of type 1 diabetes by suppressing Th1 responses and impairing T-cell migration to pancreatic islets through the down-regulation of chemokine expression (Ccl5, Cxcl10, Irf1) in islets.
205509	Ccl5	10090	26305961	Nlrp3 deficiency protects mice from the development of type 1 diabetes by suppressing Th1 responses and impairing T-cell migration to pancreatic islets through the down-regulation of chemokine expression (Ccl5, Cxcl10, Irf1) in islets.
68302	ITGB1	9606	20877569	ITGB1 along with ITGA3 is a novel regulator for the recognition of bacterial lipopeptides. ITGB1/ITGA3 integrin regulates endosomal Toll-like receptor (TLR)-2/TLR1 signalling, serving as a mechanism for modulating inflammatory responses.
68302	ITGB1	9606	26288256	IFNG primes mast cells for enhanced anti-bacterial and pro-inflammatory responses to Staphylococcus aureus, partially mediated by ITGB1.
45916	IFNG	9606	20157607	The combined treatment of IFNG with 1,25-dihydroxyvitamin D3 (1,25-D3) synergistically enhances nitric oxide (NO) synthesis and NOS2 expression induced by Mycobacterium tuberculosis (MTB) or by its purified protein derivatives in human monocyte-derived macrophages.
45916	IFNG	9606	20381453	IFNG mediates DUOX2 dual oxidase expression via a STAT-independent signalling pathway and providing insights into a novel IFNG signalling pathway with potential importance for regulation of host defence responses.
45916	IFNG	9606	17981204	IFNG is crucial for immunity against intracellular pathogens and for tumour control and it is produced predominantly by natural killer (NK) and natural killer T (NKT) cells as part of the innate immune response.
45916	IFNG	9606	24012417	IFN gamma creates a primed chromatin environment in macrophages to augment TLR-induced gene transcription.
45916	IFNG	9606	25474109	IFNG interferes with the IL-1/NFKBIZ axis in Î²-glucan-activated dendritic cells and promotes T cell-mediated immune responses with increased release of IFNG and IL22, and diminished production of IL17A.
45916	IFNG	9606	25732728	Primary Î³Î´ T cells provide an early source of IFNG during dengue virus (DV) infection and target DV-infected cells. Monocytes also participate as accessory cells that sense DV infection and amplify the cellular immune response in an IL18-dependent manner.
45916	IFNG	9606	25637949	DEFB103A and RNASE7 are induced in human umbilical endothelial cells (HUVECs) by classical inflammatory cytokines such as: IFNG, IL1B and TNF.
45916	IFNG	9606	26288256	IFNG primes mast cells for enhanced anti-bacterial and pro-inflammatory responses to Staphylococcus aureus, partially mediated by ITGB1.
43931	DDX60L	9606	26269178	DDX60L is an important effector protein of the innate immune response against hepatitis C virus.
95591	HDAC2	9606	20798038	Histone deacetylase 2 (HDAC2) is part of a repressor complex, along with key components that include HDAC1, RE-1 silencing transcription factor (REST), co-repressor of REST (CoREST), and lysine-specific demethylase (LSD) 1. The HDAC/CoREST/REST/LSD1 repressor complex is a significant component of host innate immunity.
95591	HDAC2	9606	26287468	TET2 selectively mediates active repression of IL6 transcription via NFKBIZ and HDAC2 during inflammation resolution in innate myeloid cells, including dendritic cells and macrophages.
48252	NFKBIZ	9606	16513645	Inhibits the DNA binding of RELA and NFKB1
48252	NFKBIZ	9606	19783680	A key regulator of IL-6 production in human monocytes and plays an important role in both TLR and NOD-like receptor ligand induced inflammation
48252	NFKBIZ	9606	25474109	IFNG interferes with the IL-1/NFKBIZ axis in Î²-glucan-activated dendritic cells and promotes T cell-mediated immune responses with increased release of IFNG and IL22, and diminished production of IL17A.
48252	NFKBIZ	9606	26287468	TET2 selectively mediates active repression of IL6 transcription via NFKBIZ and HDAC2 during inflammation resolution in innate myeloid cells, including dendritic cells and macrophages.
9462	IL6	9606	21148800	IL6 trans-signalling via STAT3 is a critical modulator of LPS-driven pro-inflammatory responses through cross-talk regulation of the TLR4/Mal signalling pathway broader mechanism that regulates the severity of the host inflammatory response.
9462	IL6	9606	22096605	IL6 synthesis is regulated by the opposing effects of prostaglandin (PG)E(2) and PGD(2) in human chondrocytes. IL6 synthesis is increased by PGE2 and decreased by PGD2 through the modulation of TLR4 synthesis.
9462	IL6	9606	22030478	Activation of either TLR4 or TLR2/6 significantly increased IL6 expression by U937 mononuclear cells. Co-activation of TLR4 and TLR2/6, led to a further augmentation on IL-6 expression.
9462	IL6	9606	22426116	IL6 is strategically upregulated by virulent Mycobacterium tuberculosis to inhibit the induction of innate immunity.
9462	IL6	9606	23735697	Hyperglycemia abrogates the ability of IL6 to induce neutrophil extracellular traps.
9462	IL6	9606	24012417	IFN gamma creates a primed chromatin environment in macrophages to augment TLR-induced IL6 transcription
9462	IL6	9606	26287468	TET2 selectively mediates active repression of IL6 transcription via NFKBIZ and HDAC2 during inflammation resolution in innate myeloid cells, including dendritic cells and macrophages.
32690	TET2	9606	26287468	TET2 selectively mediates active repression of IL6 transcription via NFKBIZ and HDAC2 during inflammation resolution in innate myeloid cells, including dendritic cells and macrophages.
143980	Hdac2	10090	26287468	Tet2 selectively mediates active repression of Il6 transcription via Nfkbiz and Hdac2 during inflammation resolution in innate myeloid cells, including dendritic cells and macrophages.
165943	Nfkbiz	10090	26287468	Tet2 selectively mediates active repression of Il6 transcription via Nfkbiz and Hdac2 during inflammation resolution in innate myeloid cells, including dendritic cells and macrophages.
144970	Il6	10090	21148800	Il6 trans-signaling via Stat3 is a critical modulator of LPS-driven pro-inflammatory responses through cross-talk regulation of the Tlr4/Mal signaling pathway as a broader mechanism that regulates the severity of the host inflammatory response.
144970	Il6	10090	22096605	Il6 synthesis is regulated by the opposing effects of prostaglandin (PG)E(2) and PGD(2) in human chondrocytes. Il6 synthesis is increased by PGE2 and decreased by PGD2 through the modulation of Tlr4 synthesis. (Demonstrated in human)
144970	Il6	10090	22030478	Activation of either Tlr4 or Tlr2/6 significantly increased Il6 expression by U937 mononuclear cells. Co-activation of Tlr4 and Tlr2/6, led to a further augmentation on Il6 expression. (Demonstrated in human)
144970	Il6	10090	22426116	Il6 is strategically upregulated by virulent Mycobacterium tuberculosis to inhibit the induction of innate immunity. (Demonstrated in human)
144970	Il6	10090	23359591	Mycobacterium tuberculosis regulates host IL6 production to inhibit type I interferon-signalling.
144970	Il6	10090	24412616	Il6 causes compromised tissue repair by shifting acute inflammation into a more chronic profibrotic state through induction of T helper type1 cell responses as a consequence of recurrent inflammation.
144970	Il6	10090	25398005	Ybx1 controls intracellular Il6 mRNA levels in a cell type-specific manner, leading to functions that are dependent on the extracellular and intracellular distribution of Ybx1.
144970	Il6	10090	25725105	Cfp plays a role in intestinal homeostasis in response to an infectious challenge to activate Hc (C5a), which in turn provides protection through Il6 expression by the epithelium.
144970	Il6	10090	25595775	Defb1 is important for the control of early mucosal Candida infection and plays a critical role in the induction of innate inflammatory mediators including, Il1b, Il6, Cxcl1, Il17a, and Il17f.
144970	Il6	10090	26287468	Tet2 selectively mediates active repression of Il6 transcription via Nfkbiz and Hdac2 during inflammation resolution in innate myeloid cells, including dendritic cells and macrophages.
195027	Tet2	10090	26287468	Tet2 selectively mediates active repression of Il6 transcription via Nfkbiz and Hdac2 during inflammation resolution in innate myeloid cells, including dendritic cells and macrophages.
161368	March5	10090	21625535	March5 is a mitochondrial ubiquitin ligase that positively regulates Tlr7 signalling. March5 interacts with Tank to induce NFkB-mediated gene expression.
161368	March5	10090	26246171	March5 modulates Mavs-mediated antiviral signalling, preventing excessive immune reactions.
82450	MARCH5	9606	21625535	MARCH5 is a mitochondrial ubiquitin ligase that positively regulates TLR7 signalling. MARCH5 interacts with TANK to induce NFkB-mediated gene expression.
82450	MARCH5	9606	26246171	MARCH5 modulates MAVS-mediated antiviral signalling, preventing excessive immune reactions.
175760	Bnip3l	10090	26253785	Mitophagy-inducing proteins Bnip3 and Bnip3l play a regulatory role in the generation of robust natural killer cell memory.
269444	Bnip3	10090	26253785	Mitophagy-inducing proteins Bnip3 and Bnip3l play a regulatory role in the generation of robust natural killer cell memory.
137564	Isg15	10090	22022264	Isg15 expression is induced during a hepatitis C virus infection in an Irf3-dependent manner. Isg15 acts as a negative modulator of the RIG-I pathway by mediating the level of Ddx58 (RIG-I) ubiquitination. (Demonstrated in human)
137564	Isg15	10090	26259872	Isg15 protects against Listeria monocytogenes infection.
84312	ISG15	9606	19043203	ISG15 (ISGylation) post-translational modification is mediated by a sequential reaction similar to ubiquitination and has been shown to negatively regulate the NF-kappaB pathway.
84312	ISG15	9606	22022264	ISG15 expression is induced during a hepatitis C virus infection in an IRF3-dependent manner. ISG15 acts as a negative modulator of the RIG-I pathway by mediating the level of DDX58 (RIG-I) ubiquitination.
84312	ISG15	9606	24448099	ISG15 does not directly alter human rhinovirus replication but modulates immune signalling via the viral sensor protein DDX58 to impact production of CXCL10, which has been linked to innate immunity to viruses.
84312	ISG15	9606	24448099	Human rhinovirus infection of epithelial cells induces the expression and secretion of ISG15, which modulates immune responses via effects on DDX58, and by regulating CXCL10 production.
84312	ISG15	9606	26259872	ISG15 protects against Listeria monocytogenes infection.
159848	Cdkn1a	10090	26259914	During sepsis-induced generation of myeloid-derived suppressor cells, transcription factor Nfia represses Cdkn1a to arrest differentiation of Gr1+ CD11b+ cells.
164923	Nfia	10090	26259914	During sepsis-induced generation of myeloid-derived suppressor cells, transcription factor Nfia represses Cdkn1a to arrest differentiation of Gr1+ CD11b+ cells.
53485	IFNB1	9606	20174559	IFNB1 has an essential role in the anti-viral response and optineurin (OPTN) has a role in the inhibition of virus-triggered IFNB1 induction.
53485	IFNB1	9606	20501842	Viral RNA-induced IFNB1 production is suppressed by oncogenic RAS through negative regulation of RIG-I signalling, leading to promotion of virus spread.
53485	IFNB1	9606	20699220	IFNB1 expression is inhibited by influenza A virus polymerase by binding to IFN-beta promoter stimulator 1 (MAVS).
53485	IFNB1	9606	20298124	IFNB1 is a type I interferon (IFN-I) and the IFN-I family comprises a wide number of cytokines with different modulatory effects on angiogenesis, cell growth, fibrosis, apoptosis and autoimmunity.
53485	IFNB1	9606	21408089	IFNB1 deficiency results in a partial suppression of the sterol pathway in macrophages during viral infections, thereby linking the regulation of lipid metabolism pathway with interferon anti-viral defence responses. (Demonstrated in murine model)
53485	IFNB1	9606	21602824	IFNB1 secretion is greater upon viable E. coli infection in comparison to heat killed E. coli vaccine or LPS. The induction of IFNB1 is dependent on TICAM1-IRF3 signalling. (Demonstrated in murine model).
53485	IFNB1	9606	22291574	IFNB1 expression pattern during viral infection is a highly stochastic process influenced by cell-to-cell variability in viral induction processes. (Demonstrated in mice)
53485	IFNB1	9606	22912878	IFNB1 production is fundamental to the efficient control of Listeria monocytogenes during the early innate phase of infection. NK cells treated with IFNB1 during early infection were able to reduce bacterial titer in the spleen and significantly improve survival of infected mice. (Demonstrated in mouse)
53485	IFNB1	9606	25463536	Macrocyclic NS3-4A resistance-associated amino acid variants (RAVs) with substitutions at residue D168 of the hepatitis C virus protease result in an increased capacity of NS3-4A to cleave MAVS and suppress IFNB1 induction.
53485	IFNB1	9606	25505178	Coronavirus engages papain-like proteases to escape from the innate antiviral response of the host by inhibiting TP53-IRF7-IFNB1 signalling.
53485	IFNB1	9606	25505063	Hepatitis B virus (HBV) polymerase inhibits TMEM173-stimulated IRF3 activation and IFNB1 induction.
53485	IFNB1	9606	25678110	ELAVL1 is required for the stabilization of IFNB1 mRNA, and suppression of ELAVL1 leads to impaired expression of IFNB1 in response to poly(I:C) treatment.
53485	IFNB1	9606	26202980	IFNB1 selectively restricts the transcriptional responses mediated by both the TLRs and the NOD-like receptors in Salmonella enterica serovar Typhimurium infection in macrophages.
70010	JMJD6	9606	26221041	Reversible arginine methylation of TRAF6 is regulated by PRMT1 and JMJD6 and this in turn regulates TRAF6-dependent TLR signalling.
63299	PRMT1	9606	19136629	PRMT1 is a protein arginine methyltransferase and a novel and crucial negative regulator of STAT1 activation that controls PIAS1-mediated repression by arginine methylation.
63299	PRMT1	9606	26221041	Reversible arginine methylation of TRAF6 is regulated by PRMT1 and JMJD6 and this in turn regulates TRAF6-dependent TLR signalling.
102434	RORC	9606	26187413	Differentiation of Type 3 innate lymphoid cells (ILC3) to IL7R(+) ILC1 is reversible whereas IL7R(+) ILC1 can differentiate to ILC3 in the presence of IL2, IL23A, and IL1B dependent on the transcription factor RORC, and this process is enhanced in the presence of retinoic acid.
40891	IL23A	9606	20405269	IL23A expression is regulated by MAP3K8 in lipopolysaccharide (LPS)-stimulated macrophages through ERK activation.
40891	IL23A	9606	20404142	IL23A suppresses innate immune response independently of IL17A during carcinogenesis and metastasis (shown in mice).
40891	IL23A	9606	21097874	IL23A is a LPS induced gene, and its expression in macrophages correlate with the severity of chronic intestinal inflammation. IL23A is transcriptionally inhibited by the binding of IRF1 to the ISRE element and serve as a homeostatic checkpoint in chronic intestinal inflammation (shown in mice).
40891	IL23A	9606	26187413	Differentiation of Type 3 innate lymphoid cells (ILC3) to IL7R(+) ILC1 is reversible whereas IL7R(+) ILC1 can differentiate to ILC3 in the presence of IL2, IL23A, and IL1B dependent on the transcription factor RORC, and this process is enhanced in the presence of retinoic acid.
36892	IL2	9606	26187413	Differentiation of Type 3 innate lymphoid cells (ILC3) to IL7R(+) ILC1 is reversible whereas IL7R(+) ILC1 can differentiate to ILC3 in the presence of IL2, IL23A, and IL1B dependent on the transcription factor RORC, and this process is enhanced in the presence of retinoic acid.
16161	IL7R	9606	26187413	Differentiation of Type 3 innate lymphoid cells (ILC3) to IL7R(+) ILC1 is reversible whereas IL7R(+) ILC1 can differentiate to ILC3 in the presence of IL2, IL23A, and IL1B dependent on the transcription factor RORC, and this process is enhanced in the presence of retinoic acid.
160059	Lcn2	10090	26190773	Macrophage iron regulatory proteins Aco1 and Ireb2 are protective against Salmonella by promoting the induction of Lcn2, a host antimicrobial factor that inhibits bacterial uptake of iron-laden siderophores, and by suppressing the ferritin iron pool.
167179	Ireb2	10090	26190773	Macrophage iron regulatory proteins Aco1 and Ireb2 are protective against Salmonella by promoting the induction of Lcn2, a host antimicrobial factor that inhibits bacterial uptake of iron-laden siderophores, and by suppressing the ferritin iron pool.
135868	Aco1	10090	26190773	Macrophage iron regulatory proteins Aco1 and Ireb2 are protective against Salmonella by promoting the induction of Lcn2, a host antimicrobial factor that inhibits bacterial uptake of iron-laden siderophores, and by suppressing the ferritin iron pool.
47893	TMEM173	9606	18724357	TMEM173 (STING) is an endoplasmic reticulum (ER) receptor that facilitates interferon (IFN) induction by binding to DDX58 (RIG-I) and to subunits of TRAP complex that facilitates translocation of proteins into the ER following translation.
47893	TMEM173	9606	18818105	TMEM173 is a critical mediator of virus-triggered type I IFN signalling and a critical mediator of virus-triggered IRF3 activation.
47893	TMEM173	9606	19776740	TMEM173 is essential for host defence against DNA pathogens such as HSV-1 and facilitates the adjuvant activity of DNA-based vaccines.
47893	TMEM173	9606	19285439	TMEM173 is an adaptor protein that links virus-sensing receptors to IRF3 activation. RNF5 negatively regulates this virus-triggered signaling by targeting TMEM173 for ubiquitination and degradation at the mitochondria.
47893	TMEM173	9606	19926846	TMEM173 is required for double stranded DNA-triggered innate immune responses where, upon sensing dsDNA, TMEM173 moves from the endoplasmic reticulum (ER) to the Golgi apparatus and finally reaches the cytoplasmic punctate structures to assemble with TANK-binding kinase 1 (TBK1).
47893	TMEM173	9606	21820332	TMEM173 is involved in the innate immune recognition of Plasmodium falciparum AT-rich DNA and in the subsequent induction of type I IFNs. (Demonstrated in mouse)
47893	TMEM173	9606	22000020	TMEM173 activates STAT6 during viral infection to induce genes responsible for immune cell homing. (Demonstrated in mice)
47893	TMEM173	9606	22761576	TMEM173 is cleaved by dengue viral protease to suppress IRF3 activation and subvert antiviral immunity.
47893	TMEM173	9606	23055924	Dengue viral NS2B3 protease complex selectively targets TMEM173 (STING) for degradation to inhibit type I IFN production in human dendritic cells.
47893	TMEM173	9606	23542348	TMEM173 (STING) is targeted by hepatitis C viral protease to disrupt interferon signalling.
47893	TMEM173	9606	24131791	Cyclic-di-GMP-induced levels of IFI16 suppress the expression of TMEM173 (STING).
47893	TMEM173	9606	24449861	In herpes simplex virus 1 (HSV-1) infected cells, the stability and function of IFI16 and TMEM173 are dependent on cell derivation and the functional integrity of HSV-1 proteins ICP0 and US3 protein kinase.
47893	TMEM173	9606	24185615	After viral infection, ELF4 binds to TMEM173 (STING) and induces type I interferon. ELF4 is critical for host antiviral defense.
47893	TMEM173	9606	24449861	The end result of the interplay between TMEM173 (STING), IFI16, and herpes simplex virus 1 (HSV-1) is determined by the genotype of the infected cells and the functional integrity of HSV-1 proteins infected cell protein 0 (ICP0) and US3 protein kinase.
47893	TMEM173	9606	25401470	Familial TMEM173 mutation is associated with inflammatory lupus-like manifestations.
47893	TMEM173	9606	25425575	Cytosolic RNA:DNA hybrids are sensed by the MB21D1-TMEM173 (cGAS-STING) pathway of the innate immune system.
47893	TMEM173	9606	25505063	Hepatitis B virus (HBV) polymerase inhibits TMEM173-stimulated IRF3 activation and IFNB1 induction.
47893	TMEM173	9606	25526307	Upon cytoplasmic DNA stimulation, the endoplasmic reticulum protein AMFR is recruited to and interacts with TMEM173 in an INSIG1-dependent manner.
47893	TMEM173	9606	25792739	Stimulation of TMEM173-dependent IRF3 activation by ultraviolet radiation is due to apoptotic signalling-dependent disruption of ULK1, a pro-autophagic protein that negatively regulates TMEM173.
47893	TMEM173	9606	26646986	4-(2-chloro-6-fluorobenzyl)-N-(furan-2-ylmethyl)-3-oxo-3,4-dihydro-2H-benzo[b][1,4]thiazine-6-carboxamide (G10) requires STING to trigger IRF3/IFN-associated transcription in human fibroblasts and subsequently blocking replication of Chikungunya virus, Venezuelan Encephalitis virus, and Sindbis virus.
47893	TMEM173	9606	26199418	Viral interferon regulatory factor 1 (vIRF1), targets TMEM173 by preventing it from interacting with TBK1, thereby inhibiting TMEM173's phosphorylation and concomitant activation, resulting in an inhibition of the DNA sensing pathway.
44993	TBK1	9606	18977754	TBK1 alternative splicing negatively regulates virus-triggered IFN-beta signalling pathway by disrupting DDX58 and MAVS, and inhibiting IFN-beta signalling pathways.
44993	TBK1	9606	16286919	TBK1 and IKBKE (IKKi) kinases are required for innate immune activation by B-DNA, which may be important in antiviral innate immunity and other DNA-associated immune disorders.
44993	TBK1	9606	12692549	TBK1 and IKBKE have a pivotal role in coordinating the activation of IRF3 and NF-kappaB in the innate immune response.
44993	TBK1	9606	21820332	TBK1 is involved in the innate immune recognition of Plasmodium falciparum AT-rich DNA and in the subsequent induction of type I IFNs. Mice lacking Tbk1 are resistant to otherwise lethal cerebral malaria. (Demonstrated in mouse)
44993	TBK1	9606	22921120	TBK1 is a key regulator of immunological autophagy and is responsible for autophagosome maturation into bactericidal organelles. (Demonstrated in mouse)
44993	TBK1	9606	23986588	Herpes simplex virus 1 protein, UL36 ubiquitin-specific protease (UL36USP), deubiquitinates TRAF3 and inhibits recruitment of TBK1 and counteracts the IFNB pathway
44993	TBK1	9606	25070846	USP2 deubiquitinates K63-linked polyubiquitin chains from TBK1 to terminate TBK1 activation and negatively regulate IFNB1 signalling and antiviral immune response.
44993	TBK1	9606	26082489	Endotoxin tolerance re-programs TLR4 signalling via suppression of PELI1, a positive regulator of MyD88- and TIR domain-containing adapter inducing IFN-Î² (TRIF)-dependent signalling that promotes K63-linked polyubiquitination of IRAK1, TBK1, and TAK1.
44993	TBK1	9606	25855743	HIV-1 accessory proteins Vpr and Vif bind to TBK1, inhibit its autophosphorylation, and prevent induction of type I and III interferon in myeloid cells.
44993	TBK1	9606	26199418	Viral interferon regulatory factor 1 (vIRF1), targets TMEM173 by preventing it from interacting with TBK1, thereby inhibiting TMEM173's phosphorylation and concomitant activation, resulting in an inhibition of the DNA sensing pathway.
171519	Nrip1	10090	22388040	NF-ÎºB-mediated degradation of the coactivator NRIP1 (RIP140) regulates inflammatory responses and contributes to endotoxin tolerance.
171519	Nrip1	10090	22388040	Nrip1 is degraded by the NF-kB pathway to inactivate inflammatory gene expression and promotes endotoxin tolerance.
171519	Nrip1	10090	26228026	Nrip1 plays dual roles in regulating the M1-M2 phenotype switch in macrophages: in the nucleus as an M1 enhancer and in the cytosol as an M2 suppressor.
170175	Bcl11b	10090	25964371	Bcl11b, a transcription factor essential in T cell lineage commitment and maintenance, is specifically expressed in progenitors committed to the group 2 innate lymphoid cells (ILC2) lineage and is required for ILC2 development.
170175	Bcl11b	10090	25964370	Bcl11b is a factor in the differentiation of group 2 innate lymphoid cells (ILC2s).
170175	Bcl11b	10090	26231117	Bcl11b sustains the genetic and functional programs, as well as lineage fidelity, of mature type 2 innate lymphoid cells.
127807	Map3k8	10090	21135874	Map3k8 is a MEK kinase that is require for the activation of MAP kinases in myeloid cells following TLR and TNF receptor stimulation. Map3k8 is critical for production of the pro-inflammatory cytokine TNF during inflammatory responses.
127807	Map3k8	10090	26241898	Map3k8 plays a role in facilitating both innate and adaptive antiviral responses by transducing Type I interferon (IFN) signals and promoting expression of IFN-stimulated genes (ISGs).
151194	Egfr	10090	26243875	Il33-dependent group 2 innate lymphoid cells (ILC2s) signal via Areg-Egfr in damaged epithelia to restore epithelial barrier function and maintain tissue homeostasis.
179096	Areg	10090	26243875	Il33-dependent group 2 innate lymphoid cells (ILC2s) signal via Areg-Egfr in damaged epithelia to restore epithelial barrier function and maintain tissue homeostasis.
157638	Il33	10090	21623379	Il33 is produced in alveolar macrophages that have been infected with Influenza A virus. The Il33-Il13 signalling axis is required for airway hyper-reactivity in asthma.
157638	Il33	10090	22119406	Innate lymphoid cells responding to Il33 mediate airway hyperreactivity independently of adaptive immunity.
157638	Il33	10090	23960191	IL33 predominantly elicits group 2 innate lymphoid cells (ILC2) responses, and IL25 simultaneously elicits phenotypically and functionally distinct ILC2 and multipotent progenitor type 2 cell populations at multiple tissue sites.
157638	Il33	10090	24631157	Chitin induces IL25, IL33, and TSLP which are required to stimulate ILC2 production of IL5 and IL13. IL5 and IL13, in turn, are required for the accumulation of eosinophils and alternatively activated macrophages that are associated with allergy.
157638	Il33	10090	25659095	Il33 prevents the development of experimental cerebral malaria by orchestrating a protective immune response via type-2 innate lymphoid cells, M2 macrophages and regulatory T cells.
157638	Il33	10090	25786179	Cigarette smoke decreases Il1rl1 expression on group 2 innate lymphoid cells while elevating Il1rl1 expression on macrophages and natural killer cells, thus altering Il33 responsiveness within the lung to infection.
157638	Il33	10090	26092469	Group 2 innate lymphoid cell (ILC2)-intrinsic Il33 signalling and Icosl expression promote regulatory T cell accumulation, whereas the inflammatory cytokine Ifng counter-regulates these effects, in part through direct effects on ILC2s.
157638	Il33	10090	26243875	Il33-dependent group 2 innate lymphoid cells (ILC2s) signal via Areg-Egfr in damaged epithelia to restore epithelial barrier function and maintain tissue homeostasis.
148496	Card9	10090	20351059	Card9 is critical for full activation of innate immunity by converging signals downstream of multiple pattern recognition receptors (PRRs) and plays a pivotal role in autonomous innate host defense against tuberculosis.
148496	Card9	10090	24379290	Card9 is largely dispensable for the innate immune response to oropharyngeal candidiasis whereas it is vital for the adaptive Th17 response.
148496	Card9	10090	26627732	Card9-mediated activation of the innate immune system exacerbates influenza pneumonia. Card9 deficiency improves mortality with reduced inflammatory cytokine/chemokines.
141021	Ikbkb	10090	21138416	Ikbkb and other IKK kinases regulate each other by an intricate network involving phosphorylation of their catalytic and regulatory (NEMO, TANK) subunits to balance their activities during innate immunity.
141021	Ikbkb	10090	26620909	The reversible ubiquitin editing of Nlrc5 determines Nlrc5â Ikbkb interaction dynamics and plays a crucial role in precisely regulating NFÎºB signalling
182231	Nlrc5	10090	26620909	The reversible ubiquitin editing of Nlrc5 determines Nlrc5â Ikbkb interaction dynamics and plays a crucial role in precisely regulating NFÎºB signalling
32729	NLRC5	9606	19414032	NLRC5 is nn NLR (nucleotide-binding domain and leucine-rich repeat containing family receptors) that is part of the family of pattern recognition receptors (PRRs) and is involved in immunity against intracellular pathogens.
32729	NLRC5	9606	20061403	NLRC5 represents a molecular switch of IFN-gamma activation sequence/IFN-specific response element signalling pathways contributing to antiviral defence mechanisms.
32729	NLRC5	9606	20434986	NLRC5 is a negative regulator that blocks two central components of the NF-kappaB and type I interferon signalling pathways and has an important role in homeostatic control of innate immunity.
32729	NLRC5	9606	21148033	NLRC5 is dispensable for cytokine induction in virus and bacterial infections under physiologic conditions. (Demonstrated in murine model)
32729	NLRC5	9606	26620909	The reversible ubiquitin editing of NLRC5 determines NLRC5â IKBKB interaction dynamics and plays a crucial role in precisely regulating NFÎºB signalling
107914	NLRP3	9606	25978411	Influenza A virus non-structural protein 1, NS1, physically interacts with endogenous NLRP3 downregulating NLRP3 inflammasome activation as well as NF-kB, leading to a reduction in the levels of inflammatory cytokines.
107914	NLRP3	9606	25816776	RNA cleavage products, catalyzed by RNASEL, bind to DHX33 to facilitate the formation of a complex with MAVS and NLRP3 during viral infection.
107914	NLRP3	9606	26610398	H. pylori infection induces the expression and activation of components of NLRP3 inflammasomes in neutrophils and this activation is independent of a functional type IV secretion system, TLR2 and TLR4.
124824	C2	9606	25381436	Staphylococcus aureus extracellular adherence protein (Eap) binds to C4B to inhibit binding of both full-length C2 and its C2b fragment, disrupting the formation of the C3 proconvertase (C4b2) and significantly diminishing the extent of S. aureus opsonophagocytosis and killing by neutrophils.
124824	C2	9606	26608922	Complement interfering protein (CIP) of group B Streptococcus (GBS) shows high affinity toward C4B and inhibits its interaction with C2, presumably preventing the formation of the C4BC2A convertase and GBS phagocytic killing in the absence of anti-GBS antibodies.
301132	C4B	9606	25381436	Staphylococcus aureus extracellular adherence protein (Eap) binds to C4B to inhibit binding of both full-length C2 and its C2b fragment, disrupting the formation of the C3 proconvertase (C4b2) and significantly diminishing the extent of S. aureus opsonophagocytosis and killing by neutrophils.
301132	C4B	9606	26608922	Complement interfering protein (CIP) of group B Streptococcus (GBS) shows high affinity toward C4B and inhibits its interaction with C2, presumably preventing the formation of the C4BC2A convertase and GBS phagocytic killing in the absence of anti-GBS antibodies.
135957	Ddx58	10090	19936053	Ddx58 (Rig-I) is responsible for the cytosolic recognition of Legionella pneumophila RNA and the subsequent induction of type I IFN response.
135957	Ddx58	10090	21690088	Ddx58 and Nod2 colocalize to cellular ruffles and cell-cell junctions to form a protein complex via the CARD domains. Ddx58 negatively regulates ligand-induced NFkB signalling mediated by Nod2, and conversely, Nod2 negatively regulates type I interferon induction by Ddx58. (Demonstrated in human)
135957	Ddx58	10090	21695051	Ddx58, through the TRAIL pathway, initiates apoptosis in hepatocytes infected with hepatitis C Virus. HCV envelope proteins counteract the antiviral host defence by inhibiting the expression of Ddx58. (Demonstrated in human)
135957	Ddx58	10090	22072774	Ddx58 (RIG-I) ubiquitination is inhibited by arterivirus and nairovirus deubiquitinating enzymes (DUBs), resulting in the inhibition of RIG-I-like receptor (RLR)-mediated innate immune signalling.
135957	Ddx58	10090	22912779	Antiviral stress granules containing Ddx58 (RIG-I) and Eif2ak2 (PKR) have a critical role in viral detection and innate immunity.
135957	Ddx58	10090	23064150	DDX58 (RIG-I) detects cytosolic Listeria monocytogenes infections by sensing secreted bacterial nucleic acids.
135957	Ddx58	10090	23553835	Ddx58 (RIG-I) is a positive regulator of NF-kB signalling via binding to Nfkb1 mRNA.
135957	Ddx58	10090	23966395	Ddx58 and Ifih1 are essential pattern recognition receptors for protection against West Nile virus infection in vivo.
135957	Ddx58	10090	24692634	Ddx58 preferentially binds to coding RNA from S. Typhimurium during infection leading to the expression of IFN beta andthis immunostimulatory activity depends on 5â² triphosphorylation of RNA.
135957	Ddx58	10090	26074083	Ddx58 is the primary pattern recognition receptor (PRR) for influenza A virus (IAV), but Ifih1 is a significant contributor to the cellular defense against IAV.
135957	Ddx58	10090	26146945	Ddx58 acts in parallel with Zbp1 in an RNA polymerase III-dependent manner to initiate glial responses to herpes simplex virus-1.
135957	Ddx58	10090	26645583	Mir485 exhibits bispecificity, targeting Ddx58 in cells with a low abundance of H5N1 virus and viral PB1 in cells with increased amounts of the H5N1 virus.
221446	Mir485	10090	26645583	Mir485 exhibits bispecificity, targeting Ddx58 in cells with a low abundance of H5N1 virus and viral PB1 in cells with increased amounts of the H5N1 virus.
127079	MIR485	9606	26645583	MIR485 exhibits bispecificity, targeting DDX58 in cells with a low abundance of H5N1 virus and viral PB1 in cells with increased amounts of the H5N1 virus.
92794	PLA2G2A	9606	26644377	IL22 induced at an early stage of L. monocytogenes infection enhances innate immunity against L. monocytogenes in the liver by stimulating hepatocytes to produce an antimicrobial molecule, PLA2G2A
46046	IL22	9606	18978771	IL22 plays a role in mucosal immunity where it helps constrain inflammation and protect mucosal sites.
46046	IL22	9606	20870448	IL22 is a member of the IL-10 cytokine family that is produced by special immune cell populations and ts primary effects on target cells include its role in innate immune defence against infections, in tumourigenesis, and in inflammatory diseases.
46046	IL22	9606	21469124	IL22 increases the TNF-alpha-dependent induction and secretion of several immune-modulatory molecules such as initial complement factors, antimicrobial peptides and chemokines in primary keratinocytes. IL22-mediated induction of innate immunity is crucial for the maintenance of epidermal integrity during infection with Candida albicans.
46046	IL22	9606	21874025	IL22 is produced by lymphoid tissue-inducer cells where it regulates the maintenance of colonic lymphoid structures during Citrobacter rodentium infection, a mechanism that bridges the lymphotoxin pathway to mucosal epithelial defense mechanisms. (Demonstrated in mice)
46046	IL22	9606	22921121	IL22 protects intestinal stem cells from inflammatory tissue damage and regulates sensitivity to graft versus host disease.
46046	IL22	9606	24412612	Stat3 mediates protection against intestinal infection by inducing innate lymphoid cell derived-Il22. (Demonstrated in mice)
46046	IL22	9606	25476703	IL22 protects against and IL22RA2 aggravates liver fibrosis and cirrhosis in chronic liver infections.
46046	IL22	9606	25474109	IFNG interferes with the IL-1/NFKBIZ axis in Î²-glucan-activated dendritic cells and promotes T cell-mediated immune responses with increased release of IFNG and IL22, and diminished production of IL17A.
46046	IL22	9606	25510212	In alveolar epithelium, IL22 upregulates DEFB4A gene expression via STAT3.
46046	IL22	9606	26644377	IL22 induced at an early stage of L. monocytogenes infection enhances innate immunity against L. monocytogenes in the liver by stimulating hepatocytes to produce an antimicrobial molecule, PLA2G2A
165137	Cd47	10090	26010544	Cd47 plays a protective role against disseminated candidiasis and alters pro-inflammatory and immunosuppressive pathways known to regulate innate and T cell immunity.
165137	Cd47	10090	27194758	Cd47 plays a role as a negative regulator in inducing protective immune responses to influenza vaccination.
16420	SKP2	9606	27194766	IFI27 restricts viral infection by recruiting an E3 ligase, SKP2, for ubiquitination and degradation of viral protein.
17962	IFI27	9606	20939681	IFI27 is a mitochondrial protein and its expression sensitizes cells to apoptotic stimuli via mitochondrial membrane destabilization.
17962	IFI27	9606	27194766	IFI27 restricts viral infection by recruiting an E3 ligase, SKP2, for ubiquitination and degradation of viral protein.
186283	Clec4n	10090	21267996	Clec4n, a C-type lectin receptor, is a pattern recognition receptor critical for immune responses to fungi. Clec4n is coupled to Syk kinase and signals via Card9 to activate NFKB, which in turns induces both innate and adaptive immunity.
186283	Clec4n	10090	21357742	Clec4n is critical for the development of house dust mite (Dermatophagoides farinae) elicited eosinophilic and neutrophilic pulmonary inflammation. Clec4n was also found to be crucial for the Th2 cytokine induction in the lungs and re-stimulated lymph nodes.
186283	Clec4n	10090	21677049	Clec4n is expressed mainly in DCs and macrophages. Clec4n recognizes alpha-mannans with its carbohydrate recognition domain and transduces signals through association with the ITAM-containing Fc receptor gamma chain, which recruits Syk and initiates the Card9/NFkB signalling cascade.
186283	Clec4n	10090	27194783	Pik3cd regulates Clec4n signalling and the generation of Th2 and Th17 immunity.
205331	Pik3cd	10090	27194783	Pik3cd regulates Clec4n signalling and the generation of Th2 and Th17 immunity.
81919	IFIT3	9606	21813773	IFIT3 triggers host antiviral responses by bridging TBK1 to MAVS, and IFIT3 plays an important role in the activation of IRF3.
81919	IFIT3	9606	27210312	Hepatitis B virus-induced MIR146A attenuates cell-intrinsic anti-viral innate immunity through targeting DDX58 and IFIT3.
774160	MIR146A	9606	25705792	MIR146A upregulation by CXCR4 antagonist AMD3100 treatment or ZBTB16 silencing, decreases CXCR4 protein expression and prevents HIV-1 infection of leukemic monocytic cell line and CD4(+) T lymphocytes.
774160	MIR146A	9606	27210312	Hepatitis B virus-induced MIR146A attenuates cell-intrinsic anti-viral innate immunity through targeting DDX58 and IFIT3.
21240	TRAF3	9606	15708970	TRAF3 serves as a negative regulator of the non-canonical NF-kappaB pathway by specifically blocking the activation of NF-kappaB via TRAF2/5.
21240	TRAF3	9606	16858409	TRAF3 is required for type I interferon production in response to intracellular double-stranded RNA. Similarly, a direct and specific interaction of the TRAF domain of TRAF3 with the TRAF-interaction motif (TIM) of MAVS is required for optimal MAVS-mediated antiviral responses.
21240	TRAF3	9606	16306936	TRAF3 is a major regulator of type I interferon (IFN) production and the innate antiviral response.
21240	TRAF3	9606	20138174	TRAF3 cooperates with ZMYND11 in the regulation of Epstein-Barr virus-derived LMP1/CTAR1-induced NF-kappaB activation.
21240	TRAF3	9606	20832341	TRAF3 functions downstream of multiple TNF receptors and receptors that induce interferon (IFN)-alpha, IFN-beta, and IFN-lambda production, including Toll-like receptor 3 (TLR3). TLR3-mediated immunity against primary infection by herpes simplex virus-1 (HSV-1) in the central nervous system is critically dependent on TRAF3.
21240	TRAF3	9606	21660053	TRAF3 is a highly versatile regulator that positively controls type I interferon production, and negatively regulates MAP kinase activation and alternative NFkB signalling.
21240	TRAF3	9606	22792062	Upon sensing dsRNA or dsDNA, TRAF3 interacts with ER-to-Golgi transport proteins to induce MAVS-associated innate immune responses.
21240	TRAF3	9606	23986588	Herpes simplex virus 1 protein, UL36 ubiquitin-specific protease (UL36USP), deubiquitinates TRAF3 and inhibits recruitment of TBK1 and counteracts the IFNB pathway
21240	TRAF3	9606	27213432	HACE1 plays an inhibitory role in virus-induced signalling by disrupting the MAVS-TRAF3 complex.
94750	HACE1	9606	27213432	HACE1 plays an inhibitory role in virus-induced signalling by disrupting the MAVS-TRAF3 complex.
131590	Casp1	10090	19362023	Casp1 is involved in key innate and healing responses to influenza A virus where Casp1(-/-) mice exhibited increased morbidity after infection with a pathogenic influenza A virus correlating with decreased neutrophil and monocyte recruitment and reduced Il1b (IL-1-beta), Il18 (IL-18), Tnf (TNF-alpha), Il6 (IL-6), Cxcl1 (KC), and Cxcl2 (MIP-2) production.
131590	Casp1	10090	19124602	Casp1 is part of the inflammasome complex, along with pathogen-specific nucleotide oligomerization and binding domain (NOD)-like receptors (NLRs) and in some cases the scaffolding protein ASC. Formation of the membrane-associated inflammasome complex in murine macrophages, results in cleavage of cytosolic Casp1 substrates and cell death.
131590	Casp1	10090	21439959	Casp1 is a component of the inflammasome and is required for inflammation in acute pancreatitis.
131590	Casp1	10090	21602824	Casp1-dependent inflammatory cell death, or pyroptosis, is only induced by viable, but not heat-killed, E. coli.
131590	Casp1	10090	22833538	Naturally occurring variants of Casp1 differ considerably in structure and the ability to activate Il1b. (Demonstrated in human)
131590	Casp1	10090	25689249	Activation of the Nlrp3 inflammasome is detrimental during leishmaniasis. Mice lacking the inflammasome components Nlrp3, Pycard, Casp1 exhibit defective Il1b and Il18 production at the infection site and are resistant to cutaneous Leishmania major infection.
131590	Casp1	10090	26056255	Type 1 regulatory (Tr1) cells suppress Il1b transcription and Casp1 activation via an IL10R âdependent mechanism
131590	Casp1	10090	27214553	Uropathogenic Escherichia coli protein TcpC attenuates activation of the Nlrp3 inflammasome by binding both Nlrp3 and Casp1.
164567	Retnla	10090	23355735	Retnla (RELMalpha) has a proinflammatory role in bacterial-induced colitis.
164567	Retnla	10090	27220602	Expression of Cxcl13, Ifngr1, Retnla and Mrc1 distinguishes between large and small resident peritoneal macrophage subsets.
135936	Ifngr1	10090	27220602	Expression of Cxcl13, Ifngr1, Retnla and Mrc1 distinguishes between large and small resident peritoneal macrophage subsets.
181227	Cxcl13	10090	27220602	Expression of Cxcl13, Ifngr1, Retnla and Mrc1 distinguishes between large and small resident peritoneal macrophage subsets.
138187	Mrc1	10090	27220602	Expression of Cxcl13, Ifngr1, Retnla and Mrc1 distinguishes between large and small resident peritoneal macrophage subsets.
4758	NFKBIA	9606	9891086	NFKBIA is a common component of the heterogeneous IKK complex that mediates an essential step of the NF-kappaB signal transduction cascade by acting as an inhibitor of NF-kappaB.
4758	NFKBIA	9606	12429743	Tyrosine phosphorylation of NFKBIA is c-Src-dependent, leading to the subsequent activation of NF-kappaB.
4758	NFKBIA	9606	16931600	Nuclear transport of the NFKBIA : RELA complex, required for the appropriate regulation of NF-kappaB signalling, is facilitated by 14-3-3 proteins.
4758	NFKBIA	9606	18503636	NFKBIA ubiquitination and degradation is inhibited by ChlaDub1, a protein of Chlamydia trachomatis, suppressing NF-kappaB activation as a result.
4758	NFKBIA	9606	21454695	NFKBIA degradation occurs through the TNF-stimulated formation of autophagosomes in epithelial cells, which results in the prolonged activation of NFKB activity.
4758	NFKBIA	9606	23487427	Polymorphisms in the NFKBIA promoter are associated with pediatric lung diseases, including childhood asthma, bronchiolitis and bronchopulmonary dysplasia.
4758	NFKBIA	9606	26642243	Haploinsufficiency of A20 (HA20) is caused by high-penetrance loss-of-function germline mutations in TNFAIP3 with increased degradation of NFKBIA, nuclear translocation of RELA, increased expression of NFÎºB mediated proinflammatory cytokines, and defective deubiquitinating activity.
97033	TNFAIP3	9606	18268035	TNFAIP3 restricts TLR signals by restricting ubiquitination of TRAF6 and restricts MyD88-independent TLR signals by inhibiting Toll/interleukin 1 receptor domain-containing adaptor inducing interferon (IFN) beta (TICAM1)-dependent nuclear factor kappaB signals but not IFN response factor 3 signalling.
97033	TNFAIP3	9606	18342009	TNFAIP3 restricts NOD2 triggered signals by deubiquitinating RIPK2.
97033	TNFAIP3	9606	16306043	TNFAIP3 negatively regulates the RIG-I antiviral state by blocking IRF- and NF-kappaB-mediated gene expression.
97033	TNFAIP3	9606	18349075	TNFAIP3 negatively regulates BCL10- and CARMA3-mediated activation of NF-kappaB by means of its deubiquitylation activity and preventing assembly of the complex containing CARMA3, BCL10 and IKBKG (NEMO).
97033	TNFAIP3	9606	15258597	TNFAIP3 removes lysine-63 linked ubiquitin chains from RIPK1 and polyubiquitinates RIPK1 with K48-linked ubiquitin chains, targeting it for proteosomal degradation, and hence down-regulating NF-kappaB signalling pathway.
97033	TNFAIP3	9606	17709380	TNFAIP3 is phosphorylated by IKBKB and this increases the ability of TNFAIP3 to inhibit the NF-kappaB signalling pathway.
97033	TNFAIP3	9606	19008218	TNFAIP3 is an early NF-kappaB-responsive gene that encodes a ubiquitin-editing protein that is involved in the negative feedback regulation of NF-kappaB signalling and thus is a central gatekeeper in inflammation and immunity.
97033	TNFAIP3	9606	20304918	TNFAIP3 (A20) and TAX1BP1 inhibit antiviral signaling by targeting TBK1/IKKi kinases and disrupting a TRAF3-TBK1-IKKi signalling complex.
97033	TNFAIP3	9606	20798608	TNFAIP3 and TRAF6 differentially regulate TLR4-induced autophagy during inflammatory responses by modulating K63-linked ubiquitination of BECN1 (Beclin 1).
97033	TNFAIP3	9606	21119682	TNFAIP3 is a deubiquitinase that counteracts E3 ligases and therefore play a prominent role in the down-regulation of NF-ÎºB signalling and homeostasis.
97033	TNFAIP3	9606	21220427	TNFAIP3 expression and TNFAIP3-IRAK1interaction are important for endotoxin tolerance. TNFAIP3 over-expression inhibits LPS-induced activation of NFKB, and is mechanistically linked to endotoxin tolerance through the reprogramming of TLR4 signalling.
97033	TNFAIP3	9606	22031828	TNFAIP3 promotes intestinal epithelial barrier integrity and inhibits LPS-induced loss of the tight junction protein occludin. (Demonstrated in mice)
97033	TNFAIP3	9606	26642243	Haploinsufficiency of A20 (HA20) is caused by high-penetrance loss-of-function germline mutations in TNFAIP3 with increased degradation of NFKBIA, nuclear translocation of RELA, increased expression of NFÎºB mediated proinflammatory cytokines, and defective deubiquitinating activity.
174129	Ifih1	10090	21245317	Ifih1 is an RNA helicase and is a key component in activating the expression of type I IFN in response to viral infection. Viral mRNA with 5' cap and 3' poly(A) from parainfluenza virus 5 is able to activate IFN expression through Rnasel-Ifih1 signalling pathway.
174129	Ifih1	10090	19936053	Ifih1 (MDA5) is responsible for the cytosolic recognition of Legionella pneumophila RNA and the subsequent induction of type I IFN response.
174129	Ifih1	10090	21637773	Ifih1 deficiency results in a delayed type I IFN and attenuated type III IFN response to rhinovirus infection, leading to a transient increase in viral titer. Upon recognition of viral dsRNA, Ifih1 synergizes with Tlr3 to induce pro-inflammatory signals leading to airways inflammation and hyper-responsiveness.
174129	Ifih1	10090	23328395	Paramyxovirus V proteins bind to IFIH1 (MDA5) to disrupt viral RNA recognition and induction of antiviral immunity.
174129	Ifih1	10090	23966395	Ddx58 and Ifih1 are essential pattern recognition receptors for protection against West Nile virus infection in vivo.
174129	Ifih1	10090	24362933	Plasmodium RNA is a pathogen-associated molecular pattern (PAMP) capable of activating a type I IFN response via the cytosolic pattern recognition receptors Ifih1 and Mavs, as well as via transcription factors Irf3 and Irf7.
174129	Ifih1	10090	25451939	Arl5b negatively regulates the antiviral innate immune response by binding to Ifih1 and prevents the subsequent interaction of Ifih1 to poly(I:C).
174129	Ifih1	10090	26074083	Ddx58 is the primary pattern recognition receptor (PRR) for influenza A virus (IAV), but Ifih1 is a significant contributor to the cellular defense against IAV.
174129	Ifih1	10090	26633895	Transgenic picornavirus RNA-dependent RNA polymerase (RdRP) expression in mice produces a quantitatively dramatic, sustained, effective antiviral interferon-stimulated genes (ISG) network, which requires the MDA5-MAVS pathway.
159374	Il2rb	10090	26668377	Selective loss of the histone-lysine N-methyltransferase Ezh2 (enhancer of zeste homolog 2) or inhibition of its enzymatic activity increases generation of the Il2rb (CD122) natural killer (NK) precursors and mature NK progeny.
143636	Ezh2	10090	26668377	Selective loss of the histone-lysine N-methyltransferase Ezh2 or inhibition of its enzymatic activity increases generation of the Il2rb (CD122) natural killer (NK) precursors and mature NK progeny.
192196	Ifng	10090	23754402	IFNG is produced by neutrophils to mount host protection against intracellular pathogens.
192196	Ifng	10090	23818011	IFNG produced by natural killer cells exacerbates Listeria monocytogenes infection by inhibiting granulocyte recruitment.
192196	Ifng	10090	26065469	Ticam2 mediates antibacterial defence during Gram-negative pneumonia by inducing Ifng at the primary site of infection.
192196	Ifng	10090	26092469	Group 2 innate lymphoid cell (ILC2)-intrinsic Il33 signalling and Icosl expression promote regulatory T cell accumulation, whereas the inflammatory cytokine Ifng counter-regulated the effects of Il33, in part through direct effects on ILC2s.
192196	Ifng	10090	26843324	Irf8-Ifng circuit is a novel gastric innate immune mechanism in the host defense against infection with Helicobacter pylori.
196509	Irf8	10090	22942423	De-SUMOylation of IRF8 at residue Lys310 acts as a molecular mechanism to trigger innate immune responses in activated macrophages.
196509	Irf8	10090	26843324	Irf8-Ifng circuit is a novel gastric innate immune mechanism in the host defense against infection with Helicobacter pylori.
193230	Sppl3	10090	26851218	Sppl3 is an intramembrane aspartyl protease that controls natural killer cell maturation and cytotoxicity.
134957	Ahr	10090	21683686	Ahr deficiency impairs TLR and NFkB-mediated proinflammatory gene expression after activation by a classical stimulus, such as LPS.
134957	Ahr	10090	23954130	Innate expression of Ahr plays a protective role in T-cell-induced colitis by suppressing T helper 17 cells, thus inhibiting proinflammatory cytokine production.
134957	Ahr	10090	26857571	Uropathogenic Escherichia coli suppresses neutrophil migration early in bacterial cystitis by eliciting an Ido1-mediated increase in local production of kynurenines, which act through the Ahr to impair neutrophil chemotaxis.
142448	Ido1	10090	22355111	Ido1 limits innate and adaptive immunity to apoptotic self-antigens. Ido1-mediated inhibition of inflammation plays a key role in suppressing systemic autoimmune diseases.
142448	Ido1	10090	26857571	Uropathogenic Escherichia coli suppresses neutrophil migration early in bacterial cystitis by eliciting an Ido1-mediated increase in local production of kynurenines, which act through the Ahr to impair neutrophil chemotaxis.
154384	Lgals3	10090	22486577	Lgals3 influences the course of malaria in a Plasmodium species-specific manner.
154384	Lgals3	10090	26857579	Lgals3 plays an important role in innate immunity to infection and colonization of Helicobacter pylori.
212683	Trpm5	10090	26847546	Tuft cells express Il25 and elicit group 2 innate lymphoid cells in a Trpm5-dependent manner in response to parasite colonization.
162540	Il25	9606	24631157	Chitin induces IL25, IL33, and TSLP which are required to stimulate ILC2 production of IL5 and IL13. IL5 and IL13, in turn, are required for the accumulation of eosinophils and alternatively activated macrophages that are associated with allergy.
162540	Il25	9606	26847546	Tuft cells express Il25 and elicit group 2 innate lymphoid cells in a Trpm5-dependent manner in response to parasite colonization.
169968	Rorc	10090	24419270	Gata3 plays a generalized role in innate lymphoid cell (ILC) lineage determination and is critical for the development of gut Rorc+ group 3 ILCs subsets that maintain mucosal barrier homeostasis.
169968	Rorc	10090	24670648	Retinoic acid (RA) induces the maturation of lymphoid tissue inducer cells in developing lymph nodes by inducing RA receptor binding to the promoter region of Rorc.
169968	Rorc	10090	26878233	Rorc is differentially required in the maintenance of TH17 cell and group 3 innate lymphoid cell responses.
186803	Mb21d1	10090	25642965	Aberrant mitochondrial DNA (mtDNA) packaging promotes escape of mtDNA into the cytosol, where it engages the DNA sensor Mb21d1 and promotes Tmem173-Irf3-dependent signalling to elevate IFN-stimulated gene expression, potentiate type I IFN responses and confer broad viral resistance.
186803	Mb21d1	10090	26944200	The cationic polymer and vaccine adjuvant chitosan can engage the Tmem173/Mb21d1 (STING/cGAS) pathway to trigger innate and adaptive immune responses.
137341	Tmem173	10090	21820332	Tmem173 is involved in the innate immune recognition of Plasmodium falciparum AT-rich DNA and in the subsequent induction of type I IFNs.
137341	Tmem173	10090	22000020	Tmem173 activates Stat6 during viral infection to induce genes responsible for immune cell homing.
137341	Tmem173	10090	23055924	Dengue viral NS2B3 protease complex cannot degrade murine TMEM173, which confers protection against the viral infection.
137341	Tmem173	10090	24119841	Cyclic dinucleotides initiate the production of Tmem173(STING)-dependent proinflammatory genes and a negative-feedback to prevent sustained production that may otherwise lead to inflammation.
137341	Tmem173	10090	24131791	Cyclic-di-GMP-induced levels of Ifi202b suppress the expression of Tmem173 (STING).
137341	Tmem173	10090	25517615	The innate immune system plays a role in immunogenic tumour recognition. Tumor-cell-derived DNA triggers Ifnb1 production and dendritic cell activation via Tmem173 and Irf3 cytosolic DNA sensing pathways.
137341	Tmem173	10090	25692705	Unrepaired DNA lesions induce type I interferons via the Tmem173 pathway, resulting in enhanced anti-viral and anti-bacterial responses in Atm (-/-) mice.
137341	Tmem173	10090	25646421	Tmem173-deficient macrophages fail to express negative regulators of immune activation and are hyperresponsive to TLR ligands, producing abnormally high levels of proinflammatory cytokines.
137341	Tmem173	10090	25642965	Aberrant mitochondrial DNA (mtDNA) packaging promotes escape of mtDNA into the cytosol, where it engages the DNA sensor Mb21d1 and promotes Tmem173-Irf3-dependent signalling to elevate IFN-stimulated gene expression, potentiate type I IFN responses and confer broad viral resistance.
137341	Tmem173	10090	26590319	DNA vaccine-induced, Irf7-dependent signalling, as part of the Tmem173 (Sting) pathway, is critical for generation of both innate cytokine signalling and antigen-specific B and T cell responses.
137341	Tmem173	10090	26944200	The cationic polymer and vaccine adjuvant chitosan can engage the Tmem173/Mb21d1 (STING/cGAS) pathway to trigger innate and adaptive immune responses.
106840	TLR5	9606	15069060	TLR5 engagement with its ligand, flagellin, results in the activation of MAP kinases (ERK1/2, JNK, and p38) and degradation of NFKBIA (I-kappa-B-alpha).
106840	TLR5	9606	17283206	Toll-like receptor 5 (TLR5) is the TLR activated by bacterial flagellin and TLR5 residue 268 is responsible for human and mouse discrimination between flagellin molecules.
106840	TLR5	9606	11323673	TLR5 recognizes bacterial flagellin from both Gram-positive and Gram-negative bacteria, and its activation mobilizes the nuclear factor NF-kappaB and stimulates tumour necrosis factor-alpha (TNF) production.
106840	TLR5	9606	11489966	TLR5 expressed on the basolateral surface of intestinal epithelia mediates innate immune inflammatory responses to Salmonella by inducing epithelial pro-inflammatory gene expression.
106840	TLR5	9606	12794153	TLR5 forms heteromeric complexes with TLR4 as well as homomeric complexes. Signaling via heteromeric TLR5/TLR4 complexes is involved in the induction of macrophage nitric oxide (NO) production by Gram-negative flagellin.
106840	TLR5	9606	22434932	TLR5 forms a dimer upon binding to bacterial flagellin.
106840	TLR5	9606	22545147	TLR5 is highly expressed in mucosal dendritic cells and TLR5 signalling restricts regulatory T cell generation. (Demonstrated in mice)
106840	TLR5	9606	22863420	TLR5 deficiency in mice leads to a transient inability to manage proteobacteria which promotes chronic gut inflammation. (Demonstrated in mouse)
106840	TLR5	9606	26950764	CXCR1 regulates anti-Pseudomonas neutrophil responses through modulation of reactive oxygen species and interference with TLR5 expression.
80821	CXCR1	9606	26950764	CXCR1 regulates anti-Pseudomonas neutrophil responses through modulation of reactive oxygen species and interference with TLR5 expression.
195602	Stat6	10090	22000020	Stat6 is phosphorylated upon viral infection and translocates to the nucleus to induce genes responsible for immune cell homing.
195602	Stat6	10090	26953325	Stat6 signalling negatively regulates Î³Î´17 T cells, which plays a front-line role in mucosal immunity.
212845	Dhcr7	10090	26938778	Mir342 is involved in a novel post-transcriptional viral defence mechanism in IFN-activated macrophages by directly targeting Srebf2, Idi1, Dhcr7 and Sc4mol of the sterol pathway.
158311	Sc4mol	10090	26938778	Mir342 is involved in a novel post-transcriptional viral defence mechanism in IFN-activated macrophages by directly targeting Srebf2, Idi1, Dhcr7 and Sc4mol of the sterol pathway.
129163	Idi1	10090	26938778	Mir342 is involved in a novel post-transcriptional viral defence mechanism in IFN-activated macrophages by directly targeting Srebf2, Idi1, Dhcr7 and Sc4mol of the sterol pathway.
166203	Srebf2	10090	21408089	Srebf2 is a key transcriptional regulator of sterol biosynthesis in lipid metabolism, and Srebp2 protein levels in macrophages are negatively regulated by type I interferon signalling during viral infection.
166203	Srebf2	10090	26938778	Mir342 is involved in a novel post-transcriptional viral defence mechanism in IFN-activated macrophages by directly targeting Srebf2, Idi1, Dhcr7 and Sc4mol of the sterol pathway.
221078	Mir342	10090	26938778	Mir342 is involved in a novel post-transcriptional viral defence mechanism in IFN-activated macrophages by directly targeting Srebf2, Idi1, Dhcr7 and Sc4mol of the sterol pathway.
158292	Tgfb1	10090	26588780	Epithelial cell-derived cytokine Tgfb1 has a central role in the generation of the pulmonary immune response by enhancing the chemoactivity of type 2 innate lymphoid cells.
174662	Sod1	10090	26588782	Sod1 is essential in protecting hepatocytes from virus-induced, interferon-driven oxidative damage in the liver.
7247	LGALS3	9606	18825751	LGALS3 exerts a regulatory role in innate immunity by diminishing IL-1beta production and thus affecting resistance to Rhodococcus equi infection.
7247	LGALS3	9606	19951367	LGALS3, an abundant protein in macrophages and epithelial cells, belongs to a family of beta-galactoside-binding proteins, the galectins, with many proposed functions in immune response, development, differentiation, cancer and infection.
7247	LGALS3	9606	20208507	LGALS3 is part of the galectin family of proteins that have emerged as autonomous bacteria-killing agents, pointing to a principal role of these proteins in innate immunity.
7247	LGALS3	9606	22486577	LGALS3 influences the course of malaria in a Plasmodium species-specific manner. (Demonstrated in mice)
7247	LGALS3	9606	26589797	LGALS1 and LGALS3 play opposing roles in the inflammatory responses to Trichomonas vaginalis infection.
6929	LGALS1	9606	19561030	LGALS1, the prototype of a family of beta-galactoside-binding proteins, is involved in monocyte chemoattraction at sites of inflammation where it stimulates monocyte migration in a dose-dependent manner via the p44/42 MAP kinase pathway.
6929	LGALS1	9606	26589797	LGALS1 and LGALS3 play opposing roles in the inflammatory responses to Trichomonas vaginalis infection.
205873	Aim2	10090	20401524	Aim2 is uniquely involved in sensing infection with the intracellular bacteria Francisella tularensis and subsequently triggering caspase-1-mediated pro-inflammatory cytokine production and macrophage cell death, which activate other components of the immune system and eliminate the infected macrophages.
205873	Aim2	10090	20457908	Aim2 is required for innate immune recognition of Francisella tularensis where Aim2-deficient mice display an increased susceptibility to F. tularensis infection compared with wild-type mice.
205873	Aim2	10090	21562230	Aim2-containing inflammasomes are activated in response to cytosolic DNA; this response is augmented in keratinocytes from psoriatic lesions and contributes to the auto-inflammatory disease. (Demonstrated in human)
205873	Aim2	10090	26590313	During influenza A virus infection, host-derived DNA accumulates in the lung microenvironment and is sensed by Aim2, which limits immune-mediated damage to infected tissues.
212081	Irf7	10090	21820332	Irf7 is involved in the innate immune recognition of Plasmodium falciparum AT-rich DNA and in the subsequent induction of type I IFNs. Mice lacking Irf3/Irf7 are resistant to otherwise lethal cerebral malaria.
212081	Irf7	10090	24362933	Plasmodium RNA is a pathogen-associated molecular pattern (PAMP) capable of activating a type I IFN response via the cytosolic pattern recognition receptors Ifih1 and Mavs, as well as via transcription factors Irf3 and Irf7.
212081	Irf7	10090	25531441	Genetic deletion of Eif4ebp1 or Eif4ebp2 potentiates innate antiviral immunity by enhancing translation of Irf7.
212081	Irf7	10090	26590319	DNA vaccine-induced, Irf7-dependent signalling, as part of the Tmem173 (Sting) pathway, is critical for generation of both innate cytokine signalling and antigen-specific B and T cell responses.
164788	Cxcr3	10090	21518789	Cxcr3 expression on recruited peritoneal macrophages and granulocytes increases following sepsis, and deletion of Cxcr3 significantly increases mortality to a septic challenge in neonatal mice.
164788	Cxcr3	10090	24130498	Inflammatory monocyte activation status, as measured by dual production of TNF-alpha and IL-12, was severely impaired in Cxcr3(-/-) mice. Deletion of Cxcr3 in mice resulted in selective loss of ability to control T. gondii infection specifically in the lamina propria compartment.
164788	Cxcr3	10090	25466888	Cxcr3 expression in innate CD8+ T cells defines protective antibacterial and cancer immunity upon Il15 stimulation.
164788	Cxcr3	10090	26595890	A Cxcr3-dependent innate antiviral pathway operates at epithelial surfaces to induce chemokines and neutrophil activity prior to the induction of interferons.
204791	Cd48	10090	26564814	Invariant natural killer T cell activation induced by mast cells exposed to alpha-galactosylceramide is regulated by costimulatory molecules Cd48 and Tnfsf4.
201525	Tnfsf4	10090	26564814	Invariant natural killer T cell activation induced by mast cells exposed to alpha-galactosylceramide is regulated by costimulatory molecules Cd48 and Tnfsf4.
186402	Clec4e	10090	21267996	Clec4e, a C-type lectin receptor, is a pattern recognition receptor critical for immune responses to fungi. Clec4e is coupled to Syk kinase and signals via Card9 to activate NFKB, which in turns induces both innate and adaptive immunity.
186402	Clec4e	10090	24212132	The expression of Clec4e (Mincle) and its downstream signal phospho-Syk/Syk increases after cerebral ischemia and reperfusion.
186402	Clec4e	10090	26558717	Clec4d is an inducible myeloid-expressed C-type lectin receptor, whose expression is tightly linked to that of Clec4e.
186345	Clec4d	10090	26558717	Clec4d is an inducible myeloid-expressed C-type lectin receptor, whose expression is tightly linked to that of Clec4e.
164802	Mtap1s	10090	26565030	Map1s (Mtap1s) controls bacterial phagocytosis through TLR signalling by interacting directly with Myd88.
205936	Il1b	10090	21170027	Il1b acts as a growth factor for neutrophil progenitors and as a survival factor for mature neutrophils. In the absence of Ikbkb, the Il1b production is enhanced and provides a compensatory mechanism for maintaining antibacterial defense when NFKB is inhibited.
205936	Il1b	10090	21228274	Il1b secretion in macrophages is regulated by autophagy by two mechanisms; sequestering of pro-Il1b in autophagosome during TLR stimulation, and processing/secretion of Il1b in a Nlrp3- and TRIF-dependent manner.
205936	Il1b	10090	21602824	Il1b secretion is induced only during viable E. coli infection (as oppose to heat-killed E. coli or LPS), viable bacteria specifically elicit cleavage of pro-Il1b.
205936	Il1b	10090	21270399	Il1b derived from alveolar macrophages is the critical mediator which induces chemokine production in nonhematopoietic cells in the lung, resulting in swift and robust recruitment of infection-controlling neutrophils into the airways.
205936	Il1b	10090	21628463	Il1b secretion is tightly regulated by the redox status in myeloid cells. TLR engagement in monocytes induces ROS generation followed by a sustained antioxidant response and efficient Il1b secretion. In macrophages, the antioxidant systems are in an upregulated state, and therefore buffers the TLR induction of the redox response, which results in low Il1b processing and secretion. (Demonstrated i…
205936	Il1b	10090	22426547	Il1b is an inflammatory cytokine that binds to its primary receptor, Il1r1, that then recruits the accessory protein Il1rap to form a signalling-competent heterotrimeric complex. (Demonstrated in human)
205936	Il1b	10090	24022484	Under acidic conditions both pro-inflammatory forms of Il1a and Il1b are regulated independently of the NLRP3 inflammasome.
205936	Il1b	10090	24692555	Group B streptococcus induces Il1b, and activates the NLRP3 inflammasome by a mechanism that requires hemolysin-mediated lysosomal leakage, which enhances the interaction of bacterial RNA with NLRP3.
205936	Il1b	10090	25422455	Actin polymerization is required for Nlrc4-dependent regulation of intracellular bacterial burden, inflammasome assembly, pyroptosis, and Il1b production.
205936	Il1b	10090	25483963	Autophagy causes PELI3 degradation during Tlr4-signalling, subsequently inhibiting Il1b expression and impairing the hyperinflammatory phase during sepsis.
205936	Il1b	10090	25689249	Activation of the Nlrp3 inflammasome is detrimental during leishmaniasis. Mice lacking the inflammasome components Nlrp3, Pycard, Casp1 exhibit defective Il1b and Il18 production at the infection site and are resistant to cutaneous Leishmania major infection.
205936	Il1b	10090	25781937	Escherichia coli toxin CNF1 promotes the maturation/secretion of Il1b while the Î±-hemolysin toxin inhibits Il1b secretion without affecting the recruitment of Ly6g+ cells.
205936	Il1b	10090	25683052	Mirlet7f and its target Tnfaip3 regulate immune responses to Mycobacterium tuberculosis and control bacterial burden by augmenting the production of Tnf and Il1b.
205936	Il1b	10090	25595775	Defb1 is important for the control of early mucosal Candida infection and plays a critical role in the induction of innate inflammatory mediators including, Il1b, Il6, Cxcl1, Il17a, and Il17f.
205936	Il1b	10090	26056255	Type 1 regulatory (Tr1) cells suppress Il1b transcription and Casp1 activation via an IL10R âdependent mechanism.
205936	Il1b	10090	26536497	NLRP3 inflammasome formation is dispensable for alum-induced innate immunity but Il1a and Il1b are both necessary for alum-induced neutrophil influx in vivo.
163502	Il18	10090	22940097	Il18 secreted by inflammatory monocytes is critical for the differentiation of CD8(+) T and NK lymphocytes into antimicrobial effector cells.
163502	Il18	10090	24549849	Both Nlrp3 and Nlrp1a are important regulators of Toxoplasma proliferation and Il18 signaling is required to mediate host resistance to acute toxoplasmosis.
163502	Il18	10090	25395539	Flagellin induces Tlr5-dependent Il22 production and Nlrc4-dependent Il18 production to promote a protective gene expression program in intestinal epithelial cells and elimination of rotavirus-infected cells.
163502	Il18	10090	25689249	Activation of the Nlrp3 inflammasome is detrimental during leishmaniasis. Mice lacking the inflammasome components Nlrp3, Pycard, Casp1 exhibit defective Il1b and Il18 production at the infection site and are resistant to cutaneous Leishmania major infection.
163502	Il18	10090	25680273	Il22 augments the expression of Il18 mRNA and inactive precursor protein (proIL-18) in intestinal epithelial cells after Toxoplasma gondii or Citrobacter rodentium infection and maintains the homeostatic amount of proIL-18 in the ileum.
163502	Il18	10090	26638072	Microbiota-associated metabolites modulate Nlrp6 inflammasome signalling, epithelial Il18 secretion, and anti-microbial pathways.
163502	Il18	10090	26638073	Colitis severity is controlled at the level of Il18 signalling in intestinal epithelial cells.
211907	Nlrp6	10090	22763455	Nlrp6 is a negative regulator of inflammatory signalling and impedes the clearance of both Gram-positive and -negative bacterial pathogens.
211907	Nlrp6	10090	26494172	Nlrp6 functions with Dhx15 as a viral RNA sensor to induce IFN-stimulated genes, and this effect is especially important in the intestinal tract.
211907	Nlrp6	10090	26638072	Microbiota-associated metabolites modulate Nlrp6 inflammasome signalling, epithelial Il18 secretion, and anti-microbial pathways.
148568	Atg5	10090	17921696	Atg12::Atg5 conjugate is a key regulator of the autophagic process to eliminate pathogens such as Streptococcus, M. tuberculosis, Listeria, and herpesvirus. Atg12::Atg5 also associates with components of the RIG-I pathway to negatively regulate type I IFN response and promote RNA virus replication.
148568	Atg5	10090	25650776	Atg5 knockout mice develop systemic and hepatic inflammation with high-fat diet and low-dose lipolysaccharide treatment.
148568	Atg5	10090	26649827	Atg5 plays a unique role in protection against M. tuberculosis by preventing polymorphic mononuclear cell (PMN)-mediated immunopathology. Loss of Atg5 in PMNs can cause susceptibility to M. tuberculosis.
106270	IL10	9606	20154735	IL10 expression is regulated in different immune cells has revealed some of the molecular mechanisms involved at the levels of signal transduction, epigenetics, transcription factor binding and gene activation.
106270	IL10	9606	20435894	IL10 is a potent anti-inflammatory cytokine that is crucial for down-regulating pro-inflammatory genes which are induced by Toll-like Receptor (TLR) signalling. It also plays a role in microRNA function, specifically its inhibitory effect on miR-155 expression in response to LPS.
106270	IL10	9606	20883317	IL10 is a pleiotropic cytokine released in many tissues that mediates anti-inflammatory effects. IL10 also has an immunomodulatory role by stimulating NKG2D ligand expression on macrophages, thereby rendering them susceptible to natural killer (NK) cell elimination.
106270	IL10	9606	21849677	IL10 contributes to antiviral innate immunity during acute infection by restricting activation-induced death in natural killer (NK) cells. Blockade of Il10 receptor during acute murine cytomegalovirus (CMV) infection markedly reduced the accumulation of cytotoxic NK cells in the spleen and lung. (Demonstrated in murine model)
106270	IL10	9606	22268692	IL10 has opposing functions in anti-microbial responses in its capacity to mediate protective immunity against some organisms but increase susceptibility to other infections.
106270	IL10	9606	22876184	IL10-mediated suppression of natural killer/dendritic cell crosstalk leads to prolonged mouse cytomegalovirus (MCMV) persistence due to poor priming of MCMV-specific T cells. (Demonstrated in mouse)
106270	IL10	9606	23071313	IL10 induces MIR187 to limit the expression of pro-inflammatory cytokines.
106270	IL10	9606	23980205	MIR145 directly targets HDAC11 to promote IL10 expression in TLR4-triggered macrophages.
106270	IL10	9606	24265436	HIV-1 infection of macrophages modulates host responses to co-infection with Mycobacterium tuberculosis by attenuating IL10 responses thus contributing to the pathogenesis of tuberculosis in HIV-1âinfected patients.
106270	IL10	9606	25005359	Secreted CCNA2 (CCN1) promotes anti-inflammatory cytokine IL10 release from epithelial cells via integrin Î±VÎ²6-PKC, and this subsequently suppresses TNF, CXCL2 and neutrophil infiltration in the lungs.
106270	IL10	9606	26535690	MIR29A inhibits IL10-induced cytokine release by targeting JAK-STAT3 in monocytes during sepsis.
50702	STAT3	9606	17971840	STAT3 is a transcription factor that mediates interleukin-10 (IL-10) cytokine signalling.
50702	STAT3	9606	19667404	STAT3 and SRC have a role in the immunoregulation of dendritic cells (DCs) where apoptotic cells-induced inhibition of dendritic cells (DCs) requires MerTK-dependent activation of SRC and STAT3.
50702	STAT3	9606	20040863	STAT3 mediates mucosa-protective and anti-inflammatory functions in epithelial and myeloid cells and promotes inflammation in T cells.
50702	STAT3	9606	20493732	STAT3 binds to multiple genes involved in Th17 cell differentiation, cell activation, proliferation, and survival, regulating both expression, epigenetic modifications, and targets the T cell function in inflammation and homeostasis.
50702	STAT3	9606	20581311	STAT3 is an essential mediator of emergency granulopoiesis via its regulation of transcription factors CEBPA and CEBPB that direct granulocyte colony-stimulating factor (G-CSF)-responsive myeloid progenitor expansion.
50702	STAT3	9606	21810606	STAT3 is a negative regulator of type I IFN-mediated anti-viral responses. (Demonstrated in mouse)
50702	STAT3	9606	25510212	In alveolar epithelium, IL22 upregulates DEFB4A gene expression via STAT3.
50702	STAT3	9606	26535690	MIR29A inhibits IL10-induced cytokine release by targeting JAK-STAT3 in monocytes during sepsis.
771638	MIR29A	9606	26535690	MIR29A inhibits IL10-induced cytokine release by targeting JAK-STAT3 in monocytes during sepsis.
204141	Trim12c	10090	26503954	Trim12c interacts with Traf6, a key protein in pathogen recognition receptor signalling, and reciprocally enhances its ubiquitination, leading to cooperative activation of IFN and NF-kB pathways.
3941	MX1	9606	18062906	MX1 is an interferon-induced member of the dynamin superfamily of large GTPases, which inhibit a wide range of viruses by blocking an early stage of the replication cycle.
3941	MX1	9606	20538602	MX1 GTPase is a key mediator of cell-autonomous innate immunity against a broad range of viruses such as influenza and bunyaviruses.
3941	MX1	9606	22531919	MX1 expression is upregulated by alpha-defensins in gigival epithelial cell.
3941	MX1	9606	24448803	Antiviral specificity of MX1 against orthomyxoviruses (influenza A and Thogoto viruses) is determined by a few critical amino acids in the disordered loop L4 of MX1.
3941	MX1	9606	25525793	NRAV, a long noncoding RNA, modulates antiviral responses by negatively regulating the initial transcription of multiple critical interferon-stimulated genes, including IFITM3 and MX1, by affecting their histone modification.
3941	MX1	9606	26507657	MX1 prevents influenza A virus (IAV) replication by disassembling into dimers and binding to IAV nucleoprotein synthesized following primary transcription.
128365	Lyn	10090	20385881	Lyn/PI3K module negatively regulates activation of murine macrophages while Inpp5d (SHIP-1) promotes it.
128365	Lyn	10090	22491248	Overexpression of Lyn results in endotoxin hypersensitivity due to the increased activation of dendritic cells leading to an over-production of Ifng by natural killer cells.
128365	Lyn	10090	26517880	Lyn regulates the macrophage basal-state signalling checkpoint, and the signalling reorganization initiated by receptor clustering allows cells to discriminate optimally between pathogens and nonpathogens.
163641	Dhx15	10090	26494172	Nlrp6 functions with Dhx15 as a viral RNA sensor to induce IFN-stimulated genes, and this effect is especially important in the intestinal tract.
136575	Il17a	10090	21822258	Il17a signalling enhances the mRNA stability of chemokine Cxcl1 through Traf3ip2, Traf2-Traf5 and the RNA-binding protein Srsf1.
136575	Il17a	10090	22384827	Il17a is significantly upregulated in both S. pyogenes inoculated and mock inoculated mice, indicating that the cytokine production can be triggered by inoculation trauma alone.
136575	Il17a	10090	23295184	IL17A inhibits the release of IL23 during pulmonary inflammation and serves as part of negative feedback loop to control antibacterial immunity.
136575	Il17a	10090	24337746	Il17a is an intrinsic regulator in coordinating neutrophil and macrophage antimicrobial activity to provide protection against acute pneumonic plague.
136575	Il17a	10090	24670684	In mouse model of leukocyte adhesion deficiency type I disease, defective neutrophil recruitment is associated with dysregulated local overproduction of IL17, which drives inflammatory periodontal bone loss.
136575	Il17a	10090	25595775	Defb1 is important for the control of early mucosal Candida infection and plays a critical role in the induction of innate inflammatory mediators including, Il1b, Il6, Cxcl1, Il17a, and Il17f.
136575	Il17a	10090	26488187	Il17a is rapidly produced during lung injury and significantly contributes to early immunopathogenesis, a process that is orchestrated largely by a distinct population of pulmonary type 3 innate lymphoid cells.
213476	Ern1	10090	22883233	Hyperactivated Ern1 (IRE1Î±) increases Txnip mRNA stability by reducing levels of a Txnip destabilizing microRNA, miR-17. In turn, elevated Txnip protein activates the Nlrp3 inflammasome, causing procaspase-1 cleavage and interleukin 1Î² (IL-1Î²) secretion. (Demonstrated in human)
213476	Ern1	10090	26173697	ERN1-mediated persistent reactive oxygen species generation is a mechanism used by macrophages to kill bacterial pathogens that evade the initial oxidative burst.
83167	C5	9606	18039528	C5 is the fifth component of complement and is comprised of alpha (C5a) and beta (C5b) polypeptide chains, C5a is a complement anaphylatoxin that can stimulate the generation of nitric oxide along with the secretion of histamine and leukotriene LTC4 from several cell types and can bring about an increase in vascular permeability that facilitates eosinophil accumulation at sites of allergic inflam…
83167	C5	9606	10441679	C5 is the fifth component of complement and is comprised of alpha (C5a) and beta (C5b) polypeptide chains. C5b first associates with complement component 6 (C6), which in turn initiates the assembly of the cytolytic membrane attack complex (MAC).
83167	C5	9606	21063021	C5 fragments are released from neutrophils upon their activation of the alternative complement pathway and this further amplifies neutrophil pro-inflammatory responses.
83167	C5	9606	25539819	C5 (C5a) is a critical mediator in blood during Candida albicans infection.
83167	C5	9606	26176669	Staphylococcus aureus-induced neutrophil dysfunction correlates with the loss of C5AR1 from the neutrophil cell surface and results in C5a (C5)-induced CEACAM8 overexpression.
54589	CEACAM8	9606	26176669	Staphylococcus aureus-induced neutrophil dysfunction correlates with the loss of C5AR1 from the neutrophil cell surface and results in C5a (C5)-induced CEACAM8 overexpression.
59445	C5AR1	9606	20159852	C5AR1 engage in crosstalk with TLR2 and Porphyromonas gingivalis, a major oral and systemic pathogen with complement C5 convertase-like activity, synergizes with C5a (fragment of complement protein C5) to increase cyclic adenosine monophosphate (cAMP) concentrations, resulting in suppression of macrophage immune function and enhanced pathogen survival.
59445	C5AR1	9606	20457757	C5AR1 is a receptor for C5a, a chief component of complement activation produced via all three complement pathways (i.e., lectin, classical, and alternative), stimulated tissue-resident macrophages, but not dendritic cells, to produce inflammatory cytokines including IL-6, in synergy with Toll-like receptor signalling or, notably, granulocyte/macrophage colony-stimulating factor (GM-CSF).
59445	C5AR1	9606	23479227	Increasing circulating C5AR1 serum concentration, coupled with decreased C5AR1 expression on neutrophils is correlated with lethality from septic shock.
59445	C5AR1	9606	26176669	Staphylococcus aureus-induced neutrophil dysfunction correlates with the loss of C5AR1 from the neutrophil cell surface and results in C5a (C5)-induced CEACAM8 overexpression.
213369	Zbp1	10090	22423968	Zbp1 interacts with Ripk3 to mediate virus-induced necrosis.
213369	Zbp1	10090	26146945	Ddx58 acts in parallel with Zbp1 in an RNA polymerase III-dependent manner to initiate glial responses to herpes simplex virus-1.
197593	Hs2st1	10090	26150541	Inactivation of Hs2st1 in neutrophils substantially reduces their bactericidal activity, and Hs2st1-deficient mice are more susceptible to systemic infection with the pathogenic bacterium group B Streptococcus.
163345	Zfp36	10090	26019272	Dusp1 modulates the phosphorylation status of mRNA-destabilizing protein Zfp36 to regulate macrophage immune response to lipopolysaccharide.
155234	Dusp1	10090	21959016	Dusp1 is a negative regulator of MAPK-dependent induction of Il6 and Il8 in response to the coronavirus infectious bronchitis virus (IBV). (Demonstrated in human)
155234	Dusp1	10090	22464096	Dusp1 antagonizes p38 MAPK activity to induce Il12b expression, and may play a role in the development of Th1 type immune response and anti-microbial defence.
155234	Dusp1	10090	26019272	Dusp1 modulates the phosphorylation status of mRNA-destabilizing protein Zfp36 to regulate macrophage immune response to lipopolysaccharide.
189999	Cxcr4	10090	26026270	Bacterial cell wall glucosaminyl-muramyl dipeptides (GMDPs) bind to the transcription factor Ybx1 to upregulate Nfkb2 and Cxcr4 gene expression.
172544	Nfkb2	10090	26026270	Bacterial cell wall glucosaminyl-muramyl dipeptides (GMDPs) bind to the transcription factor Ybx1 to upregulate Nfkb2 and Cxcr4 gene expression.
182925	Ybx1	10090	25398005	Ybx1 controls intracellular Il6 mRNA levels in a cell type-specific manner, leading to functions that are dependent on the extracellular and intracellular distribution of Ybx1.
182925	Ybx1	10090	26026270	Bacterial cell wall glucosaminyl-muramyl dipeptides (GMDPs) bind to the transcription factor Ybx1 to upregulate Nfkb2 and Cxcr4 gene expression.
75571	SYK	9606	26032420	Antibody-dependent enhancement (ADE) of Dengue virus serotype 2 (DENV-2) elevates mature IL1B secretion via SYK signalling pathway in primary monocytes.
130583	Il7	10090	26034215	Il7 is produced by intestinal epithelial cells in response to Citrobacter rodentium infection and plays a critical role in the protective immunity against this intestinal attaching and effacing bacterium.
259066	Tlr5	10090	22434932	Tlr5 forms a dimer upon binding to bacterial flagellin. (Demonstrated in human)
259066	Tlr5	10090	22545147	Tlr5 is highly expressed in mucosal dendritic cells and Tlr5 signalling restricts regulatory T cell generation.
259066	Tlr5	10090	22863420	Tlr5 deficiency in mice leads to a transient inability to manage proteobacteria which promotes chronic gut inflammation.
259066	Tlr5	10090	24442437	Flagellin-specific IgG1 antibody response is induced through a Tlr5-, inflammasome-, and Myd88-independent pathway.
259066	Tlr5	10090	25395539	Flagellin induces Tlr5-dependent Il22 production and Nlrc4-dependent Il18 production to promote a protective gene expression program in intestinal epithelial cells and elimination of rotavirus-infected cells.
259066	Tlr5	10090	26003491	Indirect Tlr5-dependent stimulation of airway conventional dendritic cells is essential to flagellin's mucosal adjuvant activity.
17225	IRF7	9606	19152337	IRF7 increases the expression of a broad range of IFN-stimulated genes including immunomodulatory cytokines and genes involved in antigen processing and presentation.
17225	IRF7	9606	15664995	IRF7 is activated in response to virus infection and stimulates the transcription of a set of cellular genes involved in host antiviral defence.
17225	IRF7	9606	15361868	IRF7 forms a complex with MYD88 and TRAF6 and this complex formation, as well as TRAF6-dependent IRF7 ubiquitination, is required for TLR-mediated interferon (IFN)-alpha induction.
17225	IRF7	9606	21820332	IRF7 is involved in the innate immune recognition of Plasmodium falciparum AT-rich DNA and in the subsequent induction of type I IFNs. Mice lacking Irf3/Irf7 are resistant to otherwise lethal cerebral malaria. (Demonstrated in mouse)
17225	IRF7	9606	25505178	Coronavirus engages papain-like proteases to escape from the innate antiviral response of the host by inhibiting TP53-IRF7-IFNB1 signalling.
17225	IRF7	9606	25520509	Paramyxoviruses trigger the DNA-damage response, a pathway required for RPS6KA5 activation of phospho Ser 276 RELA formation to trigger the IRF7-DDX58 amplification loop necessary for mucosal interferon production.
17225	IRF7	9606	25911105	AIP is a novel inhibitor of IRF7 and a negative regulator of innate antiviral signalling.
60515	AIP	9606	25911105	AIP is a novel inhibitor of IRF7 and a negative regulator of innate antiviral signalling.
172144	Ager	10090	22386596	Ager is a native receptor for complement component C1qa. (Demonstrated in human)
172144	Ager	10090	25911757	S100a8/S100a9 are proinflammatory proteins that activate natural killer cells via Ager signalling.
168119	S100a9	10090	21239714	S100a9 forms a complex with S100a8 and the complex is the site of interplay between extracellular Ca(2+) entry and intra-phagosomal reactive oxygen species production. S100a8 :: S100a9 acts as Ca(2+) sensor in phagosomal ROS production.
168119	S100a9	10090	21382888	S100a9-deficient murine neutrophils exhibited a reduce secretion of cytokines in response to Tlr4 stimulation. In contrast, S100a9-deficient dendritic cells showed an exacerbated release of cytokines after TLR stimulation. S100a9 has no effect on the inflammatory status of macrophages.
168119	S100a9	10090	22423963	S100a9 is strongly upregulated in neutrophils upon bacterial infection, and sequesters zinc as a mechanism of nutritional immunity. Salmonella typhimurium overcomes this defence mechanism by expressing a high affinity zinc transporter.
168119	S100a9	10090	23133376	S100A9 forms a heterodimer with S100A8 and is a key player in protective innate immunity during Klebsiella pneumonia infection.
168119	S100a9	10090	25911757	S100a8/S100a9 are proinflammatory proteins that activate natural killer cells via Ager signalling.
168077	S100a8	10090	21239714	S100a8 forms a complex with S100a9 and the complex is the site of interplay between extracellular Ca(2+) entry and intra-phagosomal reactive oxygen species production. S100A8 :: S100A9 acts as Ca(2+) sensor in phagosomal ROS production.
168077	S100a8	10090	22423963	S100a8 is strongly upregulated in neutrophils upon bacterial infection, and sequesters zinc as a mechanism of nutritional immunity. Salmonella typhimurium overcomes this defence mechanism by expressing a high affinity zinc transporter.
168077	S100a8	10090	23133376	S100A8 forms a heterodimer with S100A9 and is a key player in protective innate immunity during Klebsiella pneumonia infection.
168077	S100a8	10090	25911757	S100a8/S100a9 are proinflammatory proteins that activate natural killer cells via Ager signalling.
161461	Lcp2	10090	25929249	Lcp2 is a critical determinant of natural killer (NK)-cell development and NK cell mediated elimination of missing-self target cells.
145267	Ticam2	9606	21494017	Ticam2 deficiency results in the impairment of LPS-stimulated TNF-alpha protein translation.
145267	Ticam2	9606	25505250	Adaptor proteins Ticam1 and Ticam2 have a novel function in Tlr2-mediated signal transduction.
145267	Ticam2	9606	26065469	Ticam2 mediates antibacterial defence during Gram-negative pneumonia by inducing Ifng at the primary site of infection.
145267	Ticam2	9606	25808990	Intracellular Sef/IL-17R (SEFIR) domain of Il17rd targets TIR adaptor proteins Myd88, Tirap, Ticam1, Ticam2 and Traf6 to inhibit TLR downstream signalling.
148134	Tirap	10090	21705416	Tirap Ser180Leu polymorphism is significantly associated with Behcet's disease in UK, but not Middle Eastern, patients. It is suggested that the Ser180Leu functional variant of Tirap will lead to greater cytokine production and tissue damage with persistence of mucosal lesions upon encounter with pathogens. (Demonstrated in human)
148134	Tirap	10090	25808990	Intracellular Sef/IL-17R (SEFIR) domain of Il17rd targets TIR adaptor proteins Myd88, Tirap, Ticam1, Ticam2 and Traf6 to inhibit TLR downstream signalling.
140856	Il17rd	10090	25808990	Intracellular Sef/IL-17R (SEFIR) domain of Il17rd targets TIR adaptor proteins Myd88, Tirap, Ticam1, Ticam2 and Traf6 to inhibit TLR downstream signalling.
21550	DHX33	9606	25816776	RNA cleavage products, catalyzed by RNASEL, bind to DHX33 to facilitate the formation of a complex with MAVS and NLRP3 during viral infection.
105248	RNASEL	9606	19075243	RNASEL, antiviral endoribonuclease, is the terminal component of an RNA decay pathway that is an important mediator of IFN-induced antiviral activity and is required for the optimal induction of pro-inflammatory cytokines that play essential roles in host defence from bacterial pathogens.
105248	RNASEL	9606	19075243	RNASEL regulates the expression of the endolysosomal protease, cathepsin-E, and endosome-associated activities, that function to eliminate internalized bacteria and may contribute to RNASEL antimicrobial action.
105248	RNASEL	9606	20833746	RNASEL-mediated cleavage of Hepatitis C virus (HCV) RNA generates suppressor of virus RNA (svRNA) that activates DDX58 (RIG-I), thus propagating innate immune signalling to the interferon (IFN)-beta gene.
105248	RNASEL	9606	21190483	RNASEL cleaves RNA during viral infections and the cleavage products induces the RIG-I pathway and production of IFNB gene. In addition, RNASEL is implicated in the protection of central nervous system against viral-induced demyelination. A broader role in innate immunity is suggested by involvement of RNASEL in cytokine induction and endosomal pathways that suppress bacterial infections.
105248	RNASEL	9606	25816776	RNA cleavage products, catalyzed by RNASEL, bind to DHX33 to facilitate the formation of a complex with MAVS and NLRP3 during viral infection.
11512	IL32	9606	25820174	IL32 enhances host immunity to Mycobacterium tuberculosis.
24117	ELAVL1	9606	14981256	ELAVL1 is a protein that binds to specific mRNA subsets, preferentially within 3' untranslated regions, and is a pivotal posttranscriptional regulator of gene expression.
24117	ELAVL1	9606	17534146	ELAVL1 is an RNA-binding protein can stabilize and/or regulate the translation of target mRNAs, thereby affecting the cellular responses to immune, proliferative, and damaging agents. It has a broad anti-apoptotic function where it increases the stability of a target mRNA encoding the pro-survival deacetylase SIRT1 and promotes the expression of mRNAs encoding BCL2 and MCL1, two major anti-apopto…
24117	ELAVL1	9606	25678110	ELAVL1 is required for the stabilization of IFNB1 mRNA, and suppression of ELAVL1 leads to impaired expression of IFNB1 in response to poly(I:C) treatment.
30697	CYLD	9606	18636086	CYLD is a negative regulator of DDX58(RIG-I)-mediated antiviral response by removing Lys 63-linked polyubiquitin chains from RIG-I and TBK1.
30697	CYLD	9606	18643924	CYLD is a crucial negative regulator of innate immune response in Escherichia coli pneumonia.
30697	CYLD	9606	21119682	CYLD is a deubiquitinase that counteracts E3 ligases and therefore play a prominent role in the downregulation of NF-ÎºB signalling and homeostasis.
30697	CYLD	9606	21498625	CYLD is a deubiquitinase that act as a negative regulator of TLR3 induction in response to LPS.
30697	CYLD	9606	21946435	CYLD plays a key role in Type I IFN receptor signalling during vesicular stomatitis virus (VSV) infection. In the absence of CYLD, IFN-beta is ineffective in the induction of antiviral genes. (Demonstrated in mice)
30697	CYLD	9606	22057290	The E3 ligase ITCH and deubiquitinase CYLD act together to regulate TAK1 and inflammation.
30697	CYLD	9606	25909817	MIR362 promotes natural killer-cell function by the down-regulation of CYLD.
126785	MIR362	9606	25909817	MIR362 promotes natural killer-cell function by the down-regulation of CYLD.
200543	Uvrag	10090	25917095	Mir125a regulates the innate host defense by inhibiting the activation of autophagy and antimicrobial effects against Mycobacterium tuberculosis through targeting Uvrag.
224267	Mir125a	10090	25917095	Mir125a regulates the innate host defense by inhibiting the activation of autophagy and antimicrobial effects against Mycobacterium tuberculosis through targeting Uvrag.
187635	Ptpn6	10090	25876760	Bordetella pertussis CyaA toxin plays a role in evading nitric oxide-mediated killing in macrophages through a cAMP-dependent activation of the Ptpn6 phosphatase.
102192	CTSK	9606	18762176	CTSK is a cathepsins, which are key modulators of cell death and inflammatory responses.
102192	CTSK	9606	25884905	Cleavage of CAMP by cathepsins CTSS and CTSK impairs its antimicrobial activity against Pseudomonas aeruginosa and Staphylococcus aureus.
102189	CTSS	9606	18762176	CTSS is a member of the Cathepsins protein family, which are key modulators of cell death and inflammatory responses.
102189	CTSS	9606	21145045	CTSS is an endosomal and lysosomal protease that is upregulated during various inflammatory disorders. TLR2, 3, 4 ligand engagement increases the proteolytic activities of CTSS in macrophages. (Demonstrated in murine model)
102189	CTSS	9606	25884905	Cleavage of CAMP by cathepsins CTSS and CTSK impairs its antimicrobial activity against Pseudomonas aeruginosa and Staphylococcus aureus.
223547	Mir328	10090	25894560	Mir328 is a key element of the host response to pulmonary infection with non-typeable Haemophilus influenzae and its inhibition in macrophages augments phagocytosis, the production of reactive oxygen species, and microbicidal activity.
126687	MIR328	9606	25894560	MIR328 is a key element of the host response to pulmonary infection with non-typeable Haemophilus influenzae and its inhibition in macrophages augments phagocytosis, the production of reactive oxygen species, and microbicidal activity.
201591	Camp	10090	21448240	CAMP (LL-37), at sufficiently low concentrations, is able to reduce fungal infectivity by inhibiting C. albicans adhesion to plastic surfaces, oral epidermoid cells, and the urinary bladders of female mice. The inhibitory effects of LL-37 on cell adhesion and aggregation were mediated by its preferential binding to mannan and chitin in the fungal cell wall. (Demonstrated in human)
201591	Camp	10090	21464330	Camp (LL-37) translocates across the E. coli outer membrane and halts bacterial growth by interfering cell wall biogenesis. (Demonstrated in human)
201591	Camp	10090	21762664	Camp protects against colitis induction in mice. The increased expression of Camp in monocytes involves the activation of Tlr9/ERK signalling pathway by bacterial DNA.
201591	Camp	10090	21832078	Camp expression is induced upon endoplasmic reticulum stress via NF-kB-C/EBP-alpha activation. (Demonstrated in human)
201591	Camp	10090	22031815	mCRAMP (Camp) reduces influenza A viral load and disease severity in mice.
201591	Camp	10090	25554785	The transcription factor Zfp423 is necessary for adipocyte activation and impaired adipogenesis is observed in Zfp423(nur12) mice.
201591	Camp	10090	25896094	Camp plays an important role in the innate immune response against pathogens in bacterial central nervous system infections.
172024	Il4	10090	21566158	Exogenous Il4 was sufficient to drive the accumulation of tissue macrophages through self-renewal revealing that the expansion of innate cells necessary for pathogen control or wound repair can occur without recruitment of potentially tissue-destructive inflammatory cells.
172024	Il4	10090	23991011	IL4 attenuates Th1-chemokines expression at the site of inflammation reducing Th1 lymphocyte recruitment and limits pathogen clearance
172024	Il4	10090	25888258	Nlrp12 is an intrinsic negative regulator of T-cell-mediated immunity. Altered NF-kB regulation and Il4 production are key mediators of Nlrp12-associated disease.
264083	Nlrp12	10090	25888258	Nlrp12 is an intrinsic negative regulator of T-cell-mediated immunity. Altered NF-kB regulation and Il4 production are key mediators of Nlrp12-associated disease.
6693	DEFB103B	9606	20385753	DEFB103B inhibits cell wall biosynthesis in staphylococci by inhibiting those enzymes which use the bactoprenol bound cell wall building block Lipid II as substrate.
6693	DEFB103B	9606	21809339	DEFB103B exerts anti-inflammatory activities by specifically targeting TLR signalling pathways to transcriptionally repress pro-inflammatory genes.
6693	DEFB103B	9606	22922323	DEFB103B (hBD-3) is sequestered by extracellular DNA in Haemophilus influenzae biofilms to reduce its antimicrobial activity.
6693	DEFB103B	9606	22951718	DEFB103B (hBD3) induces dendritic cell activation, migration and polarization in the skin.
6693	DEFB103B	9606	23133681	DEFB103B (hBD3) is induced in leprosy type 1 reactions in keratinocytes.
6693	DEFB103B	9606	25847963	Exposure to ambient air pollution particulate matter deregulates the ability of the human type II alveolar epithelial cells (A549) to express the antimicrobial peptides HBD-2 (DEFB4A/DEFB4B) and HBD-3 (DEFB103A/DEFB103B) upon infection with Mycobacterium tuberculosis and increases intracellular M. tuberculosis growth.
6300	DEFB103A	9606	20385753	DEFB103A inhibits cell wall biosynthesis in staphylococci by inhibiting those enzymes which use the bactoprenol bound cell wall building block Lipid II as substrate.
6300	DEFB103A	9606	20483750	DEFB103A is a beta-defensin with direct antimicrobial properties that contribute to local innate immune responses and it aids in combating microbial invasion by being chemotactic for a broad spectrum of leukocytes in a CCR6- and CCR2-dependent manner.
6300	DEFB103A	9606	21442129	DEFB103A expression is inhibited in human epidermal keratinocytes under high glucose conditions, which in turn contributed to the frequent occurrences of infection associated with diabetic wounds.
6300	DEFB103A	9606	22922323	DEFB103A (hBD-3) is sequestered by extracellular DNA in Haemophilus influenzae biofilms to reduce its antimicrobial activity.
6300	DEFB103A	9606	22951718	DEFB103A (hBD3) induces dendritic cell activation, migration and polarization in the skin.
6300	DEFB103A	9606	23133681	DEFB103A (hBD3) is induced in leprosy type 1 reactions in keratinocytes.
6300	DEFB103A	9606	25637949	DEFB103A and RNASE7 are induced in human umbilical endothelial cells (HUVECs) by classical inflammatory cytokines such as: IFNG, IL1B and TNF.
6300	DEFB103A	9606	25847963	Exposure to ambient air pollution particulate matter deregulates the ability of the human type II alveolar epithelial cells (A549) to express the antimicrobial peptides HBD-2 (DEFB4A/DEFB4B) and HBD-3 (DEFB103A/DEFB103B) upon infection with Mycobacterium tuberculosis and increases intracellular M. tuberculosis growth.
6283	DEFB4B	9606	25847963	Exposure to ambient air pollution particulate matter deregulates the ability of the human type II alveolar epithelial cells (A549) to express the antimicrobial peptides HBD-2 (DEFB4A/DEFB4B) and HBD-3 (DEFB103A/DEFB103B) upon infection with Mycobacterium tuberculosis and increases intracellular M. tuberculosis growth.
6711	DEFB4	9606	20483750	DEFB4 is a beta-defensin with direct antimicrobial properties that contribute to local innate immune responses and it aids in combating microbial invasion by being chemotactic for a broad spectrum of leukocytes in a CCR6- and CCR2-dependent manner.
6711	DEFB4	9606	22427634	DEFB4A is upregulated in hypoxic microenvironments, which is characteristic of infected tissue.
6711	DEFB4	9606	22500651	DEFB4A induction in keratinocytes is inhibited by Pseudomonas aeruginosa rhamnolipids.
6711	DEFB4	9606	25510212	In alveolar epithelium, IL22 upregulates DEFB4A gene expression via STAT3.
6711	DEFB4	9606	25847963	Exposure to ambient air pollution particulate matter deregulates the ability of the human type II alveolar epithelial cells (A549) to express the antimicrobial peptides HBD-2 (DEFB4A/DEFB4B) and HBD-3 (DEFB103A/DEFB103B) upon infection with Mycobacterium tuberculosis and increases intracellular M. tuberculosis growth.
158983	Mapk14	10090	21683629	Mapk14 activation is blocked by Bacillus anthracis, resulting in the opening of a connexin ATP release channel and induction of macrophage death. Constitutive activation of Mapk14 interferes with inflammasome activation and Il1b production, which compromises antimicrobial immunity.
158983	Mapk14	10090	21733175	The Mapk14 pathway is an important contributor to microglial production of proinflammatory cytokines induced by LPS or beta-amyloid.
158983	Mapk14	10090	22028692	Mapk14 mediates cytoskeletal remodelling and early spreading of lipopolysaccharide (LPS)-stimulated macrophages.
158983	Mapk14	10090	22447027	Mapk1 (ERK) and Mapk14 (p38) control the dynamic balance regulating neutrophil migration. (Demonstrated in human)
158983	Mapk14	10090	25783839	Lysophosphatidic acid plays an anti-inflammatory role in macrophages by diminishing lipopolysaccharide-induced phosphorylation of Mapk14 and Akt1, as well as Rela nuclear translocation.
158983	Mapk14	10090	25848864	Treml4 is an essential positive regulator of Tlr7 signalling. Treml4(-/-) macrophages are hyporesponsive to Tlr7 agonists and fail to produce type I interferons due to impaired phosphorylation of Stat1 by Mapk14 and decreased recruitment of Myd88 to Tlr7.
189814	Treml4	10090	25848864	Treml4 is an essential positive regulator of Tlr7 signalling. Treml4(-/-) macrophages are hyporesponsive to Tlr7 agonists and fail to produce type I interferons due to impaired phosphorylation of Stat1 by Mapk14 and decreased recruitment of Myd88 to Tlr7.
44230	TLR7	9606	18071655	TLR7 recognizes long single-stranded RNA and short double-stranded RNA.
44230	TLR7	9606	15034168	TLR7 recognizes the single-stranded RNA viruses, vesicular stomatitis virus and influenza virus, resulting in activation of co-stimulatory molecules and production of cytokines.
44230	TLR7	9606	14976261	TLR7-dependent production of inflammatory cytokines can be induced by single-stranded RNA (ssRNA) molecules of non-viral origin.
44230	TLR7	9606	14579267	TLR7, 8 and 9 form a functional subgroup within the TLR family that recognizes pathogen-associated molecular patterns in endosomal/lysosomal compartments.
44230	TLR7	9606	20034855	TLR7/9-mediated innate immune responses via selected TLR pathways can be negatively regulated by a human microsatellite DNA-mimicking oligodeoxynucleotide with CCT repeats.
44230	TLR7	9606	20007807	TLR7-dependent innate immune response is induced by free human T-cell leukemia virus 1 (HTLV-1) in killer plasmacytoid dendritic cells, resulting in high production of IFN-alpha and TRAIL relocalization.
44230	TLR7	9606	21037581	TLR7 is expressed in C-fiber primary sensory neurons and is important for inducing itch (pruritus), but is not necessary for eliciting mechanical, thermal, inflammatory and neuropathic pain. (Demonstrated in murine model)
44230	TLR7	9606	21282509	TLR7 signalling pathway plays a pivotal role in fungal pathogen recognition and is essential for the subsequent IFNB signalling. (Demonstrated in murine model)
44230	TLR7	9606	21402738	TLR7 requires proteolytic processing in endolysosome by asparagine endopeptidase and cathepsin in the endolysosome to initiate signalling. (Demonstrated in murine model)
44230	TLR7	9606	21487111	TLR7 agonists, such as imidazoquinolines, accumulate in the MHC class II loading compartment - this pH-dependent localization is required for the activation of plasmacytoid dendritic cells.
44230	TLR7	9606	21730058	TLR7 inflammatory signalling leads to cardiac fibrosis in autoimmune associated congenital heart block.
44230	TLR7	9606	21734241	TLR7 and TLR8 are translocated from the endoplasmic reticulum to the endosome in the presence of antiphospholipid antibodies, as a consequence, plasmacytoid dendritic cells become dramatically sensitized to TLR7/8 agonists and this may play a role in systemic autoimmunity.
44230	TLR7	9606	21998589	TLR7 is responsible for the detection of retroviruses and serves as a key checkpoint controlling the development of germinal center B cells. (Demonstrated in mice)
44230	TLR7	9606	22396599	TLR7 signalling induces autophagy in HIV-infected plasmacytoid dendritic cells; this process is necessary for the induction of IFN-alpha.
44230	TLR7	9606	22952664	Aberrant TLR7 activation induces Epstein-Barr viral protein LMP1 expression, which exacerbates IFN production in lupus patients.
44230	TLR7	9606	26130701	IFN-Î»1 is able to augment TLR-mediated B cell activation, partially attributed to an upregulation of TLR7 expression
69650	SPHK1	9606	20634980	SPHK1 is involved in toll-mediated human beta-defensin 2 (HBD-2) regulation in oral keratinocytes, which also involves the activation of PI3K, AKT, GSK3B (GSK-3beta) and ERK 1/2.
69650	SPHK1	9606	20661259	SPHK1 activation, mediated by TLR4, is found to be critical for the redox-dependent activation of HIF-1alpha and ASK1, as well as for the prevention of LPS-induced activation of caspase 3 and the expression of pro-inflammatory cytokine interleukin-6.
69650	SPHK1	9606	26113114	(S)-methyl 2-(hexanamide)-3-(4-hydroxyphenyl) propanoate (MHP) activates SPHK1, which also stimulates CAMP production and enhances epidermal antimicrobial defence.
153059	Peli1	10090	26131354	Peli1 is an innate immune regulator in the central nervous system that modulates the threshold of Type I interferon responses against viral infections.
94882	FCN3	9606	20375620	FCN3, as well as ficolins FCN1 and FCN2, in serum are associated with MBL-associated serine protease (MASP) to form a complex and this complex binds to carbohydrates present on the surface of a variety of Gram-positive and Gram-negative bacteria through ficolin, initiating complement activation via the lectin pathway.
94882	FCN3	9606	26133042	H-Ficolin (FCN3), an innate immune opsonin, participates in Aspergillus fumigatus defence through the activation of the lectin complement pathway, enhancement of fungus-host interactions and modulation of immune responses.
168471	Icosl	9606	26092469	Group 2 innate lymphoid cell (ILC2)-intrinsic Il33 signalling and Icosl expression promote regulatory T cell accumulation, whereas the inflammatory cytokine Ifng counter-regulated the effects of Il33, in part through direct effects on ILC2s.
194305	Smpdl3b	9606	26095358	The membrane-modulating enzyme SMPDL3B is a negative regulator of TLR signalling that functions at the interface of membrane biology and innate immunity.
205243	Ctnnb1	9606	26100021	Glycogen synthase kinase 3/Ctnnb1 (Î²-catenin) axis is required for optimal induction of antiviral innate immunity.
156635	Gsk3a	9606	26100021	Glycogen synthase kinase 3/Ctnnb1 (Î²-catenin) axis is required for optimal induction of antiviral innate immunity.
159859	Gsk3b	10090	21515258	Gsk3b is a regulator of LPS-mediated septic shock. Gsk3b deficiency results in the attenuation of endotoxemia.
159859	Gsk3b	10090	22218715	Gsk3b functions downstream of Tlr2-stimulation to induce the expression of the monocyte chemoattractant protein 1, Ccl2.
159859	Gsk3b	10090	26100021	Glycogen synthase kinase 3/Ctnnb1 (Î²-catenin) axis is required for optimal induction of antiviral innate immunity.
27347	CTNNB1	9606	17704137	CTNNB1 binds to NFKB1 and regulates expression of C-Reactive protein (CRP) after TNF (TNF-alpha) treatment.
27347	CTNNB1	9606	20453844	CTNNB1 interacts with LRRFIP1, promoting the activation of CTNNB1, which increases IFN-beta expression by binding to the C-terminal domain of the transcription factor IRF3 and recruiting the acetyltransferase EP300 to the IFN-beta enhanceosome via IRF3.
27347	CTNNB1	9606	23785285	Stabilization of CTNNB1 upon virus infection negatively regulates antiviral innate immunity.
27347	CTNNB1	9606	26100021	Glycogen synthase kinase 3/CTNNB1 (Î²-catenin) axis is required for optimal induction of antiviral innate immunity.
51663	GSK3B	9606	17912008	GSK3B is a cytoplasmic serine/threonine protein kinase that regulates NF-kappaB activation and the proliferation and survival of pancreatic cancer cells.
51663	GSK3B	9606	17726008	GSK3B inhibits MEKK4 activity and prevents its activation of JNK and p38, thus controlling MEKK4 dimerization both positively and negatively by regulating its interaction with specific proteins.
51663	GSK3B	9606	20497256	GSK3B activation is accelerated by TLR4 which leads to deterioration of serum-deprivation-induced apoptosis and beta-arrestin 2 represents an inhibitory effect on the TLR4-mediated apoptotic cascade, through controlling the homeostasis of activation and inactivation of GSK3B.
51663	GSK3B	9606	21515258	GSK3B is a regulator of LPS-mediated septic shock. GSK3B deficiency results in the attenuation of endotoxemia. (Demonstrated in murine model)
51663	GSK3B	9606	22218715	GSK3B functions downstream of TLR2-stimulation to induce the expression of the monocyte chemoattractant protein 1, CCL2. (Demonstrated in mice)
51663	GSK3B	9606	26100021	Glycogen synthase kinase 3/CTNNB1 (Î²-catenin) axis is required for optimal induction of antiviral innate immunity.
53956	GSK3A	9606	26100021	Glycogen synthase kinase 3/CTNNB1 (Î²-catenin) axis is required for optimal induction of antiviral innate immunity.
44288	TLR8	9606	18985539	TLR8 expression and function is highly up-regulated in colonic epithelium from patients with active inflammatory bowel disease (IBD), suggesting that TLR8 signalling is important in the pathogenesis of IBD.
44288	TLR8	9606	14579267	Toll-like receptor 8 (TLR8), 7 and 9 form a functional subgroup within the TLR family that recognizes pathogen-associated molecular patterns in endosomal/lysosomal compartments.
44288	TLR8	9606	14976262	TLR8 and TLR7 bind single-stranded RNA, stimulating dendritic cells (DCs) and macrophages to secrete interferon-alpha and pro-inflammatory, as well as regulatory, cytokines.
44288	TLR8	9606	17264163	TLR8 signalling strongly promotes inflammatory lipid mediator biosynthesis, providing novel insights on innate immune response to viral infections.
44288	TLR8	9606	20652908	TLR8 is activated in human monocytic cells following Helicobacter pylori phagocytosis and TLR8 single nucleotide polymorphism play a role in the modulation of TLR8-dependent microbicidal response of infected macrophages.
44288	TLR8	9606	21734241	TLR7 and TLR8 are translocated from the endoplasmic reticulum to the endosome in the presence of antiphospholipid antibodies, as a consequence, plasmacytoid dendritic cells become dramatically sensitized to TLR7/8 agonists and this may play a role in systemic autoimmunity.
44288	TLR8	9606	22393042	TLR8 binding of HIV ssRNA induces endosomal acidification and chromatin remodeling at the TNF-alpha promoter to promote TNF-alpha release in infected macrophages.
44288	TLR8	9606	22753494	TLR8 binds to exosomal MIR21 and MIR29A secreted by tumour cells and initiates a prometastatic inflammatory response.
44288	TLR8	9606	24277153	TLR8 plays a pathogenic role in disease whereby its expression is increased in patients with systemic arthritis and is correlated with the elevation of IL1B levels and disease status.
44288	TLR8	9606	25599397	TLR8 binds degradation products of single-stranded RNA at two distinct sites. One site prefers uridine mononucleosides and the other site prefers short oligonucleotides.
44288	TLR8	9606	26101323	TLR8-dependent detection of bacterial RNA is critical for triggering monocyte activation in response to infection with Streptococcus pyogenes.
21151	UBE2V2	9606	26101372	TRIM5 requires UBE2W, UBE2N and UBE2V2 enzymatic activities to inhibit retroviral DNA synthesis
51220	UBE2N	9606	16862162	UBE2N abalation resulted in defective B cell development and in impaired B cell and macrophage activation.
51220	UBE2N	9606	26101372	TRIM5 requires UBE2W, UBE2N and UBE2V2 enzymatic activities to inhibit retroviral DNA synthesis
25727	UBE2W	9606	26101372	TRIM5 requires UBE2W, UBE2N and UBE2V2 enzymatic activities to inhibit retroviral DNA synthesis
27690	TRIM5	9606	21131187	TRIM5 is upregulated by Type I and Type II interferons and have been found to restrict viral replication by modulating the RIG-I pathway.
27690	TRIM5	9606	21734563	TRIM5 is an innate intracellular HIV restriction factor that is upregulated by type I interferons.
27690	TRIM5	9606	23438823	TRIM5 was identified in a systematic screen for positive regulators of innate immune responses.
27690	TRIM5	9606	26101372	TRIM5 requires UBE2W, UBE2N and UBE2V2 enzymatic activities to inhibit retroviral DNA synthesis
58353	OAS3	9606	21190483	OAS3 is a pathogen recognition receptor for the viral pathogen-associated molecular pattern, double-stranded RNA. Upon recognition of dsRNA, the OAS3 activates RNASEL to cleave ssRNA. The OAS/RNASEL pathway triggers the RIG-I pathway and induce IFNB production.
58353	OAS3	9606	26063222	Antiviral activity of the 2â²,5â²-oligoadenylate synthetase (OAS) gene variants against dengue virus shows strong and serotype-specific disparities.
58231	OAS1	9606	21190483	OAS1 is a pathogen recognition receptor for the viral pathogen-associated molecular pattern, double-stranded RNA. Upon recognition of dsRNA, the OAS1 activates RNASEL to cleave ssRNA. The OAS/RNASEL pathway triggers the RIG-I pathway and induce IFNB production.
58231	OAS1	9606	23319625	OAS1 is a cytoplasmic dsRNA sensor.
58231	OAS1	9606	26063222	Antiviral activity of the 2â²,5â²-oligoadenylate synthetase (OAS) gene variants against dengue virus shows strong and serotype-specific disparities.
210514	Pycard	10090	21439959	Pycard is a component of the inflammasome and is required for inflammation in acute pancreatitis.
210514	Pycard	10090	22295065	Nlrp3/Pycard inflammasome activation following human respiratory syncytial virus infection is dependent on the activation of Tlr2/Myd88/NF-kB and reactive oxygen species/potassium efflux. (Demonstrated in human)
210514	Pycard	10090	23302887	PYCARD is an essential regulator of inflammatory responses in West Nile virus encephalitis.
210514	Pycard	10090	24185614	Phosphorylation of the inflammasome adaptor Pycard (ASC) controls inflammasome activity through the formation of ASC specks. The NLRP3 and AIM2 inflammasomes require Syk and Mapk8 (JNK) for their full activity .
210514	Pycard	10090	25689249	Activation of the Nlrp3 inflammasome is detrimental during leishmaniasis. Mice lacking the inflammasome components Nlrp3, Pycard, Casp1 exhibit defective Il1b and Il18 production at the infection site and are resistant to cutaneous Leishmania major infection.
210514	Pycard	10090	26071556	Mice lacking Pycard display attenuated pulmonary hypertension and right ventricle remodelling in response to hypoxia and this is accompanied by blunted inflammasome activation.
207109	Psen2	9606	26081153	Psen2 deficiency is paralleled by reduced transcription of Tlr4 mRNA and loss of LPS-induced Tlr4 mRNA transcription regulation.
196306	Stmn1	9606	26082487	Stmn1 overexpression impacts microtubule stability, impairs cell spreading, reduces activation-associated phenotypes andreduces complement receptor 3 (CR3)-mediated phagocytosis and cellular activation.
94374	MAP3K7	9606	10187861	MAP3K7 (TAK1) is a member of the mitogen-activated protein kinase kinase kinase family that, together with its activator TAK1-binding protein 1 (TAB1), activates the IKK signallosome and thus regulates NF-kappaB activation.
94374	MAP3K7	9606	17965022	MAP3K7 is an essential intermediate of NOD2 signalling where MAP3K7 deletion completely abolishes muramyl dipeptide (MDP)-NOD2 signalling, activation of NF-kappaB and MAPKs, and the subsequent induction of cytokines/chemokines in keratinocytes.
94374	MAP3K7	9606	10675530	MAP3K7 mediates the activation signal from TLRs to nuclear factor-kappaB in lipopolysaccharide-stimulated macrophages.
94374	MAP3K7	9606	16260493	MAP3K7 acts as an upstream activating kinase for IKBKB (IKK-beta) and MAPK8 (JNK), but not CHUK (IKK-alpha), revealing a specific role of MAP3K7 in inflammatory signalling pathways.
94374	MAP3K7	9606	8533096	MAP3K7 (TAK1) functions as a mediator in the signalling pathway of TGF-beta superfamily members.
94374	MAP3K7	9606	9480845	MAP3K7 induces NF-kappaB activation through a MAP3K14 (NIK)-independent signalling pathway.
94374	MAP3K7	9606	10094049	MAP3K7 links TRAF6 to the MAP3K14 (NIK)-IKK cascade in the IL-1 signalling pathway where activated MAP3K7 phosphorylates NIK, which stimulates IKK-alpha activity.
94374	MAP3K7	9606	20065289	MAP3K7 is a target for glucocorticoids that integrates their anti-inflammatory action in innate immunity signalling pathways.
94374	MAP3K7	9606	20200282	MAP3K7 plays a central role in controlling nuclear and cytoplasmic signalling cascades in primary neutrophils where it constitutively associates with the IKBKB (I-kappa-B kinase) complex in the nucleus and cytoplasm, impacting downstream signalling processes.
94374	MAP3K7	9606	21220427	MAP3K7 activation is impaired during endotoxin tolerization; a process which impairs the production of LPS-induced pro-inflammatory cytokines without inhibition expression of anti-inflammatory or anti-microbial mediators.
94374	MAP3K7	9606	22069318	MAP3K7 polyubiquitination is essential for the activation of NF-kB signalling downstream of TNF receptor, IL1 receptor and TLR4.
94374	MAP3K7	9606	22843747	MAP3K7 is necessary for the neutrophil priming effect of leukotriene B (4) to enhance TLR stimulation. (Demonstrated in mice)
94374	MAP3K7	9606	25028512	MAP3K7 (TAK1) Ser412 phosphorylation is regulated by PRKACA and PRKX, and is essential for proper signalling, as well as proinflammatory cytokine induction by TLR/IL-1R activation.
94374	MAP3K7	9606	25371197	ECSIT binds to MAP3K7 and TRAF6 to form a complex that plays a pivotal role in activating TLR4-mediated NF-kB signalling.
94374	MAP3K7	9606	26082489	Endotoxin tolerance re-programs TLR4 signalling via suppression of PELI1, a positive regulator of MyD88- and TIR domain-containing adapter inducing IFN-Î² (TRIF)-dependent signalling that promotes K63-linked polyubiquitination of IRAK1, TBK1, and TAK1.
90782	IRAK1	9606	18276832	IRAK1 plays an essential role in Toll-like receptor/interleukin-1 receptor (TLR/IL-1R) -associated NF-kappaB activation through its involvement in IKK activation, which then leads to subsequent IkappaB degradation and NF-kappaB nuclear translocation and both cytosolic and nuclear actions of IRAK1 participate in the activation of NF-kappaB-dependent transcriptional events.
90782	IRAK1	9606	17997719	IRAK1 and IRAK4 play key roles in a signalling pathway by which bacterial infection or interleukin-1 (IL1) trigger the production of inflammatory mediators. Pellino isoforms are the E3 ubiquitin ligases that mediate the IL1-stimulated formation of K63-pUb-IRAK1 in cells, which contribute to the activation of IKBKB and NF-kappaB, as well as other signalling pathways dependent on IRAK1 and IRAK4.
90782	IRAK1	9606	10224059	IRAK1 is a component of a novel signal transduction pathway through which TNF receptor activates NF-kappaB-dependent gene expression.
90782	IRAK1	9606	9625767	IRAK1 plays an essential proximal role in coordinating multiple IL1 signalling pathways for optimal induction of cellular responses.
90782	IRAK1	9606	20044140	IRAK1 functionally associates with PKC-epsilon and VASP in the regulation of macrophage migration.
90782	IRAK1	9606	21057262	IRAK1 and MYD88 autosomal recessive deficiencies impair Toll-like receptor (TLR)- and interleukin-1 receptor-mediated immunity and predispose patients to recurrent life-threatening bacterial diseases, such as invasive pneumococcal disease in particular, in infancy and early childhood, with weak signs of inflammation.
90782	IRAK1	9606	21220427	IRAK1 is polyubiquitinated and disassembled during endotoxin tolerization; a process which impairs the production of LPS-induced pro-inflammatory cytokines without inhibition expression of anti-inflammatory or anti-microbial mediators.
90782	IRAK1	9606	22033459	IRAK1 mediates the proteasome-dependent degradation of TRAF6 and acts as a negative regulator of TLR-signalling. (Demonstrated in mice)
90782	IRAK1	9606	23143987	IRAK1 accumulation triggers ischemia-induced inflammation in the small intestine.
90782	IRAK1	9606	24670381	MIR146A is a potent negative regulator of the innate immune response in keratinocytes through downregulation of the IRAK1/TRAF6/NFÎºB pathway.
90782	IRAK1	9606	26082489	Endotoxin tolerance re-programs TLR4 signalling via suppression of PELI1, a positive regulator of MyD88- and TIR domain-containing adapter inducing IFN-Î² (TRIF)-dependent signalling that promotes K63-linked polyubiquitination of IRAK1, TBK1, and TAK1.
25713	MYD88	9606	11976320	MYD88 is a Toll/IL-1R homology (TIR) domain containing adaptor which recruits IRAK1 possibly through IRAK4.
25713	MYD88	9606	18327267	MYD88 can interact with bacterial TIR domain containing-proteins (Tcps) identified in Escherichia coli CFT073 (TcpC) and Brucella melitensis (TcpB) and interfere with MYD88-dependent pathway, thus suppressing innate immunity and increasing virulence.
25713	MYD88	9606	16354686	MYD88 binding with interleukin-1 (IL-1) receptor (IL1R1) is required for inducing endocytosis of IL1R1 following ligand binding.
25713	MYD88	9606	9734363	MYD88 is a key adaptor/regulator molecule for the Toll/IL-1R family of receptors for innate immunity.
25713	MYD88	9606	9430229	MYD88 interacts with the IL-1 receptor and blocks NF-kappaB activation induced by IL-1, but not by TNF.
25713	MYD88	9606	20167866	TLR-2/MyD88/PI3K/Rac1/Akt pathway mediates LTA-induced MAPKs activation, which in turn initiates the activation of NF-kappaB, and ultimately induces cPLA2/COX-2-dependent PGE2 and IL-6 generation.
25713	MYD88	9606	20519121	MYD88 plays a critical role in reverse cholesterol transport in vitro and in vivo, in part through promoting ATP-binding cassette A1 transporter upregulation, coupling cholesterol trafficking to inflammation through MYD88 and identifying innate immunity as a physiologic signal in cholesterol homeostasis.
25713	MYD88	9606	21057262	MYD88 and IRAK1 autosomal recessive deficiencies impair Toll-like receptor (TLR)- and interleukin-1 receptor-mediated immunity and predispose patients to recurrent life-threatening bacterial diseases, such as invasive pneumococcal disease in particular, in infancy and early childhood, with weak signs of inflammation.
25713	MYD88	9606	21248248	MYD88 is essential in restricting TLR3 signalling and the host protection from unwanted immunopathologies associated with excessive production of IFNB1. MYD88 inhibits TLR3 signalling by impairing IKBKE-mediated induction of IRF3, and consequently the expression IFNB1 and CCL5.
25713	MYD88	9606	21283748	MYD88 is activated by MHC class II in response to staphylococcal enterotoxins and is crucial for the induction of pro-inflammatory cytokines.
25713	MYD88	9606	21325272	MYD88 is a key signalling adapter in TLR signalling. MYD88 aggregates in the cell as distinct foci and co-localizes with IRAK4 in these Myddosomes - the formation of which is required for MYD88 function.
25713	MYD88	9606	21353603	MYD88 is required in dendritic cells stimulated with TLR9 ligand for the enhancement of T cell-dependent antibody response. In addition, MYD88 is required in B cells to facilitate strong anti-viral antibody responses. (Demonstrated in murine model)
25713	MYD88	9606	21422180	MYD88 deficient macrophages displayed impaired interaction with fungal yeast cells and produced low levels of pro-inflammatory cytokines. MYD88 signalling is important in the activation of fungicidal mechanisms and the induction of protective innate immune responses against P. brasiliensis. (Demonstrated in murine model)
25713	MYD88	9606	22028692	MYD88 mediates cytoskeletal remodelling and late spreading of lipopolysaccharide (LPS)-stimulated macrophages. (Demonstrated in mice)
25713	MYD88	9606	22025508	MYD88-dependent recruitment of inflammatory monocytes and dendritic cells to the lungs are key initial cellular responses required for early protection from Burkholderia mallei infection. (Demonstrated in mice)
25713	MYD88	9606	22386951	MYD88 deficiency results in delayed recruitment of phagocytes and defective production of proinflammatory cytokines in response to Salmonella infection. (Demonstrated in mice)
25713	MYD88	9606	22491177	MYD88 signalling in intestinal epithelial cells is crucial for the maintenance of gut microbiota homeostasis. (Demonstrated in mice)
25713	MYD88	9606	22536449	MYD88 mediated production of reactive oxygen species (ROS) is essential for the induction of IL12 by lactic acid bacteria. (Demonstrated in mice)
25713	MYD88	9606	24670424	Following NOD2 activation, IRF4 interacts with MYD88, TRAF6, and RIPK2 and downregulates K63-linked polyubiquitinylation of RICK and TRAF6 leading to disruption of NFkB activation pathways.
25713	MYD88	9606	26082489	Endotoxin tolerance re-programs TLR4 signalling via suppression of PELI1, a positive regulator of MyD88- and TIR domain-containing adapter inducing IFN-Î² (TRIF)-dependent signalling that promotes K63-linked polyubiquitination of IRAK1, TBK1, and TAK1.
53855	PELI1	9606	19734906	PELI1 is a ubiquitin ligase that facilitates TRIF-dependent Toll-like receptor signalling and pro-inflammatory cytokine production.
53855	PELI1	9606	17997719	PELI1 (pellino) isoforms are E3 ubiquitin ligases that mediate the IL-1-stimulated formation of K63-pUb-IRAK1 in cells, contributing to the activation of IKBKB and NF-kappaB, as well as other signalling pathways dependent on IRAK1 and IRAK4.
53855	PELI1	9606	20171181	Discrete regions of PELI1 are bound by SMAD6 and SMAD7 via their MH2 domains to mediate TGF-beta1-induced negative regulation of IL-1R/TLR signalling.
53855	PELI1	9606	21120624	PELI1 is an adaptor protein involved in IL1R/TLR signaling. PELI1 is sumoylated by SUMO1at 5 lysine residues, and binds to the SUMO-conjugating enzyme UBE2I.
53855	PELI1	9606	26082489	Endotoxin tolerance re-programs TLR4 signalling via suppression of PELI1, a positive regulator of MyD88- and TIR domain-containing adapter inducing IFN-Î² (TRIF)-dependent signalling that promotes K63-linked polyubiquitination of IRAK1, TBK1, and TAK1.
34438	TIFA	9606	26068852	Bacterial-derived monosaccharide heptose-1,7-bisphosphate (HBP) is a pathogen-associated molecular pattern (PAMP) that activates TIFA-dependent immunity to Gram-negative bacteria
181478	Rora	10090	22267218	The transcription factor Rora is critical for the development of nuocytes and the mounting of innate type 2 immunity against parasitic worms.
181478	Rora	10090	26045547	Nlrp3 is a novel molecular target for melatonin which requires Rora to blunt the NFkB/ NLRP3 connection during sepsis.
154747	Irak1	10090	21220427	Irak1 is polyubiquitinated and disassembled during endotoxin tolerization; a process which impairs the production of LPS-induced pro-inflammatory cytokines without inhibition expression of anti-inflammatory or anti-microbial mediators.
154747	Irak1	10090	22033459	Irak1 mediates the proteasome-dependent degradation of Traf6 and acts as a negative regulator of TLR-signalling.
154747	Irak1	10090	23143987	IRAK1 accumulation triggers ischemia-induced inflammation in the small intestine.
154747	Irak1	10090	26048146	Mir146 attenuates sepsis-induced cardiac dysfunction by preventing NFÎºB activation, inflammatory cell infiltration, and inflammatory cytokine production via targeting of Irak1 and Traf6 in both cardiomyocytes and inflammatory monocytic cells
36786	IFRD1	9606	26055519	Human papillomaviruses impair the acetylation of NFÎºB/RelA K310 in keratinocytes by augmenting the expression of interferon-related developmental regulator 1 (IFRD1) in an EGFR-dependent manner.
16933	EGFR	9606	11470832	EGFR is the receptor for epidermal growth factor (EGF) and signalling through growth factor receptors controls diverse cell functions such as proliferation, migration, and differentiation.
16933	EGFR	9606	15284024	EGFR-induced cell migration is mediated predominantly by the JAK-STAT pathway in primary esophageal keratinocytes.
16933	EGFR	9606	18772136	EGFR and TLR4 are activated by neutrophil elastase (ELA2) to produce IL8 through a novel metalloprotease pathway.
16933	EGFR	9606	26055519	Human papillomaviruses impair the acetylation of NFÎºB/RelA K310 in keratinocytes by augmenting the expression of interferon-related developmental regulator 1 (IFRD1) in an EGFR-dependent manner.
41300	PDE12	9606	26055709	PDE12 negatively regulates the innate immune response and inhibitors of PDE12 show increased IFN induced 2â,5â- oligoadenylate and antiviral activities.
408826	LYN	9606	20385881	The LYN/PI3K module negatively regulates activation of murine macrophages while Inpp5d (SHIP-1) promotes it.
408826	LYN	9606	22491248	Overexpression of LYN results in endotoxin hypersensitivity due to the increased activation of dendritic cells leading to an over-production of IFNG by natural killer cells. (Demonstrated in mice)
408826	LYN	9606	26055819	LYN-dependent phosphorylation of the p110 catalytic subunit of PI 3-kinase is essential to the control of PI 3-kinase biological activity upstream of AKT and thereby to the transactivation of NFÎºB.
92358	MB21D1	9606	23707061	MB21D1 (cGAS) is a cytosolic DNA sensor and is required for the induction of the interferon response.
92358	MB21D1	9606	24284630	Cytosolic DNA sensor cyclic GMP-AMP synthase (cGAS, also known as MB21D1) is pivotal in protecting the host from both DNA and RNA viruses
92358	MB21D1	9606	24269171	Cytosolic DNA sensor cGAS (MB21D1) is essential in human dentritic cells for innate sensing of HIV-1 and HIV-2.
92358	MB21D1	9606	25425575	Cytosolic RNA:DNA hybrids are sensed by the MB21D1-TMEM173 (cGAS-STING) pathway of the innate immune system.
92358	MB21D1	9606	25831530	IFI16 and MB21D1 interact and cooperate during herpes simplex virus infection to initiate innate signalling.
92358	MB21D1	9606	26046437	PQBP1 directly binds to reverse-transcribed HIV-1 DNA and interacts with MB21D1 to initiate an IRF3-dependent innate response.
64349	PQBP1	9606	26046437	PQBP1 directly binds to reverse-transcribed HIV-1 DNA and interacts with MB21D1 to initiate an IRF3-dependent innate response.
300259	TNF	9606	16199883	TNF (TNF-alpha) is an important mediator of inflammation, apoptosis, and the development of secondary lymphoid structures and LRRFIP1 represses TNF expression.
300259	TNF	9606	21602809	TNF pre-treated macrophages exhibit endotoxin tolerance, i.e. less cytokine production, towards LPS challenge. TNF-mediated cross-tolerization is mediated by suppression of LPS-induced signalling and chromatin remodelling.
300259	TNF	9606	21611132	TNF is essential to mount an acute inflammatory response to dsDNA in the endothelium. (Demonstrated in murine model)
300259	TNF	9606	24012417	IFN gamma creates a primed chromatin environment in macrophages to augment TLR-induced TNF transcription
300259	TNF	9606	25005359	Secreted CCNA2 (CCN1) promotes anti-inflammatory cytokine IL10 release from epithelial cells via integrin Î±VÎ²6-PKC, and this subsequently suppresses TNF, CXCL2 and neutrophil infiltration in the lungs.
300259	TNF	9606	25637949	DEFB103A and RNASE7 are induced in human umbilical endothelial cells (HUVECs) by classical inflammatory cytokines such as: IFNG, IL1B and TNF.
2528	RNASE7	9606	25712218	RNASE7 is produced by airway epithelial basal cells in response to cigarette smoke exposure.
2528	RNASE7	9606	25637949	DEFB103A and RNASE7 are induced in human umbilical endothelial cells (HUVECs) by classical inflammatory cytokines such as: IFNG, IL1B and TNF.
103863	AIM2	9606	19158675	AIM2 recognizes cytosolic double stranded DNA and forms a caspase-1-activating inflammasome with PYCARD (ASC).
103863	AIM2	9606	20351693	AIM2 has a critical role in host innate immunity to intracellular pathogens where it is a crucial sensor of F. tularensis infection.
103863	AIM2	9606	20351692	AIM2 inflammasome is essential for host defence against cytosolic bacteria and DNA viruses.
103863	AIM2	9606	20401524	AIM2 is a newly discovered pattern recognition receptor (PRR) involved in the sensing of dangerous cytosolic DNA produced by infection with DNA viruses.
103863	AIM2	9606	20457908	AIM2 is required for innate immune recognition of Francisella tularensis where AIM2-deficient mice display an increased susceptibility to F. tularensis infection compared with wild-type mice.
103863	AIM2	9606	21562230	AIM2-containing inflammasomes are activated in response to cytosolic DNA, Â this response is augmented in keratinocytes from psoriatic lesions and contributes to the auto-inflammatory disease.
103863	AIM2	9606	25641891	Single nucleotide polymorphisms in IFI16 and AIM2 are associated with BehÃ§et disease .
103852	IFI16	9606	20890285	IFI16, a PYHIN protein, is an intracellular DNA sensor that mediates the induction of interferon-beta (IFNB) by directly associating with IFNB-inducing viral DNA motifs.
103852	IFI16	9606	21575908	IFI16 acts as a nuclear pathogen sensor and interacts with PYCARD and CASP1 to form a functional inflammasome during KSHV infections.
103852	IFI16	9606	24131791	Cyclic-di-GMP-induced levels of IFI16 suppress the expression of TMEM173 (STING).
103852	IFI16	9606	24367117	IFI16 is essential for host defence by clustering into signalling foci with foreign DNA in a switch-like manner and is capable of using the size of naked double stranded DNA as a molecular ruler to distinguish self from nonself.
103852	IFI16	9606	24449861	In herpes simplex virus 1 (HSV-1) infected cells, the stability and function of IFI16 and TMEM173 are dependent on cell derivation and the functional integrity of HSV-1 proteins ICP0 and US3 protein kinase.
103852	IFI16	9606	24154727	IFI16 is a sensor for lentiviral reverse transcription products and restricts HIV-1 replication in macrophages.
103852	IFI16	9606	24237704	IFI16 oligomerizes upon viral DNA sensing in human cytomegalovirus (HCMV) infected-cells. The HCMV major tegument protein pUL83 blocks nuclear IFI16 oligomerization and inhibits IFI16-mediated antiviral cytokine expression
103852	IFI16	9606	24449861	The end result of the interplay between TMEM173 (STING), IFI16, and herpes simplex virus 1 (HSV-1) is determined by the genotype of the infected cells and the functional integrity of HSV-1 proteins infected cell protein 0 (ICP0) and US3 protein kinase.
103852	IFI16	9606	24154727	IFI16 is a sensor for lentiviral reverse transcription products and restricts HIV-1 replication in human macrophages.
103852	IFI16	9606	25002588	IFI16 transcriptionally regulates type-I interferons and DDX58 (RIG-I) and controls the interferon response to both DNA and RNA viruses.
103852	IFI16	9606	25831530	IFI16 and MB21D1 interact and cooperate during herpes simplex virus infection to initiate innate signalling.
103852	IFI16	9606	25972554	IFI16 restricts chromatinized human papillomaviruses DNA through epigenetic modifications, thus reducing both viral replication and transcription.
103852	IFI16	9606	25641891	Single nucleotide polymorphisms in IFI16 and AIM2 are associated with BehÃ§et disease.
73479	MAPK8	9606	19153595	MAPK8 phosphorylates IRF3 and is essential for IRF3 dimerization induced by polyinosinic-cytidylic acid (polyI:C).
73479	MAPK8	9606	25642820	Mycobacterium tuberculosis phosphatase PtpA suppresses innate immunity by binding to ubiquitin; which, in turn, activates it to dephosphorylate phosphorylated MAPK8 and MAPK14.
84613	MAPK14	9606	15569672	MAPK14 is dephosphorylated by PPP2R4, which then induces apoptosis in neutrophils and the resolution of inflammation.
84613	MAPK14	9606	21683629	MAPK14 activation is blocked by Bacillus anthracis, resulting in the opening of a connexin ATP release channel and induction of macrophage death. Constitutive activation of MAPK14 interferes with inflammasome activation and IL1B production, which compromises antimicrobial immunity. (Demonstrated in murine model)
84613	MAPK14	9606	21733175	The MAPK14 pathway is an important contributor to microglial production of proinflammatory cytokines induced by LPS or beta-amyloid. (Demonstrated in mouse)
84613	MAPK14	9606	22028692	MAPK14 mediates cytoskeletal remodelling and early spreading of lipopolysaccharide (LPS)-stimulated macrophages. (Demonstrated in mice)
84613	MAPK14	9606	22447027	MAPK1 (ERK) and MAPK14 (p38) control the dynamic balance regulating neutrophil migration.
84613	MAPK14	9606	25642820	Mycobacterium tuberculosis phosphatase PtpA suppresses innate immunity by binding to ubiquitin; which, in turn, activates it to dephosphorylate phosphorylated MAPK8 and MAPK14.
158878	Pten	10090	25646418	Pten is an essential regulator of natural killer cell localization in vivo during both homeostasis and malignancy.
135792	Tnfaip3	10090	21220427	Tnfaip3 expression and Tnfaip3-Irak1interaction are important for endotoxin tolerance. Tnfaip3 overexpression inhibits LPS-induced activation of NFKB, and is mechanistically linked to endotoxin tolerance through the reprogramming of Tlr4 signaling.
135792	Tnfaip3	10090	22031828	Tnfaip3 promotes intestinal epithelial barrier integrity and inhibits LPS-induced loss of the tight junction protein occludin.
135792	Tnfaip3	10090	24023826	Tnfaip3 is regulated by both Nf-ÎºB and p38-dependent Cebpb in response to LPS in macrophages.
135792	Tnfaip3	10090	25683052	Mirlet7f and its target Tnfaip3 regulate immune responses to Mycobacterium tuberculosis and control bacterial burden by augmenting the production of Tnf and Il1b.
135792	Tnfaip3	10090	25609235	Sqstm1 captures Tnfaip3, an NFkB inhibitor, and sequesters it in the autophagosome. This allows macrophages to release chemokines that recruit neutrophils and boost antifungal immunity.
168358	Sqstm1	10090	21220332	Sqstm1 is required for Tlr4-mediated autophagy. Tlr4-driven induction of Sqstm1 plays an essential role in the formation and the autophagy degradation of aggresome-like induced structures, which might be critical for regulating host defense.
168358	Sqstm1	10090	22901810	Sqstm1 and Calcoco2 are ubiquitin-autophagy receptors that are required for the recognition of extracelluar bacterial DNA by the Tmem173 (STING)-dependent cytosolic pathway, marking bacteria with ubiquitin, and delivery of bacilli to autophagosomes.
168358	Sqstm1	10090	24011591	Phosphorylation of Sqstm1 (p62) activates the Keap1-Nrf2 pathway during selective autophagy.
168358	Sqstm1	10090	25609235	Sqstm1 captures Tnfaip3, an NFkB inhibitor, and sequesters it in the autophagosome. This allows macrophages to release chemokines that recruit neutrophils and boost antifungal immunity.
86629	TREM1	9606	20797396	TREM1 is a superimmunoglobulin receptor present on neutrophils and monocytes, which plays an important role in the amplification of inflammation and its expression is inhibited by PGD(2) and PGJ(2) in macrophages.
86629	TREM1	9606	21393102	TREM1 is an activating receptor expressed on neutrophils and monocytes that amplifies inflammation induced by TLR4-signalling, specifically in the induction of TNFA production.
86629	TREM1	9606	21555403	TREM1 expression is upregulated following Pseudomonas aeruginosa infection in the cornea and the inhibition of TREM1 reduces the severity of corneal disease. TREM1 acts as an inflammatory amplifier in P. aeruginosa keratitis by modulating TLR signalling and Th1/Th2 responses.
86629	TREM1	9606	21690199	TREM1 expression is induced by vitamin D3 in human bronchial epithelial cells. Activation of TREM1 leads to the induction of human beta defensin 2 and TNF-alpha mRNA in the airway epithelium.
86629	TREM1	9606	22459945	TREM1 mediates endotoxin tolerance in monocytes through its ability to induce anti- or pro-inflammatory signals depending on its membrane-bound state.
86629	TREM1	9606	23475790	TREM1 expression and shedding are regulated by CpG-mediated TLR9 activation in macrophages.
86629	TREM1	9606	25595774	PGLYRP1 binds to bacterially derived peptidoglycan and these complexes constitute potent ligands capable of binding to TREM1 and inducing myeloid cell functions.
58413	PGLYRP1	9606	20418257	PGLYRP1 is a secreted innate immunity protein that is expressed in polymorphonuclear leukocytes and is conserved from insects to mammals, it recognizes bacterial peptidoglycan, and functions in antibacterial immunity and inflammation.
58413	PGLYRP1	9606	21134971	PGLYRP1 is a peptidoglycan recognition protein and play a role in innate immunity against L. monocytogenes infection by inducing TNFA. (Demonstrated in murine model)
58413	PGLYRP1	9606	21439073	PGLYRP1 is a member of the Peptidoglycan Recognition Proteins (PGRP) family and recognizes peptidoglycan, a structural component of bacterial cell walls, as a part of innate immune response against infections.
58413	PGLYRP1	9606	21602801	PGLYRP1 binds to Gram-positive bacterial wall and activates a protein-sensing two-component system to induce bacterial death. PLGYRP1-mediated activation results in membrane depolarization and cessation of peptidoglycan, protein, and RNA/DNA synthesis, as well as the production of hydroxyl radicals.
58413	PGLYRP1	9606	25595774	PGLYRP1 binds to bacterially derived peptidoglycan and these complexes constitute potent ligands capable of binding to TREM1 and inducing myeloid cell functions.
136612	Il17f	10090	25595775	Defb1 is important for the control of early mucosal Candida infection and plays a critical role in the induction of innate inflammatory mediators including, Il1b, Il6, Cxcl1, Il17a, and Il17f.
178943	Cxcl1	10090	25595775	Defb1 is important for the control of early mucosal Candida infection and plays a critical role in the induction of innate inflammatory mediators including, Il1b, Il6, Cxcl1, Il17a, and Il17f.
139170	Defb1	10090	21551252	Defb1 is upregulated in plasmacytoid dendritic cells and monocyte during viral challenge Defb1-deficient mice infected with mouse-adapted HK18 (influenza) lost weight earlier and died sooner than WT mice, suggesting that Defb1 plays a role in early innate immune responses against influenza in vivo. However, lung virus titers were equal between the two mouse strains, indicating that the mechanism …
139170	Defb1	10090	22102811	Defb1 is a component of platelets that displays classic antimicrobial activity and signals polymorphonuclear leukocytes to extrude DNA lattices that capture and kill bacteria. (Demonstrated in human)
139170	Defb1	10090	25595775	Defb1 is important for the control of early mucosal Candida infection and plays a critical role in the induction of innate inflammatory mediators including, Il1b, Il6, Cxcl1, Il17a, and Il17f.
175257	Dnase2a	10090	25600358	Dnase2a is required for Tlr9 activation by bacterial genomic DNA.
66320	FPR2	9606	25605714	FPR1 and FPR2 are G-protein-coupled receptors that recognize bacterial signal peptides, constituting a novel class of immune activators that contribute to mammalian immune defence against bacteria.
66270	FPR1	9606	25605714	FPR1 and FPR2 are G-protein-coupled receptors that recognize bacterial signal peptides, constituting a novel class of immune activators that contribute to mammalian immune defence against bacteria.
18954	PPARG	9606	20421464	PPARG functions as an antimicrobial factor by maintaining constitutive epithelial expression of a subset of beta-defensin in the colon.
18954	PPARG	9606	21148557	PPARG negatively regulates IFNB production in TLR3/4-stimulated macrophages by preventing IRF3 binding to the IFN-beta promoter.
18954	PPARG	9606	25595716	MIR130A reduces hepatitis B virus (HBV) replication by down-regulating the expression of two major metabolic regulators PPARGC1A and PPARG, both of which can potently stimulate HBV replication.
11756	PPARGC1A	9606	21966468	PPARGC1A is activated in Staphylococcus aureus-mediated sepsis via the TLR2-signalling pathway. (Demonstrated in mice)
11756	PPARGC1A	9606	25595716	MIR130A reduces hepatitis B virus (HBV) replication by down-regulating the expression of two major metabolic regulators PPARGC1A and PPARG, both of which can potently stimulate HBV replication.
126561	MIR130A	9606	25595716	MIR130A reduces hepatitis B virus (HBV) replication by down-regulating the expression of two major metabolic regulators PPARGC1A and PPARG, both of which can potently stimulate HBV replication.
212409	Tollip	10090	25586187	Super-low dose lipopolysaccharide induces inhibitory phosphorylation of Pik3c3 leading to the disruption of endosome-lysosome fusion and low-grade inflammation in innate macrophages; a mechanism that depends on the clearance and relocation of Tollip.
132410	Pik3c3	10090	22170068	Class III phosphatidylinositol 3-kinases (PI3K) are required for downstream Arf6 regulation of CpG oligodeoxynucleotide uptake and thus have a role in Tlr9-mediated immune signalling.
132410	Pik3c3	10090	25586187	Super-low dose lipopolysaccharide induces inhibitory phosphorylation of Pik3c3 leading to the disruption of endosome-lysosome fusion and low-grade inflammation in innate macrophages; a mechanism that depends on the clearance and relocation of Tollip.
177358	Tnf	10090	21602809	Tnf pre-treated macrophages exhibit endotoxin tolerance, i.e. less cytokine production, towards LPS challenge. Tnf-mediated cross-tolerization is mediated by suppression of LPS-induced signalling and chromatin remodelling.
177358	Tnf	10090	21611132	Tnf is essential to mount an acute inflammatory response to dsDNA in the endothelium.
177358	Tnf	10090	25683052	Mirlet7f and its target Tnfaip3 regulate immune responses to Mycobacterium tuberculosis and control bacterial burden by augmenting the production of Tnf and Il1b.
129000	Cav1	10090	19949109	Cav1 is an important component of the innate host immune response to the majority of non-cytotoxic strains of P. aeruginosa by promoting bacterial clearance during acute pneumonia and chronic colonization.
129000	Cav1	10090	25665524	The Akt1/Mir199a/Cav1 pathway is a regulator of innate immunity that is dysfunctional in cystic fibrosis macrophages contributing to lung hyper-inflammation.
223741	Mir199a-1	10090	25665524	The Akt1/Mir199a/Cav1 pathway is a regulator of innate immunity that is dysfunctional in cystic fibrosis macrophages contributing to lung hyper-inflammation.
174623	Akt1	10090	21196185	Akt1 is a Ser/Thr protein kinase that plays a pivotal role in functional activation in macrophages. Akt1 specifically functions in phagocytosis, intracellular bacterial infection, LPS tolerance, production of inflammatory cytokines/mediators, and migration during macrophage-mediate innate immunity.
174623	Akt1	10090	21683629	Akt1 activation is blocked by Bacillus anthracis, resulting in the opening of a connexin ATP release channel and induction of macrophage death. Constitutive activation of Akt1 interferes with inflammasome activation and Il1b production, which compromises antimicrobial immunity.
174623	Akt1	10090	22218715	Akt1 functions downstream of Tlr2-stimulation to induce the expression of the monocyte chemoattractant protein 1, Ccl2.
174623	Akt1	10090	25783839	Lysophosphatidic acid plays an anti-inflammatory role in macrophages by diminishing lipopolysaccharide-induced phosphorylation of Mapk14 and Akt1, as well as Rela nuclear translocation.
174623	Akt1	10090	25665524	The Akt1/Mir199a/Cav1 pathway is a regulator of innate immunity that is dysfunctional in cystic fibrosis macrophages contributing to lung hyper-inflammation.
100329	DR1	9606	25589657	DR1, a novel host susceptibility gene for influenza A virus replication, suppresses host innate immunity and enhances viral RNA replication.
190697	Il10	10090	21849677	Il10 contributes to antiviral innate immunity during acute infection by restricting activation-induced death in natural killer (NK) cells. Blockade of Il10 receptor during acute murine cytomegalovirus (CMV) infection markedly reduced the accumulation of cytotoxic NK cells in the spleen and lung.
190697	Il10	10090	22268692	Il10 has opposing functions in anti-microbial responses in its capacity to mediate protective immunity against some organisms but increase susceptibility to other infections.
190697	Il10	10090	22876184	Il10-mediated suppression of natural killer/dendritic cell crosstalk leads to prolonged mouse cytomegalovirus (MCMV) persistence due to poor priming of MCMV-specific T cells.
190697	Il10	10090	25826367	Retinoic acid treatment enhances Tlr2-dependent Il10 production from T cells and this, in turn, potentiates T regulatory cell generation without the need for activation of antigen presenting cells.
190697	Il10	10090	25959063	Intestinal macrophages that constitutively produce IL10, control excessive innate immune activation and prevent tissue damage after an acute bacterial infection.
69557	CASP4	9606	25964352	CASP4 is a critical regulator of noncanonical inflammasome activation that initiates defence against bacterial pathogens in primary macrophages by mediating cell death and IL1A release
62945	PTX3	9606	19050261	PTX3 is a multifunctional soluble molecule involved in inflammation and innate immunity. It is a unique factor H (FH) ligand in that it can bind both of the two hot-spots of FH and can participate in the localization of functionally active FH.
62945	PTX3	9606	20208538	PTX3, an essential component of humoral innate immunity, and immunoglobulins share functional outputs, including complement activation, opsonization and glycosylation-dependent regulation of inflammation.
62945	PTX3	9606	20363749	PTX3, an inflammation-associated long pentraxin, plays key roles in innate immunity, female fertility and vascular biology. PTX3 octamer contains two fibroblast growth factor 2 (FGF2) binding sites and this quaternary organization is required for the anti-angiogenic function of PTX3.
62945	PTX3	9606	20683616	PTX3 is produced by innate immunity cells (e.g. PMN, macrophages, dendritic cells) and it interacts with several ligands to play an essential role in innate immunity, tuning inflammation and matrix deposition. PTX3 provides a paradigm for the mode of action of humoral innate immunity.
62945	PTX3	9606	21106539	PTX3, serum amyloid P component (SAP) and C-reactive protein (CRP) belong to the pentraxin family of pattern recognition molecules involved in tissue homeostasis and innate immunity. PTX3 heterocomplexes with mannose-binding lectin (MBL) to trigger cross-activation of the complement system.
62945	PTX3	9606	21465531	PTX3 production is up-regulated in response to serum amyloid A, and contributes to the inflammatory pathogenesis of atherosclerosis.
62945	PTX3	9606	21490156	FCN3 and PTX3 are soluble oligomeric pattern-recognition molecules that interact with each other and act synergistically to activate the lectin complement pathway.
62945	PTX3	9606	22278372	PTX3 forms a complex with components of neutrophil extracellular traps in septic patients.
62945	PTX3	9606	23475792	Sputum PTX3 level are lower in cystic fibrosis patients due to proteolytic cleavage by Aspergillus fumigatus.
62945	PTX3	9606	25679762	PTX3 acts as an extrinsic oncosuppressor gene by regulating Complement-dependent, macrophage-sustained, tumor-promoting inflammation.
62945	PTX3	9606	25964372	PTX3 plays a non-redundant protective role in orchestrating tissue repair and remodeling by interacting with fibrin and plasminogen.
102649	S100A12	9606	25964473	S100A12 is induced in response to H. pylori infection and inhibits bacterial growth and viability in vitro by binding nutrient zinc.
45673	CXCL14	9606	25964486	CXCL14 is important for constitutive antimicrobial defences against pneumonia
201810	Myo18a	10090	25965346	Myo18a isoforms differentially regulate trafficking, expression, and activation of innate immune receptors on macrophages
207763	Rac1	10090	25972472	Cd81 inhibits Rac1/Stat1 activation and negatively regulates the defence mechanisms to Listeria monocytogenes infection.
212677	Cd81	10090	25972472	Cd81 inhibits Rac1/Stat1 activation and negatively regulates the defence mechanisms to Listeria monocytogenes infection.
38977	CAPRIN1	9606	25784705	The G3BP1-CAPRIN1-PRKRA complex represents a new mode of PRKRA activation and links stress responses with innate immune activation through PRKRA without a requirement for foreign double-stranded RNA pattern recognition.
54619	G3BP1	9606	25520508	EIF2AK2 (PKR) is recruited to stress granules by G3BP1 to promote innate immune responses at both transcriptional and translational levels.
54619	G3BP1	9606	25784705	The G3BP1-CAPRIN1-PRKRA complex represents a new mode of PRKRA activation and links stress responses with innate immune activation through PRKRA without a requirement for foreign double-stranded RNA pattern recognition.
65053	ULK1	9606	25792739	Stimulation of TMEM173-dependent IRF3 activation by ultraviolet radiation is due to apoptotic signalling-dependent disruption of ULK1, a pro-autophagic protein that negatively regulates TMEM173.
152923	Nfil3	10090	21383239	Nfil3 is an Il12b transcriptional inhibitor in macrophages. Interactions of macrophages with the enteric microbiota induce Nfil3 to limit their inflammatory capacity.
152923	Nfil3	10090	25801035	Nfil3 is a key regulator of common helper-like innate lymphoid cell progenitors as they emerge during early lymphopoiesis.
194391	Anpep	10090	25801433	Lipopolysaccharide-mediated myeloid Anpep (CD13) expression governs internalization of Tlr4 and negatively regulates Tlr4 signalling, thereby balancing the innate response by maintaining the inflammatory equilibrium critical to innate immune regulation.
77255	WFDC12	9606	25770093	WFDC12 plays a role in the regulation of lung inflammation.
184766	Ctnnd1	10090	25773174	Ctnnd1 expressed in alveolar type II epithelial cells plays a critical role in regulating the innate immunity of the entire lung.
150795	Ly6g	10090	25781937	Escherichia coli toxin CNF1 promotes the maturation/secretion of Il1b while the Î±-hemolysin toxin inhibits Il1b secretion without affecting the recruitment of Ly6g+ cells.
132298	Rela	10090	21209118	Rela is a subunit of NFKB and is not essential for virus-stimulated Ifnb expression, instead, Rela sustains autocrine Ifnb signaling prior to infection. The absence of Rela causes significant delays in Ifnb induction and consequently defective secondary antiviral gene expression. Rela maintains autocrine Ifnb signaling in uninfected cells, facilitates inflammatory and adaptive immune responses fo…
132298	Rela	10090	21216972	Rela is critical for pulmonary host defense during Streptococcus pneumoniae pneumonia in alveolar macrophages. During pneumococcal pneumonia, only the earliest induction of cytokines depends on transcription regulated by Rela in myeloid cells, and this transcriptional activity contributes to effective immunity.
132298	Rela	10090	21419662	Rela is required for Il17a production in T cell in response to bacterial infection. Rela deficient T cells resulted in a diminished innate immune response to E. coli infection.
132298	Rela	10090	24023826	Tnfaip3 is regulated by both Nf-ÎºB and p38-dependent Cebpb in response to LPS in macrophages.
132298	Rela	10090	24656046	The noncanonical NFÎºB pathway regulates histone modifications at the Ifnb1 promoter resulting in attenuated recruitment of Rela and histone demethylase, Kdm4a, to the Ifnb1 promoter. This provides a mechanism for regulating the induction of type I interferons .
132298	Rela	10090	25783839	Lysophosphatidic acid plays an anti-inflammatory role in macrophages by diminishing lipopolysaccharide-induced phosphorylation of Mapk14 and Akt1, as well as Rela nuclear translocation.
148423	Il1rl1	10090	22922442	IL1RL1 (ST2) pre-treatment suppresses cytokine production and inhibits LPS signalling in dendritic cells. (Demonstrated in human)
148423	Il1rl1	10090	25786179	Cigarette smoke decreases Il1rl1 expression on group 2 innate lymphoid cells while elevating Il1rl1 expression on macrophages and natural killer cells, thus altering Il33 responsiveness within the lung to infection.
55271	HAVCR2	9606	21637332	HAVCR2 is constitutively expressed on human resting monocytes/macrophages and functions as a cap to block IL12, which is a key pro-inflammatory cytokine linking innate and adaptive immune responses. HAVCR2 plays a crucial role in the negative regulation of innate immune responses through crosstalk with PDCD1 and SOCS1 to limit STAT1 phosphorylation in HCV infection.
55271	HAVCR2	9606	23967307	TLR activation promotes HAVCR2 and LGALS9 association within the same macrophage to differentially regulate IL12/IL23 expressions via STAT3 phosphorylation.
55271	HAVCR2	9606	25772938	Hepatitis C virus (HCV)-induced, MIR155-regulated HAVCR2 expression regulates natural killer cell function, suggesting a novel mechanism for balancing immune clearance and immune injury during chronic viral infection.
8510	HIF1A	9606	18606657	HIF1A transcription is induced by IFNA2 in human endothelial cells though a JAK-ISGF3 pathway under normoxic conditions, and that this response contributes to the anti-proliferative activity of this cytokine.
8510	HIF1A	9606	17965024	HIF1A expression is regulated by intracellular calcium levels, resulting in modulation of PPP3CA (calcineurin) activity and RACK1 dimerization.
8510	HIF1A	9606	20517715	Hypoxia-inducible factors (HIFs), including HIF1A, regulate glycolytic energy generation, optimize innate immunity, control pro-inflammatory gene expression, mediate bacterial killing and influence cell migration. HIFs contribute to inflammatory functions in various components of innate immunity, such as neutrophils, dendritic cells, mast cells, and epithelial cells.
8510	HIF1A	9606	20511350	HIF1A, the most ubiquitously expressed hypoxia-inducible factor (HIF), in epithelial cells alters the lung's innate immune response and biases the tissue toward a Th2-mediated inflammation.
8510	HIF1A	9606	21685248	HIF1A, under normoxic conditions, accumulates in dendritic cells via the TLR/MYD88/NFkB signalling pathway to induce a distinct subset of proinflammatory genes in comparison to hypoxia-induced HIF1A. (Demonstrated in murine model)
8510	HIF1A	9606	25746953	HIF1A mediates the functional plasticity of monocytes during sepsis, wherein they transit from a pro-inflammatory to an immunosuppressive phenotype, while enhancing protective functions like phagocytosis, anti-microbial activity, and tissue remodelling .
243385	CHUK	9606	12351658	CHUK is part of the inhibitor kappaB kinase (IKK) complex that phosphorylates IRS1 at Ser(312) and this contributes to the insulin resistance mediated by activation of inflammatory pathways.
243385	CHUK	9606	9891086	CHUK (IKK-alpha) is part of the IKK signalosome that phosphorylates NFKBIA and NFKBIB, leading to activation of NF-kappaB.
243385	CHUK	9606	17434128	CHUK (IKKalpha) phosphorylates CREBBP (CBP), regulating the CBP-mediated crosstalk between NF-kappaB and p53, a critical factor in the promotion of cell proliferation and tumor growth.
243385	CHUK	9606	20200270	CHUK is a unique molecule involved in TLR7/9-MyD88-dependent type I IFN production through dendritic cell subset-specific mechanisms.
243385	CHUK	9606	21765415	CHUK has a key role in the negative feedback of NF-kB canonical signalling by orchestrating the assembly of the A20 ubiquitin-editing complex to limit inflammatory gene activation in response to proinflammatory stimuli such as TNF and IL1. (Demonstrated in mouse)
243385	CHUK	9606	23422957	CHUK is required in dendritic cells to prime adaptive immunity to Listeria monocytogenes.
243385	CHUK	9606	24323043	GNB2L1 (RACK1) negatively regulates NFÎºB activation by interacting with CHUK and IKBKB. The interaction interferes with the recruitment of the IKK complex to TRAF2 .
243385	CHUK	9606	25740981	DDX3X initiates a multifaceted cellular program involving dynamic associations with hepatitis C virus (HCV) RNA and proteins, CHUK, stress granules, and lipid droplet surfaces for its crucial role in the HCV life cycle.
209781	Mapk3	10090	25538234	Ptpn11 phosphatase function positively regulates Clec7a- and Itgam-stimulated reactive oxygen species production in macrophages by dephosphorylating and thus mitigating the inhibitory function of Sirpa and by promoting Mapk1/Mapk3 activation.
209781	Mapk3	10090	25757564	Prostaglandin E2 transactivates Csf1r and synergizes with its signalling at Mapk1/Mapk3 level in promoting macrophage migration.
137672	Mapk1	10090	22447027	Mapk1 (ERK) and Mapk14 (p38) control the dynamic balance regulating neutrophil migration. (Demonstrated in human)
137672	Mapk1	10090	25538234	Ptpn11 phosphatase function positively regulates Clec7a- and Itgam-stimulated reactive oxygen species production in macrophages by dephosphorylating and thus mitigating the inhibitory function of Sirpa and by promoting Mapk1/Mapk3 activation.
137672	Mapk1	10090	25757564	Prostaglandin E2 transactivates Csf1r and synergizes with its signalling at Mapk1/Mapk3 level in promoting macrophage migration.
150998	Csf1r	10090	25757564	Prostaglandin E2 transactivates Csf1r and synergizes with its signalling at Mapk1/Mapk3 level in promoting macrophage migration.
146254	Traf2	10090	22546736	Traf2 deficiency results in the accumulation of Tnf-dependent, Il10-secreting neutrophils. Combined treatment of neutralizing antibodies against both Tnf and Il10 substantially ameliorated the colitis phenotype in the Traf2 null mice.
146254	Traf2	10090	23951545	The binding of MAVS to Traf2, Traf5, and Traf6 is dependent on virus infection and MAVS polymerization . The TRAF proteins promote ubiquitination that recruits IKBKG binding to the MAVS signalling complex.
146254	Traf2	10090	25565375	Traf2 mediates proteasome-dependent degradation of Irf5 and Rel as well as regulating macrophage polarization in tumour microenvironment and controlling tumour growth.
146254	Traf2	10090	25752829	Traf2-deficient macrophages produce reduced levels of inflammatory cytokines in response to lipopolysaccharide or flagellin stimulation and exhibit increased susceptibility to S. Typhimurium infection.
135734	Cfp	10090	25725105	Cfp plays a role in intestinal homeostasis in response to an infectious challenge to activate Hc (C5a), which in turn provides protection through Il6 expression by the epithelium.
163835	Hc	10090	25725105	Cfp plays a role in intestinal homeostasis in response to an infectious challenge to activate Hc (C5a), which in turn provides protection through Il6 expression by the epithelium.
71390	IL18	9606	20195505	IL18 and IL1B are important pro-inflammatory cytokines that activates monocytes, macropages, and neutrophils, as well as induce the Th1 and Th17 adaptive cellular responses.
71390	IL18	9606	22940097	IL18 secreted by inflammatory monocytes is critical for the differentiation of memory CD8(+) T and NK lymphocytes into antimicrobial effector cells. (Demonstrated in mice)
71390	IL18	9606	25732728	Primary Î³Î´ T cells provide an early source of IFNG during dengue virus (DV) infection and target DV-infected cells. Monocytes also participate as accessory cells that sense DV infection and amplify the cellular immune response in an IL18-dependent manner.
152685	Tlr3	10090	21220319	Tlr3 deletion dramatically enhanced the development of elastic lamina damage after collar-induced injury, indicating that Tlr3 signalling plays a protective role in arterial vessel wall.
152685	Tlr3	10090	21367858	Tlr3 activation by Poly(I:C) in the endothelial cells induces Poly(I:C) dose- and time-dependent cell apoptosis. Specifically, Tlr3 stimulation triggered the signalling of both extrinsic and intrinsic apoptotic pathways.
152685	Tlr3	10090	21402738	Tlr3 requires proteolytic processing in endolysosome by asparagine endopeptidase and cathepsin in the endolysosome to initiate signalling in response to DNA.
152685	Tlr3	10090	21498625	Tlr3 expression is inducible by LPS via Tlr4-Myd88-Irak-Traf6-NfkB dependent signalling pathway. (Demonstrated in human)
152685	Tlr3	10090	21695051	Tlr3 is necessary to establish an antiviral state in hepatocytes infected with hepatitis C Virus. HCV envelope proteins counteract the antiviral host defence by inhibiting the expression of Tlr3. (Demonstrated in human)
152685	Tlr3	10090	22016778	TLR3 signalling is enhanced by the presence of viral double-strand RNA-binding proteins. (Demonstrated in human)
152685	Tlr3	10090	22072781	Tlr3-Ticam1-mediated signalling pathway plays an essential role in the anti-viral response against poliovirus infection.
152685	Tlr3	10090	22262694	Tlr3 is constitutively expressed in spermatogonia and spermatocytes, and has the ability to activate anti-viral responses.
152685	Tlr3	10090	22421964	Upon engagement with its ligand, dsRNA, Tlr3 possesses the ability to recruit Casp8 and Ripk1 to induce apoptosis. (Demonstrated in human)
152685	Tlr3	10090	22754655	Activation of Tlr3 with poly(I:C) mediates antiviral immunity that diminishes coronavirus production in macrophages.
152685	Tlr3	10090	22570612	Upregulation of Tlr3 in intestinal epithelia during infancy may contribute to age-dependent susceptibility to rotavirus infection.
152685	Tlr3	10090	22986631	TLR3 activation differentially regulates phagocytosis of bacteria and apoptotic neutrophils by peritoneal macrophages.
152685	Tlr3	10090	23142781	Tlr3 contributes to the control of activated endogenous retroviruses (ERVs) and ERV-induced tumours.
152685	Tlr3	10090	25736436	Wdfy1 is a crucial adaptor protein in the Tlr3/4 signalling pathway. Wdfy1 interacts with Tlr3 and Tlr4 and mediates the recruitment of Ticam1 to these receptors.
172895	Wdfy1	10090	25736436	Wdfy1 is a crucial adaptor protein in the Tlr3/4 signalling pathway. Wdfy1 interacts with Tlr3 and Tlr4 and mediates the recruitment of Ticam1 to these receptors.
157290	Ear11	10090	25713137	Ear11 has prominent chemoattractant activity for F4/80(+)CD11c(-) tissue macrophages.
166389	Tnfrsf13c	10090	25673724	Tnfrsf13c (BAFFR) expression is critical for innate immune activation and antiviral immunity. Tnfrsf13c deficiency results in reduced enforced viral replication, limited type I interferon production, and reduced adaptive immunity.
149887	Ptx3	10090	21465531	Ptx3 production is up-regulated in response to serum amyloid A, and contributes to the inflammatory pathogenesis of atherosclerosis. (Demonstrated in human)
149887	Ptx3	10090	22278372	Ptx3 forms a complex with components of neutrophil extracellular traps in septic patients. (Demonstrated in human)
149887	Ptx3	10090	25679762	Ptx3 acts as an extrinsic oncosuppressor gene by regulating Complement-dependent, macrophage-sustained, tumor-promoting inflammation.
142284	Osm	10090	25692402	Stat3 is required for maximal Osm-induced lung Cxcl5 expression and subsequent neutrophil recruitment during bacterial pneumonia.
178768	Cxcl5	10090	25692402	Stat3 is required for maximal Osm-induced lung Cxcl5 expression and subsequent neutrophil recruitment during bacterial pneumonia.
211637	Stat3	10090	21810606	Stat3 is a negative regulator of type I IFN-mediated anti-viral responses.
211637	Stat3	10090	23460517	STAT3 mediates protein transport and secretion in hepatocytes during the acute phase of pneumonia.
211637	Stat3	10090	24412612	Stat3 mediates protection against intestinal infection by inducing innate lymphoid cell derived-Il22.
211637	Stat3	10090	25692402	Stat3 is required for maximal Osm-induced lung Cxcl5 expression and subsequent neutrophil recruitment during bacterial pneumonia.
165511	Atm	10090	25692705	Unrepaired DNA lesions induce type I interferons via the Tmem173 pathway, resulting in enhanced anti-viral and anti-bacterial responses in Atm (-/-) mice.
71032	CXCR4	9606	21094463	CXCR4 is a chemokine receptor that is essential for homing of stem cells and more mature neutrophils to the bone marrow.
71032	CXCR4	9606	25705792	MIR146A upregulation by CXCR4 antagonist AMD3100 treatment or ZBTB16 silencing, decreases CXCR4 protein expression and prevents HIV-1 infection of leukemic monocytic cell line and CD4(+) T lymphocytes.
72004	ZBTB16	9606	25705792	MIR146A upregulation by CXCR4 antagonist AMD3100 treatment or ZBTB16 silencing, decreases CXCR4 protein expression and prevents HIV-1 infection of leukemic monocytic cell line and CD4(+) T lymphocytes.
53480	IL1RAPL1	9606	25654981	IL37 acts as an extracellular cytokine to inhibit innate inflammation by binding to IL18R1 and then using IL1RAPL1 for its anti-inflammatory properties.
64199	IL18R1	9606	25654981	IL37 acts as an extracellular cytokine to inhibit innate inflammation by binding to IL18R1 and then using IL1RAPL1 for its anti-inflammatory properties.
66559	IL1F7	9606	20935647	IL1F7 (IL-37) is a natural suppressor of innate inflammatory and immune responses. IL1F7 expression in macrophages or epithelial cells suppresses production of pro-inflammatory cytokines and the abundance of these cytokines increases with silencing of endogenous IL1F7 in human blood cells.
66559	IL1F7	9606	21873195	IL1F7 functions as a key modulator of intestinal inflammation where transgenic mice expressing IL1F7 subjected to dextran sulfate sodium-induced colitis showed reduced inflammation which was associated with decreased leukocyte recruitment into the colonic lamina propria. (Demonstrated in murine model)
66559	IL1F7	9606	24481253	The precursor and mature forms of IL37 are secreted from activated cells upon inflammasome activation and CASP1 processing of IL37 is important for its anti-inflammatory activity.
66559	IL1F7	9606	25654981	IL37 acts as an extracellular cytokine to inhibit innate inflammation by binding to IL18R1 and then using IL1RAPL1 for its anti-inflammatory properties.
141954	Sf3a1	10090	25658809	Sf3a1 affects the mRNA splicing of genes in the TLR signalling pathway to modulate the innate immune response in macrophages.
17145	CLEC6A	9606	20493731	CLEC6A (Dectin-2) recognition of alpha-mannans and induction of Th17 cell differentiation is essential for host defence against Candida albicans.
17145	CLEC6A	9606	21267996	CLEC6A, a C-type lectin receptor, is a pattern recognition receptor critical for immune responses to fungi. CLEC6A is coupled to SYK kinase and signals via CARD9 to activate NFKB, which in turns induces both innate and adaptive immunity.
17145	CLEC6A	9606	21357742	CLEC6A is critical for the development of house dust mite (Dermatophagoides farinae) elicited eosinophilic and neutrophilic pulmonary inflammation. CLEC6A was also found to be crucial for the Th2 cytokine induction in the lungs and re-stimulated lymph nodes.
17145	CLEC6A	9606	21677049	CLEC6A is expressed mainly in DCs and macrophages. CLEC6A recognizes alpha-mannans with its carbohydrate recognition domain and transduces signals through association with the ITAM-containing Fc receptor gamma chain, which recruits SYK and initiates the CARD9/NFkB signalling cascade.
17145	CLEC6A	9606	23911656	CLEC4D and CLEC6A form a heterodimer complex which confers innate cells high ability to sense C. albicans infection by facilitating the activation of NFÎºB dependent inflammatory responses.
17145	CLEC6A	9606	25659141	Plasmacytoid dendritic cells (pDCs) directly recognize Aspergillus fumigatus hyphae via CLEC6A; this interaction results in antifungal activity and the formation of pDC extracellular traps.
162436	Cd200r1	10090	25654642	Cd200-Cd200r1 pathway is an important regulator of antiviral immunity during cytomegalovirus infection that is exploited by murine cytomegalovirus to establish chronicity within mucosal tissue.
162936	Cd200	10090	25654642	Cd200-Cd200r1 pathway is an important regulator of antiviral immunity during cytomegalovirus infection that is exploited by murine cytomegalovirus to establish chronicity within mucosal tissue.
28318	ANO6	9606	25651887	Stimulation of P2RX7 receptors activates ANO6 to enhance bacterial phagocytosis and killing by macrophages.
61253	P2RX7	9606	18765670	P2X7 activity is modulated by human cathelicidin CAMP (LL-37) receptor in a structure-dependent manner and is involved in the proliferative cell response to CAMP.
61253	P2RX7	9606	21988719	P2RX7 activation in lipopolysaccharide (LPS)-primed myeloid cells results in secretion of pro-inflammatory cytokines IL1B and IL18. In addition, P2RX7 functions in the recognition and phagocytosis of non-opsonized bacteria and apoptotic cells.
61253	P2RX7	9606	23479230	P2RX7 engagement with ATP analog initiates cutaneous inflammation, dendritic cell differentiation, and induction of Th17 immunity.
61253	P2RX7	9606	25651887	Stimulation of P2RX7 receptors activates ANO6 to enhance bacterial phagocytosis and killing by macrophages.
178353	Zfp423	10090	25554785	The transcription factor Zfp423 is necessary for adipocyte activation and impaired adipogenesis is observed in Zfp423(nur12) mice.
155648	Rel	10090	25565375	Traf2 mediates proteasome-dependent degradation of Irf5 and Rel as well as regulating macrophage polarization in tumour microenvironment and controlling tumour growth.
132026	Irf5	10090	22412986	Phosphorylation of Irf5 at ser451 and ser462 is the primary trigger of Irf5 function in nuclear accumulation, transcription and apoptosis. (Demonstrated in human)
132026	Irf5	10090	25031348	Irf5 modulates West Nile virus pathogenesis and host immune responses by shaping the early pro-inflammatory cytokine response in the draining lymph node.
132026	Irf5	10090	25565375	Traf2 mediates proteasome-dependent degradation of Irf5 and Rel as well as regulating macrophage polarization in tumour microenvironment and controlling tumour growth.
98707	SLC22A3	9606	25561729	SLC22A3 deficiency significantly decreases lipopolysaccharide- induced monocytic inflammatory response by interrupting NF-kB and MAPKs (mitogen-activated protein kinases) signalling cascades in a histamine dependent manner.
48458	TPP2	9606	25525876	TPPII controls the balance between intracellular amino acid availability, lysosome number, and glycolysis, which is vital for adaptive and innate immunity and neurodevelopmental health.
44867	EIF2AK2	9606	12954221	EIF2AK2 is a protein kinase that is regulated by RNA and is an important mediator of the antiviral and anti proliferative actions of interferon (IFN).
44867	EIF2AK2	9606	12954221	EIF2AK2 binds both SP1 and SP3 but only SP3 functions as part of the interferon-inducible complex with ISGF-3 proteins, consisting of STAT1, STAT2, and IRF9.
44867	EIF2AK2	9606	19028691	EIF2AK2 enhances the induction of interferon-beta and apoptosis mediated by cytoplasmic RNA sensors where in addition to MAVS and IRF3 but not TRIF, it is required for maximal type I IFN-beta induction and the induction of apoptosis by both transfected T7 phage polymerase-synthesized RNAs (PRNAs) and polyinosinic-polycytidylic acid.
44867	EIF2AK2	9606	20485506	EIF2AK2 is used by hepatitis C virus to restrain its ability to induce IFN through the RIG-I/MAVS pathway.
44867	EIF2AK2	9606	22912779	Antiviral stress granules containing DDX58 (RIG-I) and EIF2AK2 (PKR) have a critical role in viral detection and innate immunity. (Demonstrated in mouse)
44867	EIF2AK2	9606	23115300	Herpes simplex virus evades antiviral host defence by interacting with EIF2AK2 (PKR) to inhibit autophagy.
44867	EIF2AK2	9606	23236554	Bacterial dsRNA or poly(I:C) induces tyrosine phosphorylation of PKR activation by JAK kinases.
44867	EIF2AK2	9606	23372823	EIF2AK2 binds to dsRNA to inhibit IFN induction triggered by dengue virus.
44867	EIF2AK2	9606	25520508	EIF2AK2 (PKR) is recruited to stress granules by G3BP1 to promote innate immune responses at both transcriptional and translational levels.
16084	RPS6KA5	9606	18690222	RPS6KA5 negatively regulates TLR-pathway driven inflammation by preventing the binding of phosphorylated transcription factors CREB and ATF1 to IL10 and DUSP1 promoters.
16084	RPS6KA5	9606	19922413	RPS6KA5 regulates the transcription of IL1RA in response to TLR activation in macrophages.
16084	RPS6KA5	9606	25520509	Paramyxoviruses trigger the DNA-damage response, a pathway required for RPS6KA5 activation of phospho Ser 276 RELA formation to trigger the IRF7-DDX58 amplification loop necessary for mucosal interferon production.
16268	IFITM3	9606	20064371	IFITM3 is an antiviral restriction factor that mediates cellular resistance to influenza A H1N1 virus, West Nile virus, and Dengue virus.
16268	IFITM3	9606	20601941	IFITM3 is post-translationally regulated by S-palmitoylation on membrane-proximal cysteines, which controls its clustering in membrane compartments and its antiviral activity against influenza virus.
16268	IFITM3	9606	25525793	NRAV, a long noncoding RNA, modulates antiviral responses by negatively regulating the initial transcription of multiple critical interferon-stimulated genes, including IFITM3 and MX1, by affecting their histone modification.
50271	INSIG1	9606	25526307	Upon cytoplasmic DNA stimulation, the endoplasmic reticulum protein AMFR is recruited to and interacts with TMEM173 in an INSIG1-dependent manner.
31785	AMFR	9606	25526307	Upon cytoplasmic DNA stimulation, the endoplasmic reticulum protein AMFR is recruited to and interacts with TMEM173 in an INSIG1-dependent manner.
155976	Eif4ebp2	10090	25531441	Genetic deletion of Eif4ebp1 or Eif4ebp2 potentiates innate antiviral immunity by enhancing translation of Irf7.
145947	Eif4ebp1	10090	25531441	Genetic deletion of Eif4ebp1 or Eif4ebp2 potentiates innate antiviral immunity by enhancing translation of Irf7.
151723	Anxa1	10090	25533809	Anxa1-/- mice are more susceptible to Mycobacterium tuberculosis infection as evidenced by a transient increase in pulmonary bacterial burden, exacerbated and disorganized granulomatous inflammation and impaired ability of Anxa1-/- dendritic cells to activate naÃ¯ve T cells.
206000	Sirpa	10090	25538234	Ptpn11 phosphatase function positively regulates Clec7a- and Itgam-stimulated reactive oxygen species production in macrophages by dephosphorylating and thus mitigating the inhibitory function of Sirpa and by promoting Mapk1/Mapk3 activation.
210531	Itgam	10090	20639876	Itgam (Cd11b integrin) is activated via Toll-like receptors (TLRs) and engages in crosstalk with the Myd88 and Ticam1 (TRIF) pathways inhibiting TLR signalling in innate immune responses.
210531	Itgam	10090	21245270	Itgam :: Itgb2 is the principal leukocyte receptor involved in the recognition of the fungus Candida albicans. Recognition of Pra1p protein of C. albicans by Itgam :: Itgb2 plays a pivotal role in determining fungal virulence, and host response/protection against C. albicans infection.
210531	Itgam	10090	24423728	Itgam (Cd11b) fine tunes the balance between adaptive and innate immune responses initiated by LPS by modulating the trafficking and signalling functions of Tlr4 in a cell-type-specific manner.
210531	Itgam	10090	25538234	Ptpn11 phosphatase function positively regulates Clec7a- and Itgam-stimulated reactive oxygen species production in macrophages by dephosphorylating and thus mitigating the inhibitory function of Sirpa and by promoting Mapk1/Mapk3 activation.
256772	Clec7a	10090	21267996	Clec7a, a C-type lectin receptor, is a pattern recognition receptor critical for immune responses to fungi. Clec7a is coupled to Syk kinase and signals via Card9 to activate NFKB, which in turns induces both innate and adaptive immunity.
256772	Clec7a	10090	21677049	Clec7a is expressed mainly in DCs and macrophages. Clec7a recognizes beta-glucans with its carbohydrate recognition domain and transduces signals through its ITAM-like motif in the cytoplasmic region, which recruits Syk and initiates the Card9/NFkB signalling cascade.
256772	Clec7a	10090	22267217	Clec7a acts as an extracellular sensor for fungi and mycobacteria that induce both Il1b production and maturation for protective immunity. (Demonstrated in human)
256772	Clec7a	10090	22543832	The functional activity of Clec7a in mucosal immunity to Candida albicans is dependent on the genetic background of the host; this was specifically observed in two strains of mice, C57BL/6 and BALB/c.
256772	Clec7a	10090	23386437	Clec7a is necessary for macrophage activation and resistance to pathogenic fungus Coccidioidesimmitis.
256772	Clec7a	10090	25538234	Ptpn11 phosphatase function positively regulates Clec7a- and Itgam-stimulated reactive oxygen species production in macrophages by dephosphorylating and thus mitigating the inhibitory function of Sirpa and by promoting Mapk1/Mapk3 activation.
196834	Ptpn11	10090	25538234	Ptpn11 phosphatase function positively regulates Clec7a- and Itgam-stimulated reactive oxygen species production in macrophages by dephosphorylating and thus mitigating the inhibitory function of Sirpa and by promoting Mapk1/Mapk3 activation.
177236	Irak4	10090	20595480	IRAK4-mediated innate immune inflammatory responses play critical roles in divergent clinical outcomes in murine malaria models when Irak4 (-/-) mice were used to study two experimental models of malaria.
177236	Irak4	10090	24717937	Irak4 activation is impaired during endotoxin tolerization; a process which impairs the production of LPS-induced pro-inflammatory cytokines without inhibition expression of anti-inflammatory or anti-microbial mediators.
177236	Irak4	10090	23027530	Irak4 deficient mice show impaired innate immunity, leading to defective Type 1 T-cell responses, B-cell expansion, and are more susceptible to Toxoplasma gondii infection.
177236	Irak4	10090	24717937	Mir302b expression is up-regulated upon bacterial infection and is a crucial regulator of NFÎºB signalling by directly targeting IRAK4
177236	Irak4	10090	25548221	Irak4 is a molecular target of chlorogenic acid in the treatment of innate immunity-related shock and organ dysfunction following insult of various Toll-like receptor pathogens from bacteria and viruses.
212533	Cd40	10090	25549946	Tmem126a upregulates genes involved in antigen presentation; such as Icam1, MHC II, Cd86 and Cd40, via the Tlr4 signal transduction pathway.
158071	Cd86	10090	25549946	Tmem126a upregulates genes involved in antigen presentation; such as Icam1, MHC II, Cd86 and Cd40, via the Tlr4 signal transduction pathway.
138668	Icam1	10090	25549946	Tmem126a upregulates genes involved in antigen presentation; such as Icam1, MHC II, Cd86 and Cd40, via the Tlr4 signal transduction pathway.
198859	Tmem126a	10090	25549946	Tmem126a upregulates genes involved in antigen presentation; such as Icam1, MHC II, Cd86 and Cd40, via the Tlr4 signal transduction pathway.
26364	TP53	9606	21483755	TP53 binds to canonical and non-canonical promoter regions of the human TLR gene family and up-regulates the expression of TLRs. The activation of TP53 can directly influence the TLR-mediated induction of cytokines.
26364	TP53	9606	22105999	TP53 serves as a host antiviral factor and enhances both the innate and adaptive immune responses to influenza A virus. (Demonstrated in mice)
26364	TP53	9606	25505178	Coronavirus engages papain-like proteases to escape from the innate antiviral response of the host by inhibiting TP53-IRF7-IFNB1 signalling.
178961	Atg7	10090	25512546	Atg7 plays an essential role for autophagy during invariant natural killer T cell development.
138680	Arl5b	10090	25451939	Arl5b negatively regulates the antiviral innate immune response by binding to Ifih1 and prevents the subsequent interaction of Ifih1 to poly(I:C).
282076	MIR548G	9606	25499200	Overexpression of MIR548G suppresses multiplication and translation of dengue virus (DENV) 1, 2, 3 and 4.
102654	S100A8	9606	12626582	S100A8 is an intracellular calcium-binding protein that promotes neutrophil/monocyte recruitment at inflamed tissues by enhancing attachment to endothelial cells.
102654	S100A8	9606	18714033	S100A8 is a myeloid-related protein that rapidly modulates macrophage nitric oxide production during innate immune response.
102654	S100A8	9606	20555353	S100A8 (calgranulin A) and S100A9 (calgranulin B) form an antimicrobial heterodimeric complex known as calprotectin. Bacterial flagellin induces the upregulation of S100A8/S100A9 heterodimer via a TLR5-dependent mechanism in epidermal keratinocytes.
102654	S100A8	9606	21239714	S100A8 forms a complex with S100A9 and the complex is the site of interplay between extracellular Ca(2+) entry and intra-phagosomal reactive oxygen species production. S100A8 :: S100A9 acts as Ca(2+) sensor in phagosomal ROS production.
102654	S100A8	9606	22423963	S100A8 is strongly upregulated in neutrophils upon bacterial infection, and sequesters zinc as a mechanism of nutritional immunity. Salmonella typhimurium overcomes this defence mechanism by expressing a high affinity zinc transporter. (Demonstrated in mice)
102654	S100A8	9606	23431180	S100A8::S100A9 heterodimer sequesters Mn(2+) and Zn(2+) to starve bacteria of these essential nutrients.
102654	S100A8	9606	25505274	The TLR4/S100A8 axis is important in the activation of monocytes.
90504	IL17A	9606	19144317	IL17A is a cytokine produced by T helper 17 (Th17) cells that plays important roles in the development of inflammatory diseases.
90504	IL17A	9606	20083670	IL17A is an innate-adaptive immunomodulatory cytokine that is produced by gammadelta cells and is a key mediator for the innate immune response to urinary tract infections (UTIs) caused by uropathogenic Escherichia coli.
90504	IL17A	9606	21074482	IL17A is a Th17-related cytokine, traditionally thought of as an adaptive responder, has been shown to have various innate sources and functions as a rapidly produced pro-inflammatory mediator. Innate IL17A-producing cells also employ many of the cytokine and transcriptional regulators utilized by Th17 cells.
90504	IL17A	9606	21822258	IL17A signalling enhances the mRNA stability of chemokine CXCL1 through TRAF3IP2, TRAF2-TRAF5 and the RNA-binding protein SRSF1.
90504	IL17A	9606	22384827	IL17A is significantly upregulated in both S. pyogenes inoculated and mock inoculated mice, indicating that the cytokine production can be triggered by inoculation trauma alone. (Demonstrated in mice)
90504	IL17A	9606	24194936	Local production of IL17A in the airways drives early neutrophil infiltration into respiratory syncytial virus infected infant lungs.
90504	IL17A	9606	25474109	IFNG interferes with the IL-1/NFKBIZ axis in Î²-glucan-activated dendritic cells and promotes T cell-mediated immune responses with increased release of IFNG and IL22, and diminished production of IL17A.
96992	IL22RA2	9606	25476703	IL22 protects against and IL22RA2 aggravates liver fibrosis and cirrhosis in chronic liver infections.
178955	Cxcl2	10090	21757770	Cxcl2 is a chemokine secreted by kidney dendritic cells to recruit neutrophils to sites of uropathogenic bacterial infection.
178955	Cxcl2	10090	25447519	Cebpa suppresses granule formation in mast cells and increases Cxcl2 production from mast cells upon bacterial stimulation.
173713	Cebpa	10090	21326902	Cebpa is a member of the CCAAT enhancer binding protein family and is a transcriptional factor regulating genes in innate immunity and inflammation. The activities of CEBP are regulated via methylation of arginine and lysine side chains.
173713	Cebpa	10090	25447519	Cebpa suppresses granule formation in mast cells and increases Cxcl2 production from mast cells upon bacterial stimulation.
13675	TLR6	9606	15661917	TLR6 co-expressed withTLR2 at the cell surface is crucial for recognition of diacylated lipopeptide and peptidoglycan derived from mycoplasma and to activate the NF-kappaB signalling cascades in human cells.
13675	TLR6	9606	12697090	TLR6 and TLR1 are involved in the discrimination of a subtle difference between triacyl and diacyl lipopeptides through interaction with TLR2.
13675	TLR6	9606	15690042	TLR6/2 heterodimer signalling is used by CD36, a selective and non-redundant sensor of microbial diacylglycerides.
13675	TLR6	9606	20037584	TLR6-CD36-TLR4 activation is a common molecular mechanism by which atherogenic lipids and amyloid-beta stimulate sterile inflammation.
13675	TLR6	9606	21482737	TLR2::TLR6 synergistically interacts with TLR9 in lung epithelium to induce rapid pathogen killing, and can be used as a therapeutic target to treat otherwise lethal pneumonia.
13675	TLR6	9606	25456159	Cutaneous bacteria can negatively regulate skin-driven immune responses by inducing Gr1(+)CD11b(+) myeloid-derived suppressor cells via TLR2-6 activation.
206490	Cxcr6	10090	25456160	Cxcl16-Cxcr6 crosstalk coordinates the intestinal topography of Il22 secretion required for mucosal defence against Citrobacter rodentium infection.
194380	Cxcl16	10090	20874518	Cxcl16 is a chemoattractant in cerebrospinal fluid in early pneumococcal meningitis where Cxcl16 was found to be upregulated in RAW264.7 macrophages (but not in neutrophils and endothelial cells) upon pneumococcal stimulation. Cxcl16 upregulation in vivo was dependent on Toll-like receptor (TLR) 2/TLR4 and MyD88 signaling.
194380	Cxcl16	10090	25456160	Cxcl16-Cxcr6 crosstalk coordinates the intestinal topography of Il22 secretion required for mucosal defence against Citrobacter rodentium infection.
6012	DEFA6	9606	19024344	DEFA6 (HD-6) and DEFA5 (HD-5) are two Paneth cell alpha-defensins found in the gut and alpha-defensins have multiple functions in the immune system.
6012	DEFA6	9606	21560070	DEFA6 is secreted by paneth cells in the small intestine and is secreted in response to cholinergic and microbial stimuli. DEFA5A confer immunity to oral infection by Salmonella and is a major determinant of the small intestinal microbiome composition.
6012	DEFA6	9606	22722251	DEFA6 is involved in mucosal innate immunity by protecting the small intestine against invasion by diverse enteric pathogens. In response to bacterial surface proteins, DEFA6 undergoes ordered self-assembly to form fibrils and nanonets that surround and entangle bacteria.
6012	DEFA6	9606	25433720	NOD2 plays a role in intestinal innate immunity by regulating the expression of DEFA5 and DEFA6 through the NF-kB and MAPK pathways.
6199	DEFA5	9606	19024344	DEFA5 and DEFA6 are two Paneth cell alpha-defensins found in the gut that have multiple functions in the immune system.
6199	DEFA5	9606	21468224	DEFA5 expression in mice showed significant loss of segmented filamentous bacteria, thus demonstrating a novel role for Paneth cell defensins in intestinal homeostasis by regulating the small intestinal microbiome.
6199	DEFA5	9606	21560070	DEFA5 is secreted by paneth cells in the small intestine and is secreted in response to cholinergic and microbial stimuli. DEFA5A confer immunity to oral infection by Salmonella and is a major determinant of the small intestinal microbiome composition.
6199	DEFA5	9606	25433720	NOD2 plays a role in intestinal innate immunity by regulating the expression of DEFA5 and DEFA6 through the NF-kB and MAPK pathways.
30654	NOD2	9606	17690884	NOD2 and NOD1 represent central players in the control of the immune responses to bacterial infections and inflammation.
30654	NOD2	9606	18240302	NOD2 is an intracellular receptor of muramyl dipeptide (MDP), a component of peptidoglycan present in the cell wall of Gram-positive (G+) and Gram-negative (G-) bacteria.
30654	NOD2	9606	17705131	NOD2 and NOD1 can induce CCL5 (RANTES) through NF-kappaB pathway, orchestrating the global Nod-dependent immune defence during bacterial infections.
30654	NOD2	9606	19541630	NOD2-dependent recognition of S. aureus and muramyl dipeptide is facilitated by alpha-toxin (alpha-hemolysin), a pore-forming toxin and virulence factor of the pathogen and is dependent on IL-1beta-amplified production of IL-6.
30654	NOD2	9606	19898471	NOD2 and NOD1 direct autophagy by recruiting ATG16L1 to the plasma membrane at the site of bacterial entry.
30654	NOD2	9606	19966812	NOD2 stimulation induces autophagy in dendritic cells influencing bacterial handling and antigen presentation.
30654	NOD2	9606	20200479	NOD2 recruits the critical autophagy protein ATG16L1 to the plasma membrane during bacterial invasion.
30654	NOD2	9606	19701189	NOD2 functions as a cytoplasmic viral pattern-recognition receptor (PRR) and activates an innate immune responses to viral ssRNA by triggering activation of interferon-regulatory factor 3 (IRF3) and production of interferon-beta (IFNB1).
30654	NOD2	9606	21199260	NOD2 is both a positive and negative regulator of TLR4 - the effect it exerts is dependent on the presence of MDP. NOD2 upon engagement with its ligand, MDP, positively regulates TLR4-mediated signalling; in the absence of MDP, NOD2 negatively regulates the TLR4 pathway. (Demonstrated in murine model)
30654	NOD2	9606	21236705	NOD2 is a peripheral peptidoglycan intracellular sensor and is important for the progression and pathogenesis of experimental autoimmune encephalomyelitis (animal model of multiple sclerosis).
30654	NOD2	9606	21108472	NOD2 detects heat-killed Legionella pneumophila and stimulates NFkB and IFN-beta promoter activity. NOD2 deficiency results in increased proinflammatory cytokine expression at 4hrs and greater neutrophil recruitment to the lung. (Demonstrated in murine model)
30654	NOD2	9606	21690088	DDX58 and NOD2 colocalize to cellular ruffles and cell-cell junctions to form a protein complex via the CARD domains. DDX58 negatively regulates ligand-induced NFkB signalling mediated by NOD2, and conversely, NOD2 negatively regulates type I interferon induction by DDX58.
30654	NOD2	9606	22750073	NOD2 recognition of muramyl dipeptide, a component of bacterial cell walls, improves the barrier function of intestinal epithelial cells. (Demonstrated in mice)
30654	NOD2	9606	22531915	NOD2 enhances the innate immune response of alveolar macrophages to Mycobacterium tuberculosis in human.
30654	NOD2	9606	24670424	Following NOD2 activation, IRF4 interacts with MYD88, TRAF6, and RIPK2 and downregulates K63-linked polyubiquitinylation of RICK and TRAF6 leading to disruption of NFkB activation pathways.
30654	NOD2	9606	25433720	NOD2 plays a role in intestinal innate immunity by regulating the expression of DEFA5 and DEFA6 through the NF-kB and MAPK pathways.
148186	Il1r2	10090	25461404	Adam17 affects sensitivity to interleukin-1 by changing the balance between Il1r1 and Il1r2 receptors.
148254	Il1r1	10090	22426547	Il1r1 is the primary receptor for the inflammatory cytokine Il1b. (Demonstrated in human)
148254	Il1r1	10090	23440414	IL1R1 upregulates Mir135b as a negative feedback regulatory mechanism to resolve cigarette smoke-induced inflammation in the lung.
148254	Il1r1	10090	24651866	In response to adenovirus infection, the IL1A-IL1R1-CXCR2 signalling axis cooperates with complement to recruit Ly-6G+7/4+ polymorphonuclear leukocytes to the splenic marginal zone (MZ) in the proximity of virus-containing MARCO+ residential MZ macrophages, which are subsequently eliminated.
148254	Il1r1	10090	25461404	Adam17 affects sensitivity to interleukin-1 by changing the balance between Il1r1 and Il1r2 receptors.
130508	Adam17	10090	25461404	Adam17 affects sensitivity to interleukin-1 by changing the balance between Il1r1 and Il1r2 receptors.
42125	IRF1	9606	12759449	IRF1 is required for the up-regulation of the CD40-NF-kappaB activator 1 (TRAF3IP2 ) axis during airway inflammation.
42125	IRF1	9606	12420214	IRF1 is controlled by two distinct signalling pathways; a JAK/STAT-signalling pathway in viral infected cells and an ATM-signalling pathway in DNA damaged cells.
42125	IRF1	9606	3409321	IRF1 specifically binds to the upstream regulatory region of the human IFN-beta (IFNB1) gene and mediates IFNB1 virus-induced transcription and is involved in the regulation of other genes such as IFN-alpha and MHC class I genes.
42125	IRF1	9606	20308629	IRF1 mediated type I IFN independent mechanism of enhanced RSAD2 (viperin) expression provides a redundant mechanism to protect cells from viral infections.
42125	IRF1	9606	21097874	IRF1 transcriptionally inhibits the IL23A through the ISRE element and reduce the severity of chronic intestinal inflammation caused by LPS (shown in mice).
42125	IRF1	9606	22266972	IRF1 promotes immune cell apoptosis and inhibits autophagy in a murine endotoxemia model. (Demonstrated in mice)
42125	IRF1	9606	25461762	MIR23A contributes to human herpes simplex virus type 1 replication through the regulation of the IRF1-mediated antiviral signal pathway.
126931	MIR23A	9606	25461762	MIR23A contributes to human herpes simplex virus type 1 replication through the regulation of the IRF1-mediated antiviral signal pathway.
171492	Il15	10090	22084435	Il15 regulates homeostasis and terminal maturation of NKT cells.
171492	Il15	10090	22940097	IL15 secreted by inflammatory monocytes is critical for the differentiation of memory CD8(+) T and NK lymphocytes into antimicrobial effector cells.
171492	Il15	10090	25466888	Cxcr3 expression in innate CD8+ T cells defines protective antibacterial and cancer immunity upon Il15 stimulation.
197156	Il28ra	10090	25431490	Il28ra (Ifnlr1), Stat1 and Irf3 are required for antibiotics to prevent persistent murine norovirus infection.
197890	Nlrc4	10090	22174673	The Nlrc4 inflammasome is important for control of mucosal Candida infection, impacting on inflammatory cell recruitment to infected tissues, as well as protecting against the systemic dissemination of infection.
197890	Nlrc4	10090	22231517	Flagellin-induced Nlrc4 inflammasome activation in splenic dendritic cells triggers antigen-independent IFN-gamma production by memory T cells.
197890	Nlrc4	10090	22547706	Nlrc4 is important for host survival and bacterial clearance, as well as neutrophil-mediated inflammation in the lungs following Klebsiella pneumoniae infection.
197890	Nlrc4	10090	22484733	Nlrc4-dependent production of Il1b by intestinal phagocytes is a mechanism that discriminates pathogenic from commensal bacteria in the intestinal host defence.
197890	Nlrc4	10090	22885697	Nlrc4 Serâ533 phosphorylation is essential for procaspase-1 recruitment to the Nlrc4 inflammasome complex after S. typhimurium infection.
197890	Nlrc4	10090	23355222	Microglial cells employ the NAIP5/NLRC4 inflammasome to monitor and clear central nervous system infections by flagellated bacteria.
197890	Nlrc4	10090	25395539	Flagellin induces Tlr5-dependent Il22 production and Nlrc4-dependent Il18 production to promote a protective gene expression program in intestinal epithelial cells and elimination of rotavirus-infected cells.
197890	Nlrc4	10090	25422455	Actin polymerization is required for Nlrc4-dependent regulation of intracellular bacterial burden, inflammasome assembly, pyroptosis, and Il1b production.
149298	Nod1	10090	17705131	Nod1 and Nod2 activation results in substantial secretion of Ccl5 by murine macrophages and induces binding of NF-kappaB subunits to Ccl5 promoter.
149298	Nod1	10090	20389019	Nod1 can activate the ISGF3 signaling pathway that is usually associated with protection against viral infection to provide mice with robust type I IFN-mediated protection from H. pylori and possibly other mucosal infections.
149298	Nod1	10090	20685341	Nod1 and Nod2 account for neutrophil recruitment to the lungs of mice infected with Legionella pneumophila.
149298	Nod1	10090	21072876	Nod1 and Nod2 can detect Legionella pneumophila and these receptors modulate the in vivo pulmonary immune response differently.
149298	Nod1	10090	21236705	Nod1 is a peripheral peptidoglycan intracellular sensor and is important for the progression and pathogenesis of experimental autoimmune encephalomyelitis (animal model of multiple sclerosis).
149298	Nod1	10090	21108472	Nod1 detects heat-killed Legionella pneumophila and stimulates NFkB and IFN-beta promoter activity. Nod1 deficiency results in impaired bacterial clearance and increased proinflammatory cytokine at 24hrs post-infection.
149298	Nod1	10090	21677137	Nod1 is expressed by trophoblast cells across gestation and may have a role in mediating infection-associated inflammation and prematurity. Activation of Nod1 by bacterial peptidoglycan-derived peptide induces maternal-fetal inflammation and preterm labour.
149298	Nod1	10090	21715553	Nod1 KO mice were protected from high-fat diet induced inflammation, lipid accumulation, and peripheral insulin intolerance. Ex vivo, Nod1 activation by bacterial peptidoglycan mimetics induces proinflammatory cytokine secretion and impaired insulin-stimulated glucose uptake in adipocytes. Hence, Nod1 is a plausible, new link between innate immunity and metabolism.
149298	Nod1	10090	24163408	Nod1 and Nod2 synergize with Tlr4 in dendritic cells to increase IL12 production and enhance invariant natural killer T (iNKT) cell activation, and are important regulators of the IFN gamma response by iNKT cells during S. typhimurium and L. monocytogenes infections.
149298	Nod1	10090	25423082	Salmonella enterica serovar Typhimurium ÎmsbB that possesses a modified lipid A triggers exacerbated colitis in the absence of Nod1 and/or Nod2, which is likely due to increased Tlr2 stimulation.
3485	SMAD4	9606	25410655	TGF-Î² signalling upregulates MIR181A2 expression through SMAD3/4-dependent promoter activation.
18366	SMAD3	9606	25410655	TGF-Î² signalling upregulates MIR181A2 expression through SMAD3/4-dependent promoter activation.
126715	MIR181A2	9606	25410655	TGF-Î² signalling upregulates MIR181A2 expression through SMAD3/4-dependent promoter activation.
87415	LCN2	9606	25398327	LCN2 is secreted by the urinary tract mucosa in response to uropathogenic E. coli challenge and acts in innate immune defences as a colonization barrier.
168769	Tyrobp	10090	25402298	Tyrobp impairs host defence during pneumococcal pneumonia at the primary site of infection by inhibiting phagocytosis by alveolar macrophages.
151419	Relb	10090	21419662	Relb is required for Il17a production in T cell in response to bacterial infection. Relb deficient T cells resulted in a diminished innate immune response to E. coli infection.
151419	Relb	10090	25367573	Ripk3 has a novel function in NF-kB activation, dendritic cell biology, innate inflammatory-cytokine expression, and injury-induced tissue repair.
195445	Nfkb1	10090	21343618	Nfkb1 enforces specificity of cellular response to pathogens by binding to a subset of IRE sequences in IFN-inducible genes. Nfkb1 deficiency results in the inappropriate production of Ifnb in response to bacterial DNA sensed by Tlr9.
195445	Nfkb1	10090	24270517	Mir126-Kdr axis is an important regulator of the innate response. Mir126 controls the survival and function of plasmacytoid dendritic cells and regulates gene expression of Tlr7, Tlr9, Nfkb1 and Kdr.
195445	Nfkb1	10090	25367573	Ripk3 has a novel function in NF-kB activation, dendritic cell biology, innate inflammatory-cytokine expression, and injury-induced tissue repair.
165974	Ripk3	10090	22123964	Ripk3 forms a complex with Ticam1 upon Toll-like receptors (TLR) 3 and 4 activation resulting in Ripk3-dependent but TNF-independent necrosis in macrophages.
165974	Ripk3	10090	22423968	Ripk3 interacts with Zbp1 to mediate virus-induced necrosis.
165974	Ripk3	10090	25367573	Ripk3 has a novel function in NF-kB activation, dendritic cell biology, innate inflammatory-cytokine expression, and injury-induced tissue repair.
75609	ATF2	9606	25368329	SCN5A is a novel pathogen sensor that initiates anti-viral signalling and transcription through ADCY8 and ATF2.
35780	ADCY8	9606	25368329	SCN5A is a novel pathogen sensor that initiates anti-viral signalling and transcription through ADCY8 and ATF2.
26059	SCN5A	9606	25368329	SCN5A is a novel pathogen sensor that initiates anti-viral signalling and transcription through ADCY8 and ATF2.
29564	ECSIT	9606	10465784	ECSIT is specific for the Toll/IL-1 pathways and is a regulator of MAP3K1 (MEKK1) processing.
29564	ECSIT	9606	25371197	ECSIT binds to MAP3K7 and TRAF6 to form a complex that plays a pivotal role in activating TLR4-mediated NF-kB signalling.
166877	Slc11a1	10090	25350459	Slc11a1 confers temporal and anatomical host resistance to chronic Salmonella infection.
74471	USP2	9606	25070846	USP2 deubiquitinates K63-linked polyubiquitin chains from TBK1 to terminate TBK1 activation and negatively regulate IFNB1 signalling and antiviral immune response.
139889	Prl	10090	25049387	Pituitary hormone prolactin (Prl) constrains tumor-promoting liver inflammation by inhibiting Map3k1-dependent activation of Myc at the level of the trafasome.
144556	Myc	10090	25049387	Pituitary hormone prolactin (Prl) constrains tumor-promoting liver inflammation by inhibiting Map3k1-dependent activation of Myc at the level of the trafasome.
96496	ARG1	9606	18978793	ARG1 expression induced by intracellular pathogens in mouse classically activated macrophages (CAMs) through the TLR pathway, suppressing nitric oxide production and thwarting effective immunity independent of the STAT6 pathway.
96496	ARG1	9606	25015834	PI3K/PTEN-regulated extracellular ARG1 acts as a paracrine regulator of inflammation and immunity. Demonstrated in mice.
81409	PTEN	9606	25015834	PI3K/PTEN-regulated extracellular ARG1 acts as a paracrine regulator of inflammation and immunity. Demonstrated in mice.
133881	Pik3cg	10090	25022365	Rab8a interacts with Pik3cg to regulate Akt signalling generated by surface Tlr4.
167493	Rab8a	10090	25022365	Rab8a interacts with Pik3cg to regulate Akt signalling generated by surface Tlr4.
77617	STAT1	9606	17971840	STAT1 mediates IFNG cytokine signalling, and as a member of the STAT family protein, STAT1 has a significant impact on the innate immunity during sepsis.
77617	STAT1	9606	18678606	STAT1 serine phosphorylation is induced by TNF-alpha and PGE2 and this activates expression of the STAT1 and NF-kappaB target gene IFN regulatory factor 1 (IRF1), which contributes to IFN responses.
77617	STAT1	9606	7657660	STAT1 phosphorylation and DNA binding activity is under the control of Janus protein-tyrosine kinases (JAKs) and the epidermal growth factor receptor (EGFR).
77617	STAT1	9606	16481475	Acetylation of STAT1 modulates NF-kappaB activity and thus ultimately apoptosis where, as a result, RELA DNA binding, nuclear localization, and expression of anti-apoptotic NF-kappaB target genes decrease.
77617	STAT1	9606	8943351	STAT1 is part of the interferon-stimulated gene factor 3 (ISGF3) transcription complex which is composed of a STAT1:2 heterodimer and a weak DNA-binding protein, IRF9.
77617	STAT1	9606	20829351	STAT1 transcription factor enhances TLR8 functionality by binding of to GAS elements on the TLR8 promoter in an IFN-gamma-dependent manner.
77617	STAT1	9606	22065572	STAT1 phosphorylation at Ser708 is a key event in the IFN signalling pathway that imparts anti-viral immunity to restrict West Nile virus infection. (Demonstrated in mice)
77617	STAT1	9606	22425562	Histone deacetylase inhibitors prevent IFNG-mediated phosphorylation of STAT1.
77617	STAT1	9606	24449862	TNK1 is a component of the IFN-JAK-STAT signalling cascade and is a critical antiviral host factor where its abundance is inversely correlated to viral replication and contributes to the hepatocytic response to antiviral treatment.
77617	STAT1	9606	25027037	STAT1 is directly recruited to TRAF6, demonstrating cross-talk between the TLR and JAK/STAT signalling pathways, and this direct activation of STAT1 by TLR signalling suggests a crucial role for STAT1 in TLR-induced inflammation. Demonstrated in mice.
41523	PRKX	9606	25028512	MAP3K7 (TAK1) Ser412 phosphorylation is regulated by PRKACA and PRKX, and is essential for proper signalling, as well as proinflammatory cytokine induction by TLR/IL-1R activation.
32929	PRKACA	9606	25028512	MAP3K7 (TAK1) Ser412 phosphorylation is regulated by PRKACA and PRKX, and is essential for proper signalling, as well as proinflammatory cytokine induction by TLR/IL-1R activation.
189693	S1pr1	10090	25024218	T-cell-intrinsic Mir155 is required for type-2 immunity, in part through regulation of S1pr1, whereas T-cell-intrinsic Mir146 is required to prevent overt Th1/Th17 skewing.
24257	CXCL2	9606	21757770	CXCL2 is a chemokine secreted by kidney dendritic cells to recruit neutrophils to sites of uropathogenic bacterial infection. (Demonstrated in mouse)
24257	CXCL2	9606	25005359	Secreted CCNA2 (CCN1) promotes anti-inflammatory cytokine IL10 release from epithelial cells via integrin Î±VÎ²6-PKC, and this subsequently suppresses TNF, CXCL2 and neutrophil infiltration in the lungs.
36372	CCNA2	9606	25005359	Secreted CCNA2 (CCN1) promotes anti-inflammatory cytokine IL10 release from epithelial cells via integrin Î±VÎ²6-PKC, and this subsequently suppresses TNF, CXCL2 and neutrophil infiltration in the lungs.
126971	MIR124-1	9606	24995397	MIR124-1 plays a negative regulatory role in fine-tuning the inflammatory response in alveolar macrophages upon mycobacterial infection, in part by directly targetting TLR signalling.
66003	PIK3CA	9606	17827709	PIK3CA, as the alpha subunit of PI3K, functions as a negative regulator of TLR signalling. The activation of PIK3CA results in the inhibition of pro-inflammatory events such as expression of IL12 and TNFA.
66003	PIK3CA	9606	20953381	PIK3CA and PIK3CB isoforms of class IA phosphatidylinositol 3-kinase (PI3K) are both required for the pro-inflammatory response to flagellin.
66003	PIK3CA	9606	24996183	MIR203A accelerates apoptosis in LPS-stimulated alveolar epithelial cells by targeting PIK3CA.
126601	MIR203	9606	22917968	MIR203A post-transcriptionally regulate the pro-inflammatory cytokines TNFalpha and IL24 in keratinocytes.
126601	MIR203	9606	23785202	MIR203A can be induced by IFN in virally infected cells to dampen IFN anti-viral signalling.
126601	MIR203	9606	24996183	MIR203A accelerates apoptosis in LPS-stimulated alveolar epithelial cells by targeting PIK3CA.
189794	Trem1	10090	21555403	Trem1 expression is upregulated following Pseudomonas aeruginosa infection in the cornea and the inhibition of Trem1 reduces the severity of corneal disease. Trem1 acts as an inflammatory amplifier in P. aeruginosa keratitis by modulating TLR signalling and Th1/Th2 responses.
189794	Trem1	10090	21690199	Trem1 expression is induced by vitamin D3 in human bronchial epithelial cells. Activation of TREM1 leads to the induction of human beta defensin 2 and TNF-alpha mRNA in the airway epithelium. (Demonstrated in human)
189794	Trem1	10090	22459945	Trem1 mediates endotoxin tolerance in monocytes through its ability to induce anti- or pro-inflammatory signals depending on its membrane-bound state. (Demonstrated in human)
189794	Trem1	10090	24752755	Trem1 offers protective innate immunity during pneumococcal pneumonia by enhancing the early immune response of alveolar macrophages.
73653	SAMHD1	9606	21720370	SAMHD1 is specifically targeted for degradation by human immunodeficiency virus 1 (HIV-1) viral protein VPX, and mutations in SAMHD1 causes Aicardi-Goutieres syndrome, which mimics symptoms of congenital viral infection.
73653	SAMHD1	9606	21613998	SAMHD1 is expressed in dendritic and myeloid cells and acts as an anti-retroviral protein that inhibits the early stages of the viral life cycle. Silencing of SAMHD1 leads to significant accumulation of human immunodeficiency virus 1 (HIV-1) DNA in infected cells.
73653	SAMHD1	9606	22327569	SAMHD1 inhibits HIV replication by depleting intracellular dNTPs, which are required for viral reverse transcriptase to synthesize viral DNA.
73653	SAMHD1	9606	24753578	Full activation of SAMHD1 involves ordered binding of GTP and substrate dNTPs to activator and substrate sites on the enzyme.
166395	Cxcr2	10090	24651866	In response to adenovirus infection, the IL1A-IL1R1-CXCR2 signalling axis cooperates with complement to recruit Ly-6G+7/4+ polymorphonuclear leukocytes to the splenic marginal zone (MZ) in the proximity of virus-containing MARCO+ residential MZ macrophages, which are subsequently eliminated.
166395	Cxcr2	10090	24755316	Fibrates protect against bacteriaâinduced sepsis by inhibiting LPSâmediated ERK phosphorylation and the expression of Adrbk1 (GRK2), thereby preventing Cxcr2 down-regulation on neutrophils.
129419	Adrbk1	9606	24755316	Fibrates protect against bacteriaâinduced sepsis by inhibiting LPSâmediated ERK phosphorylation and the expression of Adrbk1 (GRK2), thereby preventing Cxcr2 down-regulation on neutrophils.
126375	MIR122	9606	23580661	Circulating MIR122 activates natural killer cells via the TLR1 signalling pathway.
126375	MIR122	9606	24672032	Reduction of MIR122 expression may play a role in the progression of fibrosis in patients with chronic hepatitis C.
127039	hsa-mir-146a	9606	19840932	MIR146A is critical for in vitro monocytic cell-based endotoxin tolerance.
127039	hsa-mir-146a	9606	16885212	MIR146A is involved in control of Toll-like receptor and cytokine signaling through a negative feedback regulation loop involving down-regulation of IL-1 receptor-associated kinase 1 (IRAK1) and TNF receptor-associated factor 6 (TRAF6) protein levels.
127039	hsa-mir-146a	9606	18801740	MIR146A-mediated and NF-kappaB-sensitive inflammatory circuit was found in Alzheimer disease and in stressed human brain cells.
127039	hsa-mir-146a	9606	19021527	MIR146A expression is driven by the transcription factor NF-kappaB and changes in the expression of hsa-mir-146a have been implicated in both the development of multiple cancers and in the negative regulation of inflammation induced via the innate immune response.
127039	hsa-mir-146a	9606	19021527	MIR146A negatively regulates the IL-1-beta-induced release of chemokines IL-8 and RANTES.
127039	hsa-mir-146a	9606	19333922	MIR146A negatively regulates the type I IFN pathway by directly targeting IRF5 and STAT1.
127039	hsa-mir-146a	9606	19596990	MIR146A feedback inhibits RIG-I-dependent type I IFN production in macrophages by targeting TRAF6, IRAK1, and IRAK2.
127039	hsa-mir-146a	9606	20616571	MIR146A significantly increases after 24 h stimulation in monocytes from neonate cord blood compared to those derived from adults, suggesting the involvement of microRNA in immune regulation of the innate immune system of neonates.
127039	hsa-mir-146a	9606	20937840	MIR146A-mediated down-regulation of IRAK-1 coupled to an NF-ÎºB-induced up-regulation of IRAK-2 expression drives an extensively sustained inflammatory response.
127039	hsa-mir-146a	9606	20951969	MIR146A mediates the intestinal epithelial innate immune tolerance during the neonatal period, characterizing tolerance as an active condition involved in the establishment of intestinal mucosal homeostasis.
127039	hsa-mir-146a	9606	21329689	MIR146A negatively regulates both oxidized low-density lipoprotein accumulation and the inflammatory response in macrophages by inhibiting TLR4 and the activation of TLR4-dependent signalling pathways.
127039	hsa-mir-146a	9606	21469088	MIR146A is highly expressed in patients with Sjogren's syndrome and was found to increase the phagocytic activity and suppressing the inflammatory cytokine production in human monocytes.
127039	hsa-mir-146a	9606	21652514	MIR146A transcription is induced by NFkB in response to stimulations such as LPS, TNF-alpha and IL1B. MIR146A targets TRAF6 and IRAK1 and act s as a negative regulator fine-tuning the immune response.
127039	hsa-mir-146a	9606	22545247	MIR146A directly targets RELB to modulate the amplitude of monocyte response to inflammatory challenges.
127039	hsa-mir-146a	9606	22593544	MIR146A is a mechanosensitive miRNA that modulates mechanotransduction and pressure-induced inflammation in small airway epithelium.
127039	hsa-mir-146a	9606	22363497	MIR146A is overexpressed during prion disease and modulates the innate immune response and the microglial activation state. (Demonstrated in mice)
127039	hsa-mir-146a	9606	22822053	MIR146A is upregulated in lung cells in response to infection with influenza A virus.
127039	hsa-mir-146a	9606	23028621	MIR146A is a key regulator of astrocyte-mediated inflammation responses in neurological disorders.
127039	hsa-mir-146a	9606	23143987	MIR146A alleviates ischemia-induced inflammation in the small intestine by downregulating IRAK1.
127039	hsa-mir-146a	9606	23343627	In the course of influenza A infection MIR146A transcription increases to limit viral propagation.
127039	hsa-mir-146a	9606	23733368	MIR146A targets components of the NF-kB and EGR pathways to repress inflammation.
127039	hsa-mir-146a	9606	24670381	MIR146A is a potent negative regulator of the innate immune response in keratinocytes through downregulation of the IRAK1/TRAF6/NFÎºB pathway.
27941	RIPK2	9606	17277144	RIPK2 functions in innate immunity by mediating NOD1 and NOD2 signalling but not TLR-mediated immune responses.
27941	RIPK2	9606	18079694	RIPK2 polyubiquitination mediates the recruitment of MAP3K7 (TAK1) and the subsequent activation of NF-kappaB signalling via IKK complex in NOD signalling.
27941	RIPK2	9606	18342009	RIPK2 deubiquitination by TNFAIP3 (A20) restricts NF-kappaB activation via NOD2 signalling.
27941	RIPK2	9606	18775659	RIPK2 is sequestered by MAP3K4 to inhibit the NOD2:RIPK2 complex from activating NF-kappaB signalling pathways.
27941	RIPK2	9606	21236705	RIPK2 is a downstream adaptor molecule in the NOD1/2 signaling pathway and is important for the progression and pathogenesis of experimental autoimmune encephalomyelitis (animal model of multiple sclerosis). RIPK2 was found to be critical for the activation of CNS-infiltrating dendritic cells.
27941	RIPK2	9606	21469090	RIPK2 is essential for NOD1 and NOD2-signalling upon recognition of bacterial peptidoglycan. RIPK2 is crucial for inflammatory cytokine secretion, activation and recruitment of macrophage and neutrophils as well as the capacity to activate the adaptive immune response. (Demonstrated in murine model)
27941	RIPK2	9606	24670424	Following NOD2 activation, IRF4 interacts with MYD88, TRAF6, and RIPK2 and downregulates K63-linked polyubiquitinylation of RICK and TRAF6 leading to disruption of NFkB activation pathways.
55681	IRF4	9606	12566414	IRF4 participates in the regulation of lymphoid cell apoptosis by modulating the efficiency of the Fas-mediated death signal.
55681	IRF4	9606	16272311	IRF4 provides a positive feedback signal for its own gene expression in dendritic cells (DCs) and the expression of IRF4 mRNA, but not of other IRFs, is specifically up-regulated during DC differentiation.
55681	IRF4	9606	24670424	Following NOD2 activation, IRF4 interacts with MYD88, TRAF6, and RIPK2 and downregulates K63-linked polyubiquitinylation of RICK and TRAF6 leading to disruption of NFkB activation pathways.
193159	Il20rb	10090	24677051	Astrocytes produce IL19 and express IL19 receptors (Il20ra and Il20rb) in response to bacterial pathogens. IL19 can significantly attenuate bacterially induced inflammatory astrocyte responses
136067	Il20ra	10090	24677051	Astrocytes produce IL19 and express IL19 receptors (Il20ra and Il20rb) in response to bacterial pathogens. IL19 can significantly attenuate bacterially induced inflammatory astrocyte responses
190663	Il19	10090	24677051	Astrocytes produce IL19 and express IL19 receptors (Il20ra and Il20rb) in response to bacterial pathogens. IL19 can significantly attenuate bacterially induced inflammatory astrocyte responses
157032	Ptges	10090	21497116	Ptges (prostaglandin E2) is produced by LPS-primed macrophages upon treatment with silica crystal and aluminum salts, and is important for the production of IgE in Th2 cells.
157032	Ptges	10090	24726877	Influenza A virus infection targets the Ptges and prostaglandin E2 pathway to evade host type I IFN-dependent antiviral immunity
82567	MFF	9606	24733894	Hepatitis C infection stimulates the expression of DNM1L and MFF and promotes DNM1L recruitment to mitochondria by stimulating the phosphorylation of DNM1L, leading to mitochondrial fission.
26348	DNM1L	9606	24733894	Hepatitis C infection stimulates the expression of DNM1L and MFF and promotes DNM1L recruitment to mitochondria by stimulating the phosphorylation of DNM1L, leading to mitochondrial fission.
36619	BST2	9606	19564354	BST2 directly binds to purified LILRA4 (ILT7) protein, initiates signalling via the ILT7-FcepsilonRIgamma complex, and strongly inhibits production of IFN and pro-inflammatory cytokines in plamsmacytoid dendritic cells
36619	BST2	9606	20702620	BST2 (CD317) is a broadly acting and conserved mediator of innate control of retroviral infection and pathogenesis that restricts the release of retroviruses and lentiviruses in rodents by limiting replication of HIV-1 and MLV.
36619	BST2	9606	21734563	BST2 is an innate intracellular HIV restriction factor that is upregulated by type I interferons.
36619	BST2	9606	22072710	BST2 is a broad spectrum effector of the innate immune response to viral infection. BST2 is antagonized by the human immunodeficiency virus (HIV) Vpu protein to evade innate immune system detection.
36619	BST2	9606	24733916	HIV-1 viral protein U, Vpu, protects HIV-infected cells from antibody-dependent cell-mediated cytotoxicity as a function of its ability to counteract BST2 (tetherin).
221396	Mir302b	10090	24717937	Mir302b expression is up-regulated upon bacterial infection and is a crucial regulator of NFÎºB signalling by directly targeting IRAK4
62183	MAPK9	9606	19153595	MAPK9 phosphorylates IRF3 and is essential for IRF3 dimerization induced by polyinosinic-cytidylic acid (polyI:C).
62183	MAPK9	9606	24651600	Upon viral infection, MAVS recruits MKK7 onto mitochondria, leading to the induction of apoptosis by MAP2K7 activated MAPK9
24000	MAP2K7	9606	24651600	Upon viral infection, MAVS recruits MKK7 onto mitochondria, leading to the induction of apoptosis by MAP2K7 activated MAPK9
172199	Il5	9606	24631157	Chitin induces IL25, IL33, and TSLP which are required to stimulate ILC2 production of IL5 and IL13. IL5 and IL13, in turn, are required for the accumulation of eosinophils and alternatively activated macrophages that are associated with allergy.
172064	Il13	10090	22154382	Il13 dampens the innate immune response in airway epithelial cells via Irak3-mediated inhibition of Tlr2 signalling. (Demonstrated in human)
172064	Il13	10090	24613091	IL13 produced by activated innate lymphoid cells type 2 (ILC2s) is critical for promoting the migration of activated lung dendritic cells to the draining lymph node, and in the differentiation of naive CD4+ T cells into Th2 cells
180637	Kdm4a	9606	24656046	The noncanonical NFÎºB pathway regulates histone modifications at the Ifnb1 promoter resulting in attenuated recruitment of Rela and histone demethylase, Kdm4a, to the Ifnb1 promoter. This provides a mechanism for regulating the induction of type I interferons .
155240	Vegfc	10090	24656836	Flt4 signalling represents a negative feedback mechanism by immune cells to overreacting during bacterial infection; ligation of Flt4 by Vegfc reduces TLR4-triggered production of proinflammatory cytokines in macrophages.
167138	Flt4	9606	24656836	Flt4 signalling represents a negative feedback mechanism by immune cells to overreacting during bacterial infection; ligation of Flt4 by Vegfc reduces TLR4-triggered production of proinflammatory cytokines in macrophages.
45463	VEGFC	9606	24656836	FLT4 signalling represents a negative feedback mechanism by immune cells to overreacting during bacterial infection; ligation of FLT4 by VEGFC reduces TLR4-triggered production of proinflammatory cytokines in macrophages.
62355	FLT4	9606	24656836	FLT4 signalling represents a negative feedback mechanism by immune cells to overreacting during bacterial infection; where ligation of FLT4 by VEGFC reduces TLR4-triggered production of proinflammatory cytokines in macrophages.
195914	Nlrp1a	9606	24549849	Both Nlrp3 and Nlrp1a are important regulators of Toxoplasma proliferation and IL18 signaling is required to mediate host resistance to acute toxoplasmosis.
191058	Hdac1	10090	24550390	Daxx interacts with Hdac1 and represses the transcription of Il6 in TLR-triggered macrophages.
168138	Daxx	10090	24550390	Daxx interacts with Hdac1 and represses the transcription of Il6 in TLR-triggered macrophages.
164545	Il12b	10090	22888135	Il12, consisting of Il12a and Il12b subunits, induces Il2ra to form high-affinity Il2 receptors on natural killer cells in response to mouse cytomegalovirus infection.
164545	Il12b	10090	24163408	Nod1 and Nod2 synergize with Tlr4 in dendritic cells to increase IL12 production and enhance invariant natural killer T (iNKT) cell activation, and are important regulators of the IFN gamma response by iNKT cells during S. typhimurium and L. monocytogenes infections.
25212	CXCL10	9606	21124994	CXCL10 exert direct antimicrobial effects in vitro against Bacillus anthracis spore and bacilli in a receptor-independent manner and contributes to pulmonary innate immunity. (Demonstrated in murine model)
25212	CXCL10	9606	21518789	CXCL10 concentration in blood increases during neonatal polymicrobial sepsis, and the blockade of CXCL10 not only worsens recruitment and phagocytic function of macrophages, but also the survival of neonatal mice. (Demonstrated in murine model)
25212	CXCL10	9606	23998932	MIR21 inhibition enhances CCL5 (RANTES) and CXCL10 (IP-10) release in MCF-7 cancer cells and resulted in increased lymphocyte migration . PIAS3 is a target of MIR21 in MCF-7 cells.
25212	CXCL10	9606	24448099	ISG15 does not directly alter human rhinovirus replication but modulates immune signalling via the viral sensor protein DDX58 to impact production of CXCL10, which has been linked to innate immunity to viruses.
25212	CXCL10	9606	24448099	Human rhinovirus infection of epithelial cells induces the expression and secretion of ISG15, which modulates immune responses via effects on DDX58, and by regulating CXCL10 production.
148617	Prdm1	10090	24477914	Prdm1 (Blimp1) modulates host defences by suppressing Ccl8-induced inflammation.
5777	MYH9	9606	24489676	The calpain-MYH9-RAB7B axis regulates TLR4 containing alpha-granules trafficking in thrombin-stimulated platelets.
49631	HNRNPL	9606	24371310	THRIL, a large intergenic noncoding RNA, binds to heterogenous nuclear ribonucleoprotein L (HNRNPL) and forms a functional THRIL-HNRNPL complex that regulates transcription of TNF by binding to its promoter.
81960	IFIT1	9606	20386592	IFIT1 expression activates the IFN response during C. pneumoniae infection, mediated by intracellular nucleotide-sensing pattern recognition receptors (PRRs), which operate through a mechanism dependent on the bacterial type III secretion system (T3SS).
81960	IFIT1	9606	21642987	IFIT1 recognizes and directly binds to 5'-triphosphate RNA and functions as an innate inhibitor of viral replication and pathogenicity. (Demonstrated in murine model)
81960	IFIT1	9606	22745654	IFIT1 is an innate immune network bottleneck with the ability to suppress induction of TLR4 response genes in LPS-stimulated macrophages. (Demonstrated in mice)
81960	IFIT1	9606	24098121	IFIT1 binds mRNAs that lack 2â²O methylation on the first ribose, thus inhibiting translation by impairing binding of eukaryotic translation initiation factors to 2â²O-unmethylated RNA templates
81960	IFIT1	9606	24371270	IFIT1 binds with high affinity to the cap-proximal regions of cap0-mRNAs abrogating 48S complex formation in an in vitro reconstituted translation system.
79651	BTK	9606	12724322	BTK is a Toll/interleukin-1 receptor domain-binding protein that participates in NF-kappaB activation by TLR4.
79651	BTK	9606	21441935	BTK interacts with intracellular MHC class II molecules to activate adaptor molecules MYD88 and TICAM1 to promote TLR signalling. (Demonstrated in murine model)
79651	BTK	9606	21659545	BTK is a positive regulator in the ITAM-mediated TREM1/TYROBP pathway, which induces pro-inflammatory cytokines such as TNF-alpha, IL8, and activation/differentiation cell surface markers. Patients suffering from X-linked agammaglobulinemia (XLA), which is a rare hereditary disease caused by mutation in the BTK gene, show reduced TNF-alpha induction in PBMCs upon TREM1 engagement.
79651	BTK	9606	22454496	BTK directly phosphorylates TLR3 and plays a critical role in the induction of inflammatory cytokines and IFNB. (Demonstrated in mice)
79651	BTK	9606	22589540	BTK is required for the activation of natural killer cells. (Demonstrated in mice)
79651	BTK	9606	22366891	BTK is a negative regulator of TLR- or TNF-stimulated reactive oxygen species (ROS) production in neutrophils.
79651	BTK	9606	24375473	BTK regulates TLR9-mediated induction of cytokines in plasmacytoid dendritic cells, but has no role in TLR7 signalling.
78146	TRIM14	9606	23438823	TRIM14 was identified in a systematic screen for positive regulators of innate immune responses.
78146	TRIM14	9606	24379373	TRIM14 is a mediator of mitochondrial antiviral immunity facilitating the immune responses mediated by retinoic acid-inducible gene-I-like (RIG-I)-like receptors.
221120	Mir149	10090	24375488	Mir149 negatively regulates TLR/Myd88 mediated inflammatory responses in macrophages by targeting Myd88 mRNA.
152695	Sykb	10090	22031919	Sykb promotes wound healing in human rhinovirus-infected airway epithelial cells. (Demonstrated in human)
152695	Sykb	10090	14699155	SYK is a tyrosine protein kinase that is an upstream activator of c-Jun N-terminal kinase (JNK).
152695	Sykb	10090	16449524	SYK interacts with PLCG2 and plays a role in complement mediated phagocytosis by regulating both actin dynamics and the RhoA activation pathway.
152695	Sykb	10090	19151749	SYK interacts with TRAF-interacting protein (TIRAP), two proteins with opposing effects on tumour necrosis factor (TNF) signalling where SYK enhances the activation of NF-kappaB by TNF and this is antagonized by TIRAP.
152695	Sykb	10090	19339971	SYK operating downstream of ITAM-coupled fungal pattern recognition receptors by controlling both pro-IL-1beta synthesis and inflammasome activation after fungal infection.
152695	Sykb	10090	19913447	SYK and MYD88 adaptor protein pathways activation by bacteria promotes regulatory properties of neutrophils.
152695	Sykb	10090	20401526	SYK is activated by several ITAM-containing or ITAM-coupled C-type lectin receptors on myeloid cells leading to the production of pro-inflammatory cytokines including IL-1-beta to initiate antifungal responses.
152695	Sykb	10090	22031919	SYK promotes wound healing in human rhinovirus-infected airway epithelial cells.
152695	Sykb	10090	24185614	Phosphorylation of the inflammasome adaptor Pycard (ASC) controls inflammasome activity through the formation of ASC specks. The NLRP3 and AIM2 inflammasomes require Syk and Mapk8 (JNK) for their full activity .
152695	Sykb	10090	24212132	The expression of Clec4e (Mincle) and its downstream signal phospho-Syk/Syk increases after cerebral ischemia and reperfusion.
101710	TXNIP	9606	22883233	Hyperactivated ERN1 (IRE1Î±) increases TXNIP mRNA stability by reducing levels of a TXNIP destabilizing microRNA, miR-17. In turn, elevated TXNIP protein activates the NLRP3 inflammasome, causing procaspase-1 cleavage and interleukin 1Î² (IL-1Î²) secretion.
101710	TXNIP	9606	24217221	Endoplasmic reticulum (ER) stress-mediated reactive oxygen species accumulation leads to activation of NLRP3 inflammasome through enhanced secretion of IL1B and binding of TXNIP.
211290	Krt16	10090	24218583	Krt16 participates in the regulation of early inflammation and innate immunity in a broad range of settings involving skin, such as pachyonychia congenita and psoriasis.
157061	Cd5l	10090	21730133	Cd5l (Aim) is required for obesity-associated recruitment of inflammatory macrophages into adipose tissue.
157061	Cd5l	10090	24223991	Cd5l contributes to the macrophage autophagy mechanisms that lead to Mycobacterium. tuberculosis killing.
273442	MIR208B	9606	24241692	The IFNL3 SNP rs4803217 is critical for the outcome of hepatitis C virus (HCV) infecÂ¬tion by controlling the stability of IFNL3 mRNA. HCV induces two microRNAs, MIR499A and MIR208B, that target the polymorphic region of the IFNL3 3â² UTR.
126967	MIR499A	9606	24241692	The IFNL3 SNP rs4803217 is critical for the outcome of hepatitis C virus (HCV) infecÂ¬tion by controlling the stability of IFNL3 mRNA. HCV induces two microRNAs, MIR499A and MIR208B, that target the polymorphic region of the IFNL3 3â² UTR.
50088	IL28B	9606	24041672	IFNL1, IFNL2 and IFNL3 (IL28B) have different effects on Toll-like receptor-related gene expression in HepG2 cells.
50088	IL28B	9606	24241692	The IFNL3 SNP rs4803217 is critical for the outcome of hepatitis C virus (HCV) infecÂ¬tion by controlling the stability of IFNL3 mRNA. HCV induces two microRNAs, MIR499A and MIR208B, that target the polymorphic region of the IFNL3 3â² UTR.
207523	Fscn1	9606	24244012	Fscn1 contributes to the survival of dendritic cells against Listeria monocytogenes infection.
17253	AICDA	9606	24244169	Kaposi's sarcoma-associated herpesvirus (KSHV) infection results in upregulation of AICDA in primary human tonsillar B cells. Two KSHV miRNAs, K12-11 and K12-5 interact with the 3â²UTR of AICDA to translationally repress its expression.
69007	PARD3	9606	24244864	Atypical PKC and PARD3 are inhibitors of the canonical NF-ÎºB activation pathway in epithelial cells.
103733	CD1D	9606	24248359	Lipid transfer proteins saposins play an essential role in modulating human invariant natural killer T cell reactivity to antigen-presenting cells activated by inflammatory stimuli. Lipid-loaded Saposin B mediates lipid transfer onto CD1D and accelerates dissociation of CD1D-bound lipids, promoting lipid exchange.
406966	TICAM2	9606	21494017	TICAM2 deficiency results in the impairment of LPS-stimulated TNF-alpha protein translation. (Demonstrated in murine model)
406966	TICAM2	9606	24297182	ARF6 regulates LPS internalization and LPS-induced relocation of TICAM2 (TRAM), which is required for the MyD88-independent TLR4 signalling cascade.
406966	TICAM2	9606	24255114	The homotypic interaction of TICAM2 Toll/interleukin-1 receptor (TIR) domain is essential to form a scaffold for recruiting the TICAM1 TIR domain.
19505	TICAM1	9606	19412184	TICAM1 adaptor protein is displaced from TICAM2 by a splice variant of TICAM2, TAG, resulting in the negative regulation of the MyD88-independent TLR4 pathway.
19505	TICAM1	9606	20019748	TICAM1 (TRIF)-dependent activation of CASP8 is involved in pro-apoptotic signalling through TLR3 and this under the control of inhibitor of apoptosis proteins in melanoma cells.
19505	TICAM1	9606	12471095	TICAM1 preferentially activates the IFN-beta promoter in the Toll-like receptor signalling, particularly in the MyD88-independent pathway.
19505	TICAM1	9606	14982987	TICAM1 (TRIF) recruits TRAF6-TAK1-TAB2 to TLR3 through its TRAF6-binding site, which is required for NF-kappaB but not IRF3 activation. TLR3/TICAM1-mediated NF-kappaB and IRF3 activation is induced by double-stranded RNA.
19505	TICAM1	9606	12539043	TICAM-1 is an adaptor molecule that participates in TLR3-mediated interferon-beta induction.
19505	TICAM1	9606	14517278	TICAM1 and TICAM2 both function in LPS-TLR4 signalling to regulate the MyD88-independent pathway during the innate immune response to LPS.
19505	TICAM1	9606	14519765	TICAM1 and TICAM2 form an adaptor complex that plays a crucial role in LPS-TLR4-mediated activation of IFN-beta.
19505	TICAM1	9606	21454965	The TICAM1 signalling pathway in murine dendritic cells is crucial for dsRNA-mediated natural killer cell activation. (Demonstrated in murine model)
19505	TICAM1	9606	21494017	TICAM1 deficiency results in the impairment of LPS-stimulated TNF-alpha protein translation. (Demonstrated in murine model)
19505	TICAM1	9606	21602824	TICAM1 is crucial for NLRP3 inflammasome activation in response specific to viable, but not heat-killed, E. coli infections. (Demonstrated in murine model)
19505	TICAM1	9606	21697485	TICAM1 is proteolytically cleaved by Enterovirus 71 3C to inhibit the induction of innate immunity by TLR3-signalling. TICAM1 cleavage results in the inhibition of NFkB and IFN-beta promoter activation.
19505	TICAM1	9606	21703541	TICAM1 forms a dsRNA sensor complex with components DDX1, DDX21 and DHX36 to trigger the type I interferon and cytokine response to poly I:C, influenza A virus, and reovirus. (Demonstrated in murine model)
19505	TICAM1	9606	21760953	TICAM1 is a potent negative regulator of TLR agonist-triggered immune responses, specifically suppressing IL12 in dendritic cells and IFNG in natural killer cells. (Demonstrated in mouse)
19505	TICAM1	9606	22072781	TICAM1-TLR3-mediated signalling pathway plays an essential role in the anti-viral response against poliovirus infection. (Demonstrated in mouse)
19505	TICAM1	9606	22124111	TICAM1 plays a role in host resistance to Gram-negative enteropathogens. TICAM1-mediated protective immunity is orchestrated by macrophage-induced IFN-beta and natural killer cell production of IFN-gamma. (Demonstrated in mice)
19505	TICAM1	9606	22123964	TICAM1 forms a complex with RIPK3 upon Toll-like receptors (TLR) 3 and 4 activation resulting in RIPK3-dependent but TNF-independent necrosis in macrophages. (Demonstrated in mouse)
19505	TICAM1	9606	23723066	TICAM1 (TRIF) enhances expression of Kaposiâs sarcoma-associated herpesviral protein RTA.
19505	TICAM1	9606	24255114	The homotypic interaction of TICAM2 Toll/interleukin-1 receptor (TIR) domain is essential to form a scaffold for recruiting the TICAM1 TIR domain.
136838	Cd36	10090	24257313	MSR1 and Cd36 share several ligands and are involved in largely overlapping physiological and pathological processes, but they differ significantly in their effects on proinflammatory and immunoregulatory functions of macrophages.
8289	MSR1	9606	19914718	MSR1 is required for sensing human cytomegalovirus (HCMV) by endosomal TLR3 and TLR9 in monocytic THP-1 cells.
8289	MSR1	9606	20162551	MRS1 (SR-A) is upregulated in TLR4-mediated LPS responses and these receptors contribute to the efficient capturing and clearance of invading microbial pathogens.
8289	MSR1	9606	21460221	MSR1 deficiency leads to greater sensitivity to LPS-induced endotoxic shock. MSR1 down-regulates inflammatory gene expression in dendritic cells by suppressing TLR4-mediated activation of NFKB.
8289	MSR1	9606	21756882	MSR1, one of the principal receptors expressed on macrophages, suppresses macrophage activation by inhibiting the binding of lipopolysaccharide (LPS) to TLR4 in a competitive manner; thus playing a pivotal role in the regulation of the LPS-induced inflammatory response. (Demonstrated in murine model)
8289	MSR1	9606	22751446	Deletion of MSR1 results in protection from septic shock and modulation of TLR4 signalling in peritoneal macrophages. (Demonstrated in mice)
8289	MSR1	9606	24257313	MSR1 and Cd36 share several ligands and are involved in largely overlapping physiological and pathological processes, but they differ significantly in their effects on proinflammatory and immunoregulatory functions of macrophages.
21100	HMGB1	9606	19890330	HMGB1 functions as universal sentinel for nucleic-acid-mediated innate immune responses.
21100	HMGB1	9606	19914413	HMGB1 activates innate immunity mechanisms as a complex with DNA, lipids and/or pro-inflammatory cytokines.
21100	HMGB1	9606	20419158	HMGB1 is an alarmin and a key mediator of natural killer (NK)-dendritic cell (DC) cross-talk and plays a pivotal role in the escape of Human Immunodeficiency Virus (HIV)-infected dendritic cells from TRAIL-mediated NK cell cytotoxicity during NK-DC cross-talk by upregulating c-FLIP and c-IAP2 expression.
21100	HMGB1	9606	21372296	HMGB1 is an endogenous TLR4 ligand in macrophages and its release in wounds initiates TLR4-dependent responses that contribute to neovascularization. (Demonstrated in murine model)
21100	HMGB1	9606	21389264	HMGB1 is found in high concentrations within neutrophil extracellular traps (NETs). HMGB1 is a neutrophil protein that facilitates the uptake and recognition of mammalian DNA by plasmacytoid dendritic cells, and may play a role in Systemic Lupus Erthermatosus autoimmunity.
21100	HMGB1	9606	21860212	HMGB1 plays a key regulatory role in polymorphonuclear neutrophil (PMN) recruitment to inflammatory tissues. Low concentrations of HMGB1 (50-100 ng/ml) reduce baseline PMN migration as well as formyl-methionyl-leucyl-phenylalanine- and IL8-induced PMN chemotaxis, whereas higher HMGB1 concentrations (5000 ng/ml) have a chemoattractant effect on PMN through IL8 production.
21100	HMGB1	9606	21871094	HMGB1 has a pathogenic role in arthritis, where in complex with lipopolysaccharide, IL1A or IL1B, HMGB1 boosts the production of proinflammatory cytokines and MMP3 as demonstrated in synovial fibroblasts from rheumatoid arthritis and osteoarthritis patients.
21100	HMGB1	9606	22396017	Nuclear HMGB1 translocates to the cytoplasm in LPS-stimulated macrophages to potentiate inflammatory responses. (Demonstrated in mice)
21100	HMGB1	9606	24257755	Mast cell chymase CMA1 contributes to the control of inflammation by degrading the virulence factor Hsp70 of Trichinella spiralis, as well as several alarmins such as endogenous HSPA1A, BGN, and HMGB1..
89505	BGN	9606	24257755	Mast cell chymase CMA1 contributes to the control of inflammation by degrading the virulence factor Hsp70 of Trichinella spiralis, as well as several alarmins such as endogenous HSPA1A, BGN, and HMGB1..
79274	HSPA1A	9606	21448922	HSPA1A is secreted into the extracellular space during exercise-induced stress and increases the intracellular levels of cAMP, which acts as an "intracellular danger signal" to activate neutrophils.
79274	HSPA1A	9606	24257755	Mast cell chymase CMA1 contributes to the control of inflammation by degrading the virulence factor Hsp70 of Trichinella spiralis, as well as several alarmins such as endogenous HSPA1A, BGN, and HMGB1.
3997	CMA1	9606	24257755	Mast cell chymase CMA1 contributes to the control of inflammation by degrading the virulence factor Hsp70 of Trichinella spiralis, as well as several alarmins such as endogenous HSPA1A, BGN, and HMGB1..
75811	TIRAP	9606	11526399	TIRAP is a Toll/Interleukin-1 receptor (TIR) domain containing adapter protein that binds to TLR4, serving as a bridge for MYD88 recruitment.
75811	TIRAP	9606	19717524	TIRAP is dispensable in TLR2 signalling at high ligand concentrations in macrophages and dendritic cells, with MyD88 probably coupling to the TLR2 receptor complex at sufficient levels to allow activation but has an inhibitory role in the signalling of TLR3 to JNK.
75811	TIRAP	9606	11544529	TIRAP is an adapter in Toll-like receptor 4 (TLR4) signal transduction.
75811	TIRAP	9606	12447442	TIRAP is differentially involved in signalling by members of the Toll-like receptor (TLR) family and may account for specificity in the downstream signalling of individual TLRs.
75811	TIRAP	9606	12447441	TIRAP has a crucial role in the MyD88-dependent signalling pathway shared by TLR2 and TLR4.
75811	TIRAP	9606	20400509	TIRAP is a substrate for IRAK1 and IRAK4 with phosphorylation promoting its ubiquitination and degradation.
75811	TIRAP	9606	2095775	TIRAP is an activator of TLR2/4 signalling and a negative regulator of TLR3/TRIF signalling. TIRAP is essential in restricting TLR3 signalling thereby protecting the host from unwanted immunopathologies associated with excessive IFN-beta production.
75811	TIRAP	9606	21705416	TIRAP Ser180Leu polymorphism is significantly associated with Behcet's disease in UK, but not Middle Eastern, patients. It is suggested that the Ser180Leu functional variant of TIRAP will lead to greater cytokine production and tissue damage with persistence of mucosal lesions upon encounter with pathogens.
75811	TIRAP	9606	24265315	TIR domain-contaning protein from Brucella melitensis, TcpB, disrupts the receptor-adaptor interaction between TLR4 and TIRAP.
193788	C3	9606	24273177	C3a and its receptor C3ar1 are critical for defense against C. psittaci in mouse lung infection.
185906	C3ar1	9606	24273177	C3a and its receptor C3ar1 are critical for defense against C. psittaci in mouse lung infection.
142234	Rheb	9606	24130493	Mycobacterial infection induces expression of Mir155, which promotes the maturation of phagosomes and represses the expression of Rheb by targeting its 3âUTR
142234	Rheb	9606	24282297	The interplay between Tsc1-Rheb-mTOR complex 1 signalling and Myc-dependent metabolism are dynamically regulated during dentritic cell (DC) development, whereas uncontrolled mTORC1 activation impairs DC development.
152579	Tsc1	10090	22412198	Tsc1 inhibits TLR response and endotoxin tolerance through repression of mTORC1 and JNK1/2 signalling pathways.
152579	Tsc1	10090	23776173	TSC1 is a critical regulator of dendritic cell function in both innate and adaptive immunity.
152579	Tsc1	10090	24282297	The interplay between Tsc1-Rheb-mTOR complex 1 signalling and Myc-dependent metabolism are dynamically regulated during dentritic cell (DC) development, whereas uncontrolled mTORC1 activation impairs DC development.
204403	Mtor	10090	21368289	Inhibition of mTOR blocks the anti-inflammatory potency of glucocorticoids both in human monocytes and myeloid dendritic cells. (Demonstrated in human)
204403	Mtor	10090	24282297	The interplay between Tsc1-Rheb-mTOR complex 1 signalling and Myc-dependent metabolism are dynamically regulated during dentritic cell (DC) development, whereas uncontrolled mTORC1 activation impairs DC development.
172240	Kdr	10090	24270517	Mir126-Kdr axis is an important regulator of the innate response. Mir126 controls the survival and function of plasmacytoid dendritic cells and regulates gene expression of Tlr7, Tlr9, Nfkb1 and Kdr.
172240	Kdr	10090	24270517	Mir126 controls the IFN-Î±/Î² responses to pathogen-associated nucleic acids through regulating the homeostasis and function of plasmacytoid dendritic cells (pDCs). Mir126 operates in part by regulating Kdr which encodes the growth factor receptor VEGFR2 in pDCs
224249	Mir126	10090	24270517	Mir126-Kdr axis is an important regulator of the innate response. Mir126 controls the survival and function of plasmacytoid dendritic cells and regulates gene expression of Tlr7, Tlr9, Nfkb1 and Kdr.
224249	Mir126	10090	24270517	Mir126 controls the IFN-Î±/Î² responses to pathogen-associated nucleic acids through regulating the homeostasis and function of plasmacytoid dendritic cells (pDCs). Mir126 operates in part by regulating Kdr which encodes the growth factor receptor VEGFR2 in pDCs
152917	Stat4	10090	15356157	Stat4 is required for the generation of an effective innate host defense against bacterial pathogens of the lung.
152917	Stat4	10090	24285835	Ity14 (Immunity to Typhimurium locus 14) mice with a mutation in Stat4 have an increased innate susceptibility following sublethal invasive S. Typhimurium challenge.
5864	ARF6	9606	22170068	ARF6 has a pivotal role in TLR9-mediated immune signaling by regulating the cellular uptake of CpG oligodeoxynucleotides.
5864	ARF6	9606	24297182	ARF6 regulates LPS internalization and LPS-induced relocation of TICAM2 (TRAM), which is required for the MyD88-independent TLR4 signalling cascade.
194120	Dusp16	10090	24311790	Dusp16 has a dual function in the innate immune system shaping the output of cytokines and other TLR-induced gene products by macrophages, most notably IL12, and regulating the responsiveness of bone marrow progenitor cells to the growth factor GM-CSF
21798	C3	9606	16875735	Central protein of the complement system; Classical, lectin and alternative pathways of complement all converge at the activation of C3 yielding a diverse set of biological responses
21798	C3	9606	24315997	T cell-expressed CTSL1 cleaves C3 into active C3a and C3b fragments mediating the intracellular and extracellular C3 activation in T cells.
74981	CTSL1	9606	20926012	CTSL1 enhances angiogenesis by increasing extracellular matrix degradation and remodelling.
74981	CTSL1	9606	24315997	T cell-expressed CTSL1 cleaves C3 into active C3a and C3b fragments mediating the intracellular and extracellular C3 activation in T cells.
92817	TRAF2	9606	11479302	TRAF2 and TRAF5 are signal transducers for the TNF receptor superfamily and are involved in TNF-induced NF-kappaB activation and protection from cell death.
92817	TRAF2	9606	19150425	TRAF2 plays a critical role in TNF signalling by directing the IKK complex to the membrane, promoting TRAF2 K63-linked ubiquitination, and positioning the IKKalpha and IKKbeta chains with the TAK1/TAB kinase.
92817	TRAF2	9606	20449947	TRAF2 competes with TRAF6 for CD40 binding, thereby limiting the capacity of CD40 engagement to induce NF-kappaB activation in human lymphocytes.
92817	TRAF2	9606	22546736	TRAF2 deficiency results in the accumulation of TNF-dependent, IL10-secreting neutrophils. Combined treatment of neutralizing antibodies against both TNF and IL10 substantially ameliorated the colitis phenotype in the Traf2 null mice. (Demonstrated in mice)
92817	TRAF2	9606	24323043	GNB2L1 (RACK1) negatively regulates NFÎºB activation by interacting with CHUK and IKBKB. The interaction interferes with the recruitment of the IKK complex to TRAF2 .
63034	GNB2L1	9606	24323043	GNB2L1 (RACK1) negatively regulates NFÎºB activation by interacting with CHUK and IKBKB. The interaction interferes with the recruitment of the IKK complex to TRAF2 .
199298	Rnasel	10090	21190483	Rnasel cleaves RNA during viral infections and the cleavage products induces the RIG-I pathway and production of Ifnb gene. In addition, Rnasel is implicated in the protection of central nervous system against viral-induced demyelination. A broader role in innate immunity is suggested by involvement of Rnasel in cytokine induction and endosomal pathways that suppress bacterial infections.
199298	Rnasel	10090	24324683	RNASEL contributes to innate immunity through regulating macrophage functions.
148417	Mapk8	10090	24185614	Phosphorylation of the inflammasome adaptor Pycard (ASC) controls inflammasome activity through the formation of ASC specks. The NLRP3 and AIM2 inflammasomes require Syk and Mapk8 (JNK) for their full activity .
85951	ELF4	9606	24185615	After viral infection, ELF4 binds to TMEM173 (STING) and induces type I interferon. ELF4 is critical for host antiviral defense.
211512	Dhx58	10090	24434553	Cytotoxic stress exemplified by ionizing radiation induces IFN-beta and enhances the expression of Dhx58 which in turn suppresses the interferon stimulated genes associated with cytotoxic stress by turning off the expression of IFN-beta.
99443	JAK1	9606	8041779	JAK1 physically associates with IL2RB and tyrosine phosphorylation of JAK1 is induced upon IL2 stimulation, suggesting that regulation of JAK1 may be linked to IL2 induced signal transduction.
99443	JAK1	9606	15988755	JAK1 and JAK2 are tyrosine kinases involved in the regulation of cell proliferation, differentiation, and survival and simultaneous activation of both JAK1 and JAK2 fusion proteins, but not either one alone, leads to the tyrosine phosphorylation of IL3RB, the activation of downstream signalling molecules, including STAT5, AKT, and MAPK, and the conferring of factor-independent growth to IL-3-depe…
99443	JAK1	9606	24449862	TNK1 is a component of the IFN-JAK-STAT signalling cascade and is a critical antiviral host factor where its abundance is inversely correlated to viral replication and contributes to the hepatocytic response to antiviral treatment.
24740	TNK1	9606	24449862	TNK1 is a component of the IFN-JAK-STAT signalling cascade and is a critical antiviral host factor where its abundance is inversely correlated to viral replication and contributes to the hepatocytic response to antiviral treatment.
158682	Reg3g	10090	24345802	Reg3g has a protective role against mucosal infection by binding to Gram-negative and Gram-positive bacteria, and influences mucus distribution in the ileum and contributes to mucosal protection.
156238	Nlrx1	10090	21703540	Nlrx1 deletion leads to constitutive interaction of Mavs and Ddx58, resulting in increased inflammation. Nlrx1 knockout mice showed increased expression of antiviral signalling molecules such as Ifnb, Stat2, Oas1 and Il6 after influenza infection. In addition to attenuating the antiviral response, Nlrx1 directly associates with Traf6 and inhibits NFkB pathway in LPS-activated macrophages.
156238	Nlrx1	10090	21703539	Nlrx1 negatively regulates TLR-mediated NFkB activation by directly interacting with Traf6 or IKK kinase. Nlrx1 knockdown in mice enhances their susceptibility to LPS-induced septic shock and increases plasma Il6 levels.
156238	Nlrx1	10090	22749352	Nlrx1 attenuates type I IFN production and promotes autophagy during viral infection. (Demonstrated in human)
156238	Nlrx1	10090	24366868	Nlrx1 attenuates macrophage/microglial inflammatory activities and protects against experimental autoimmune encephalomyelitis caused by autoreactive T cells.
12161	SLX4	9606	24412650	HIV auxiliary protein Vpr directly activates SLX4 to promote cell cycle arrest at the G2/M, a process that requires VPRBP-DDB1-CUL4 E3-ligase complex, to escape from innate immune sensing.
209867	Bcl2l1	10090	24412611	Microbiota-driven Il17c induces Bcl2 and Bcl2l1 expression in intestinal epithelial cells in an autocrine manner to promote cell survival and tumorigenesis in both chemically induced and spontaneous intestinal tumor models.
185673	Bcl2	10090	21850221	Bcl2 is a multifunctional regulator of cell survival that inhibits the innate immune response during early stages of pathogenesis. Muscle-specific expression of Bcl2 in Lama2-deficient mice resulted in the inhibition of Tlr4, Tlr6, Tlr7, Tlr8 and Tlr9 induction, leading to reduced infiltration of eosinophils, the principal death effector cells.
185673	Bcl2	10090	24412611	Microbiota-driven Il17c induces Bcl2 and Bcl2l1 expression in intestinal epithelial cells in an autocrine manner to promote cell survival and tumorigenesis in both chemically induced and spontaneous intestinal tumor models.
197277	Il17c	10090	21993848	Il17c is an essential autocrine cytokine that regulates innate epithelial immune responses. (Demonstrated in human)
197277	Il17c	10090	24412611	Microbiota-driven Il17c induces Bcl2 and Bcl2l1 expression in intestinal epithelial cells in an autocrine manner to promote cell survival and tumorigenesis in both chemically induced and spontaneous intestinal tumor models.
209673	Il27	10090	22156348	Il27 priming results in an enhanced LPS-induced proinflammatory response in primary monocytes, specifically increasing expression of Il6, Tnf, Ccl3, and Ccl4. (Demonstrated in human)
209673	Il27	10090	24408967	Influenza virus infection induces pulmonary Il27 production in a type I IFN-alpha/beta receptor (IFNAR) signalling-dependent manner, which sensitizes mice to secondary pneumococcal infection downstream of IFNAR pathway.
135340	Gata3	10090	23733962	Gata3 is a critical regulator of innate lymphoid cell development from hematopoietic stem cells.
135340	Gata3	10090	24419270	Gata3 plays a generalized role in innate lymphoid cell (ILC) lineage determination and is critical for the development of gut Rorc+ group 3 ILCs subsets that maintain mucosal barrier homeostasis.
728297	EGLN2	9606	24145445	Regulation of IL1B-induced NF-ÎºB by hydroxylases links key hypoxic and inflammatory signaling pathways in a manner that is dependent upon the combinatorial blockade of both EGLN2 and HIF1AN.
86613	HIF1AN	9606	24145445	Regulation of IL1B-induced NF-ÎºB by hydroxylases links key hypoxic and inflammatory signaling pathways in a manner that is dependent upon the combinatorial blockade of both EGLN2 and HIF1AN.
206063	Ifi202b	9606	24131791	Cyclic-di-GMP-induced levels of Ifi202b suppress the expression of Tmem173 (STING).
157258	Il9	10090	21983833	Il9 production is largely restricted to innate lymphoid cells during papain-induce lung inflammation and serves as an as important bridging link to induce type 2 helper T cell responses.
157258	Il9	10090	24138883	Th9 cells and IL-9 have a critical and nonredundant role in host-protective type 2 immunity against parasitic worm infection
1833	CRKL	9606	9872990	A type-I-IFN receptor that functions as a nuclear adapter protein and associates with STAT5 to regulate gene transcription through DNA binding
1833	CRKL	9606	24145029	Enterohemorrhagic E. coli NleH1 effector targets CRKL to inhibit ribosomal protein S3 nuclear translocation and the NFÎºB pathway.
155803	Numb	9606	24092752	Nod2 driven inflammation is regulated by nitric oxide responsive Mir146 that facilitates activation of sonic hedgehog (SHH) signalling by targeting Numb expression.
80616	XRCC5	9606	24098118	Vaccinia virus protein C16 influences the immune response by binding to the XRCC6/XRCC5 (Ku70/80) complex thus blocking PRKDC-dependent DNA sensing in fibroblasts
9323	XRCC6	9606	24098118	Vaccinia virus protein C16 influences the immune response by binding to the XRCC6/XRCC5 (Ku70/80) complex thus blocking PRKDC-dependent DNA sensing in fibroblasts
408612	PRKDC	9606	24098118	Vaccinia virus protein C16 influences the immune response by binding to the XRCC6/XRCC5 (Ku70/80) complex thus blocking PRKDC-dependent DNA sensing in fibroblast.
159854	Ifit1	10090	21642987	Ifit1 recognizes and directly binds to 5'-triphosphate RNA and functions as an innate inhibitor of viral replication and pathogenicity.
159854	Ifit1	10090	22745654	Ifit1 is an innate immune network bottleneck with the ability to suppress induction of Tlr4 response genes in LPS-stimulated macrophages.
159854	Ifit1	10090	24098121	IFIT1 binds mRNAs that lack 2â²O methylation on the first ribose, thus inhibiting translation by impairing binding of eukaryotic translation initiation factors to 2â²O-unmethylated RNA templates
203813	Mfn2	10090	21285412	Mfn2 deletion causes inability of the cell to undergo mitochondrial fusion, and therefore exhibit impaired induction of interferons and proinflammatory cytokines in response to viral infection - which results in increased viral replication.
203813	Mfn2	10090	24127597	Mitochondrial membrane potential is required for the association of Nlrp3 and Mfn2. Mfns2 is required for the activation of Nlrp3 inflammasomes.
29713	F2RL1	9606	18622013	F2RL1 and TLR4 interact in a synthetic agonist peptide-dependent manner and may support a novel paradigm of receptor cooperativity in inflammatory responses.
29713	F2RL1	9606	19675284	F2RL1 is involved in inflammation and is specifically activated by mast cell-derived tryptase.
29713	F2RL1	9606	11907122	Activation of F2RL1 stimulates IL6, IL8, and PTGER2 (prostaglandin E2) release from human respiratory epithelial cells, thus having an important role in modulating inflammation in the lung.
29713	F2RL1	9606	19865078	F2RL1 cooperates with TLR2, TLR3, or TLR4 for activation of nuclear factor-kappaB-dependent signalling in mucosal epithelial cell lines.
29713	F2RL1	9606	19865078	Activation of F2RL1 negatively regulates TLR3-dependent antiviral pathway, blunting the expression of TLR3/IRF3 driven genes, as well as activation of IRF3 and STAT1.
29713	F2RL1	9606	21029417	F2RL1 (PAR2) activates MAPK14 (p38) to trigger production of innate immunity markers in oral kertainocytes.
29713	F2RL1	9606	24129891	IL32 interacts with PR3 and F2RL1, triggering the PAR2-TRIF signalling axis, and IL32 may have a potential role in the transition from innate to adaptive immunity.
13084	PRTN3	9606	24129891	IL32 interacts with PRTN2 (PR3) and F2RL1, triggering the PAR2-TRIF signalling axis, and IL32 may have a potential role in the transition from innate to adaptive immunity.
149582	Msr1	10090	21460221	Msr1 deficiency leads to greater sensitivity to LPS-induced endotoxic shock. Msr1 down-regulates inflammatory gene expression in dendritic cells by suppressing Tlr4-mediated activation of NFKB.
149582	Msr1	10090	21756882	Msr1, one of the principal receptors expressed on macrophages, suppresses macrophage activation by inhibiting the binding of lipopolysaccharide (LPS) to Tlr4 in a competitive manner; thus playing a pivotal role in the regulation of the LPS-induced inflammatory response.
149582	Msr1	10090	24035364	Autophagy regulates phagocytosis by modulating the expression of scavenger receptors, Marco and Msr1
188086	Marco	9606	24035364	Autophagy regulates phagocytosis by modulating the expression of scavenger receptors, Marco and Msr1
80858	CEBPB	9606	18820298	CEBPB, one of the CEBP family members, is a crucial regulator of gene expression during innate immunity, inflammatory responses and adipogenesis. All of the individual CEBPB isoforms, LAP1, LAP2 and LIP, attenuate EGF-induced PTGS2 (COX-2) promoter activity.
80858	CEBPB	9606	21326902	CEBPB is a member of the CCAAT enhancer binding protein family and is a transcriptional factor regulating genes in innate immunity and inflammation. The activities of CEBP are regulated via methylation of arginine and lysine side chains.
80858	CEBPB	9606	24038085	CREB1 and CEBPB are involved in cytokine production in neutrophils in response to LPS and TNF.
79573	CREB1	9606	19585511	CREB1 and AP1 transcription factor activation regulates LPS- or M-CSF-induced activation of the MAPK phosphatase-1 (MKP-1) gene, a protein phosphatase that plays a crucial role in innate immunity.
79573	CREB1	9606	18034423	CREB1 has a key role in transcriptional regulation of macrophage migration inhibitory factor (MIF) gene expression and MIF-dependent host antimicrobial innate immune defence.
79573	CREB1	9606	24038085	CREB1 and CEBPB are involved in cytokine production in neutrophils in response to LPS and TNF.
203203	Nos2	10090	16893173	Nos2 (iNOS) and Calm1 (CaM) coordinately function to form a stable complex that is part of a rapid host response that functions within the first 30 min following bacterial infection to upregulate the innate immune system involving macrophage activation.
203203	Nos2	10090	22542147	Nitric oxide production by Nos2 promotes Listeria monocytogenes dissemination in the host.
203203	Nos2	10090	24040305	Inorganic polyphosphate suppresses Nos2 expression and nitric oxide release but not TNF release in LPS-activated macrophages
50102	IL28A	9606	21499846	IL28A is able to efficiently inhibit Herpes Simplex Virus Type-1 replication in neuronal cells by inducing the expression of TLR as well as activate the TLR-mediated interferon antiviral pathway.
50102	IL28A	9606	24041672	IFNL1, IFNL2 (IL28A) and IFNL3 have different effects on Toll-like receptor-related gene expression in HepG2 cells.
181483	Nfe2l2	10090	21220332	Nfe2l2 plays an important role in Tlr4-mediated autophagy. Nfe2l2 is activated by reactive oxygen species-Mapk14 axis-dependent Tlr4 signaling, and induces the accumulation of Sqstm1 and aggresome-like induced structures.
181483	Nfe2l2	10090	24011591	Phosphorylation of Sqstm1 (p62) activates the Keap1-Nrf2 pathway during selective autophagy
139531	Keap1	10090	24011591	Phosphorylation of Sqstm1 (p62) activates the Keap1-Nrf2 pathway during selective autophagy
55893	IL12B	9606	20145200	IL12B production in response to Toll-like receptor (TLR) stimulation is regulated by the tyrosine phosphatase activity of PTPN6 and this is a novel mechanism for host regulation of IL12, a cytokine important in both innate and adaptive immunity.
55893	IL12B	9606	20935648	IL12, consisting of IL12A and IL12B subunits, initiates local antitumor immunity by stimulating lymphoid tissue-inducer (LTi) cells bearing the natural cytotoxicity receptor NCR1 (NKp46).
55893	IL12B	9606	22888135	IL12, consisting of IL12A and IL12B subunits, induces IL2RA to form high-affinity IL2 receptors on natural killer cells in response to mouse cytomegalovirus infection. (Demonstrated in mouse)
55893	IL12B	9606	23990628	Macrophages cultured with bile acids produce lower levels of IL12 and display an anti-inflammatory phenotype characterized by an increased ratio of IL10 to IL12
55893	IL12B	9606	24012417	IFN gamma creates a primed chromatin environment in macrophages to augment TLR-induced IL12B transcription
213090	Cebpb	10090	21326902	Cebpb is a member of the CCAAT enhancer binding protein family and is a transcriptional factor regulating genes in innate immunity and inflammation. The activities of CEBP are regulated via methylation of arginine and lysine side chains.
213090	Cebpb	10090	23472114	LPS stimulation promotes the formation of CEBPB complexes on the Serpinb2 promoter to drive transcription.
213090	Cebpb	10090	24023826	Tnfaip3 is regulated by both Nf-ÎºB and p38-dependent Cebpb in response to LPS in macrophages.
60223	TRIM25	9606	17392790	TRIM25 is essential for RIG-I-mediated antiviral activity by inducing Lys 63-linked ubiquitination of DDX58 which is crucial for RIG-I signalling pathway.
60223	TRIM25	9606	23438823	TRIM25 was identified in a systematic screen for positive regulators of innate immune responses.
60223	TRIM25	9606	23950712	RNF135 is essential for the association of DDX58 (RIG-I) and TRIM25, resulting in the activation of RIG-I signalling.
39370	RNF135	9606	23950712	RNF135 is essential for the association of DDX58 (RIG-I) and TRIM25, resulting in the activation of RIG-I signalling.
777831	IKBKG	9606	10968790	IKBKG is the regulatory subunit of the IKK-signalosome complex that is required for proinflammatory activation of the I-kappaB-kinase (IKK) complex.
777831	IKBKG	9606	19136968	IKBKG is linearly polyubiquitinated by the LUBAC ligase complex, consisting of RNF31 and RBCK1 proteins, to regulate the canonical NF-kappaB activation pathway.
777831	IKBKG	9606	18080803	IKBKG regulates TNF alpha signaling by coordinating cell responses mediated by the AP-1 and NF-kappa B pathways.
777831	IKBKG	9606	20010814	IKBKG is essential for NF-kappaB activation and the polyubiquitylation and the degradation of IKBKG during Shigella infection is a new bacterial strategy to modulate host inflammatory responses.
777831	IKBKG	9606	23951545	The binding of MAVS to Traf2, Traf5, and Traf6 is dependent on virus infection and MAVS polymerization. The TRAF proteins promote ubiquitination that recruits IKBKG binding to the MAVS signalling complex
208924	Traf5	9606	23951545	The binding of MAVS to Traf2, Traf5, and Traf6 is dependent on virus infection and MAVS polymerization. The TRAF proteins promote ubiquitination that recruits IKBKG binding to the MAVS signalling complex
205458	Mertk	9606	23954153	Viruses engage Tyro3/Axl/Mertk (TAM) receptors in order to inhibit host type I IFN signalling.
158468	Axl	9606	23954153	Viruses engage Tyro3/Axl/Mertk (TAM) receptors in order to inhibit host type I IFN signalling.
199993	Tyro3	10090	23954153	Viruses engage Tyro3/Axl/Mertk (TAM) receptors in order to inhibit host type I IFN signalling.
35872	LGALS9	9606	21562126	LGALS9 attenuates acute lung injury by preferentially suppressing pro-inflammatory functions in pDC-like macrophages through TLR2/TLR4 down-regulation.
35872	LGALS9	9606	23408620	LGALS9 engagement impairs the cytotoxicity function and cytokine production of natural killer cells.
35872	LGALS9	9606	23967307	TLR activation promotes HAVCR2 and LGALS9 association within the same macrophage to differentially regulate IL12/IL23 expressions via STAT3 phosphorylation.
17159	CLEC4D	9606	23911656	CLEC4D and CLEC6A form a heterodimer complex which confers innate cells high ability to sense C. albicans infection by facilitating the activation of NFÎºB dependent inflammatory responses.
19657	HDAC11	9606	23980205	MIR145 directly targets HDAC11 to promote IL10 expression in TLR4-triggered macrophages.
126739	MIR145	9606	23392170	MIR145 targets SOCS7 to promote IFNB induction in bladder cancer cells.
126739	MIR145	9606	23980205	MIR145 directly targets HDAC11 to promote IL10 expression in TLR4-triggered macrophages
98830	PARK2	9606	20457763	PARK2 was recently shown to promote the clearance of impaired mitochondria by autophagy, termed mitophagy; PARK2 promotes mitophagy by catalyzing mitochondrial ubiquitination, which in turn recruits ubiquitin-binding autophagy components, HDAC6 and p62, leading to mitochondrial clearance.
98830	PARK2	9606	24005326	PARK2 is important for innate defence against M. tuberculosis for having a role in ubiquitin-mediated autophagy of M. tuberculosis
7203	POLR2F	9606	23994473	During the transcriptional response to Sendai virus infection, POLR2F(RNA Pol II) is recruited by IRF3 and NFÎºB to control virus induced gene activation.
18750	IDO1	9606	22355111	IDO1 limits innate and adaptive immunity to apoptotic self-antigens. IDO1-mediated inhibition of inflammation plays a key role in suppressing systemic autoimmune diseases. (Demonstrated in mice)
18750	IDO1	9606	23986532	DNA nanoparticle is sensed selectively by myeloid dendritic cells (DCs) via the STING (for stimulator of interferon genes) /type I IFN pathway to induce Ido1 in DCs, which activate regulatory T cells.
71595	CXCL12	9606	24000293	MIR141 directly regulates CXCL12 expression and CXCL12 mediated leukocyte migration during colonic inflammation.
126529	MIR141	9606	24000293	MIR141 directly regulates CXCL12 expression and CXCL12 mediated leukocyte migration during colonic inflammation
101753	PIAS3	9606	23998932	MIR21 inhibition enhances CCL5 (RANTES) and CXCL10 (IP-10) release in MCF-7 cancer cells and resulted in increased lymphocyte migration . PIAS3 is a target of MIR21 in MCF-7 cells.
42204	CCL5	9606	20386592	CCL5 expression activates the IFN response during C. pneumoniae infection is mediated by intracellular nucleotide-sensing pattern recognition receptors (PRRs), which operate through a mechanism dependent on the bacterial type III secretion system (T3SS).
42204	CCL5	9606	20523058	CCL5 expression in airway epithelial cells is regulated by cross-talk between TLR3 signalling and inflammatory cytokines where TNF-alpha activates NF-kappaB, in cooperation with TLR3 signalling.
42204	CCL5	9606	23998932	MIR21 inhibition enhances CCL5 (RANTES) and CXCL10 (IP-10) release in MCF-7 cancer cells and resulted in increased lymphocyte migration . PIAS3 is a target of MIR21 in MCF-7 cells.
126673	MIR21	9606	21652514	MIR21 targets PDCD4, which acts a molecular switch between the pro-inflammatory (NFkB) and anti-inflammatory (IL10) response. MIR21-mediated reduction of PDCD4 is essential for protecting against the lethal effects of LPS.
126673	MIR21	9606	22286305	MIR21 is upregulated during Mycobacterium leprae infection of monocytes to escape from vitamin D-dependent antimicrobial pathways.
126673	MIR21	9606	23580661	Circulating MIR21 activates natural killer cells via the TLR1 signalling pathway.
126673	MIR21	9606	23998932	MIR21 inhibition enhances CCL5 (RANTES) and CXCL10 (IP-10) release in MCF-7 cancer cells and resulted in increased lymphocyte migration . PIAS3 is a target of MIR21 in MCF-7 cells.
64056	UCP2	9606	23988448	MIR133A1 enhances CASP1 activation and IL1B processing and suppresses inflammasome activation by suppressing its target UCP2
127431	MIR133A1	9606	23988448	MIR133A1 enhances CASP1 activation and IL1B processing and suppresses inflammasome activation by suppressing its target UCP2
63368	IL12A	9606	20935648	IL12, consisting of IL12A and IL12B subunits, initiates local anti-tumour immunity by stimulating lymphoid tissue-inducer (LTi) cells bearing the natural cytotoxicity receptor NCR1 (NKp46).
63368	IL12A	9606	22888135	IL12, consisting of IL12A and IL12B subunits, induces IL2RA to form high-affinity IL2 receptors on natural killer cells in response to mouse cytomegalovirus infection. (Demonstrated in mouse)
63368	IL12A	9606	23990628	Macrophages cultured with bile acids produce lower levels of IL12 and display an anti-inflammatory phenotype characterized by an increased ratio of IL10 to IL12
2177	RNF125	9606	17460044	RNF125 is an ubiquitin ligase which negatively regulates RIG-I signalling by conjugating ubiquitin to DDX58 and MDA5 and IPS1, tagging them for proteosomal degradation
2177	RNF125	9606	23772026	RNF125 is inhibited by human Bocavirus protein, VP2, to induce the IFNB signalling pathway.
161026	Zbtb20	10090	23776228	ZBTB20 inhibits transcription of IkBa to promote full TLR-triggered immunity. Zbtb20 null mice are resistant to endotoxin shock and sepsis.
94666	ASCC3	9606	23781071	ASCC3 inhibits IFN-signalling to dampen antiviral innate immunity.
89176	MASP2	9606	18596036	MASP2 binds to and is activated by MBL or ficolin in response to pathogen-associated molecular patterns (PAMPs).
89176	MASP2	9606	16189649	MASP2, upon activation, can cleave complement component 4 (C4) and C2 to generate the C3 convertase, C4bC2b.
89176	MASP2	9606	22792067	MASP2 deficient mice are defective in the lectin pathway of complement activation and are highly susceptible to pneumococcal infection. (Demonstrated in mice)
89176	MASP2	9606	23785123	MASP2 forms a complex with MASP1 to activate the complement system.
69257	MASP1	9606	20038603	MASP1 is an essential protease of both the lectin and alternative complement pathways, essential components of innate immunity, participating in the pathogenesis of inflammatory diseases and in host defence.
69257	MASP1	9606	22966085	MASP1 is crucial for classical complement activation, but is not required for the alternative pathway function.
69257	MASP1	9606	23785123	MASP1 forms a complex with MASP2 to activate the complement system.
55716	WNT9B	9606	23785285	Secretion of WNT9B upon virus infection negatively regulates antiviral innate immunity.
101110	WNT2B	9606	23785285	Secretion of WNT2B upon virus infection negatively regulates antiviral innate immunity.
102045	VPS45	9606	23738510	Mutations in VPS45 are associated with congenital neutrophil defect syndrome.
202876	Sarm1	10090	23499490	Upon infection with encephalitic Bunyavirus, SARM1 is activated by RIG-I/MAVS signalling to mediate neuronal cell death.
202876	Sarm1	10090	23751821	Sarm1 is expressed in neurons and regulates the expression of inflammatory and anti-viral cytokines.
202876	Sarm1	10090	23749635	Sarm1 null mice are resistant to central nervous system infection with vesicular stomatitis virus.
407857	TLR9	9606	11130078	TLR9 acts as a receptor for unmethylated CpG-DNA and bacterial DNA to initiate a variety of immune responses.
407857	TLR9	9606	18262306	TLR9 recognizes unmethylated DNA with CpG-motifs and the LR9 mediated signalling pathway is not only responsible for activation of innate immune cells, but also for mounting acquired responses.
407857	TLR9	9606	14579267	TLR9, 8 and 7 form a functional subgroup within the TLR family that recognizes pathogen-associated molecular patterns in endosomal/lysosomal compartments.
407857	TLR9	9606	11867692	TLR9 acts at the cell surface and engages an intracellular signalling pathway that includes MyD88, IRAK, and TRAF6.
407857	TLR9	9606	20034855	TLR9/7-mediated innate immune responses are negatively regulated via selected TLR pathways by a human microsatellite DNA-mimicking oligodeoxynucleotide with CCT repeats.
407857	TLR9	9606	20360853	TLR9 and TLR4 have both non-redundant and cooperative roles in lung innate responses during Gram-negative bacterial pneumonia and are both critical for IL-17 driven antibacterial host response.
407857	TLR9	9606	18820679	TLR9 ectodomain is cleaved to generate a functional receptor; although both the full-length and cleaved forms of TLR9 are capable of binding ligand, only the processed form recruits MyD88 on activation, indicating that this truncated receptor, rather than the full-length form, is functional.
407857	TLR9	9606	21376231	TLR9 signalling enhances the rate of acidification of Salmonella-containing phagosomes, and this acidification induces the expression of Salmonella pathogenecity genes that are necessary for intracellular survival, growth, and systemic infection. TLR9 deficiency rescues the high Salmonella susceptibility phenotype observed in TLR2,TLR4 double mutant mice . (Demonstrated in murine model)
407857	TLR9	9606	21389263	TLR9 triggers plasmacytoid dendritic cells in Systemic Lupus Erythematosus patients upon recognition of self-antigens such as neutrophil extracellular traps (NETs).
407857	TLR9	9606	21402738	TLR9 requires proteolytic processing in endolysosome by asparagine endopeptidase and cathepsin in the endolysosome to initiate signalling in response to DNA. (Demonstrated in murine model)
407857	TLR9	9606	21439959	TLR9 deficiency reduced pancreatic edema, inflammation and pro-IL1B expression in pacreatitis. (Demonstrated in murine model)
407857	TLR9	9606	21482737	TLR9 synergistically interacts with TLR2::TLR6 in lung epithelium to induce rapid pathogen killing, and can be used as a therapeutic target to treat otherwise lethal pneumonia.
407857	TLR9	9606	21604257	TLR9 is proteolytically cleaved in the endosome to form a soluble TLR9 (sTLR9), which inhibits TLR9-dependent signalling and contributes to the prevention of autoimmune disease.
407857	TLR9	9606	21721026	TLR9 activation is enhanced by increased levels of circulating histones, serving as a crucial link between initial damage and activation of innate immunity during sterile inflammation. (Demonstrated in murine model)
407857	TLR9	9606	21860217	TLR9 promotes macrophage HIF1A levels, oxidative burst and nitric oxide production in response to group A Streptococcus (GAS), contributing to GAS clearance in vivo in both localized cutaneous and systemic infection models. (Demonstrated in murine model)
407857	TLR9	9606	21947771	TLR9 is selectively compartmentalized to fungal phagosomes and negatively modulates macrophage anti-fungal effector functions. (Demonstrated in mice)
407857	TLR9	9606	22342842	TLR9 expression and signalling capacity oscillate with the circadian clock. (Demonstrated in mice)
407857	TLR9	9606	22535248	Mitochondrial DNA that escapes from autophagy induces TLR9 inflammatory responses in cardiomyocytes and is capable of inducing myocarditis and dilated cardiomyopathy. (Demonstrated in mice)
407857	TLR9	9606	23071157	TLR9 activation by endogenous self-ligands generated during oxidative stress promotes platelet hyper-reactivity and thrombosis.
407857	TLR9	9606	23752229	Human papillomavirus E7 protein forms a transcriptionally repressive complex over the promoter of TLR9 to suppress the interferon response.
23294	ANKRD17	9606	23711367	ANKRD17 binds to NOD2 and contributes to inflammatory responses against Shigella flexneri.
15224	UCHL1	9606	23717208	Human papillomavirus exploits UCHL1 to suppress interferon, pro-inflammatory cytokines and chemokines production and to dampen NF-kB signalling.
148689	Klf4	10090	23733190	KLF4 mediates the repression of Ciita/MHC-II in M. bovis BCG infected macrophages to evade antigen presentation.
64539	ERN1	9606	20533428	ERN1 (IRE1)/XBP1-mediated signalling plays roles in the coordination of metabolic and immune responses by acting as a regulatory hub, linking endoplasmic reticulum homeostasis with innate immunity and metabolism.
64539	ERN1	9606	22883233	Hyperactivated ERN1 (IRE1Î±) increases TXNIP mRNA stability by reducing levels of a TXNIP destabilizing microRNA, miR-17. In turn, elevated TXNIP protein activates the NLRP3 inflammasome, causing procaspase-1 cleavage and interleukin 1Î² (IL-1Î²) secretion.
64539	ERN1	9606	23684307	ERN1 binds to cholera toxin in the endoplasmic reticulum to activate RIG-I innate immune signalling.
138038	Coch	10090	23684986	COCH is secreted by follicular dendritic cells to promote antibacterial innate immunity.
198471	Cdc42	10090	23690402	Cdc42 has a critical role in mediating innate immunity against upper airway infections.
74081	SRC	9606	19667404	SRC and STAT3 play a role in apoptotic cell-mediated MerTK-dependent immunoregulation of dendritic cells.
49157	CD14	9606	19776284	CD14 co-receptor participates with toll-like receptors (TLRs) in the response of microglial cells to fibrillar forms of beta-amyloid, contributing to microglial activation.
49157	CD14	9606	19840871	CD14 recognizes necrotic cells in addition to LPS, PG, apoptotic cells, and lipids, suggesting that it might be a universal adaptor for damage-associated molecular pattern (DAMP) and pathogen-associated molecular patterns (PAMP).
49157	CD14	9606	10652232	CD14 is a molecule that binds to lipopolysaccharide (LPS) and facilitates its signalling by helping TLR4-LY96 to sense and signal the presence of LPS.
49157	CD14	9606	21078886	CD14 contributes to nucleic acid uptake in macrophages and acts as a co-receptor for endosomal TLR7/TLR9 activation.
49157	CD14	9606	23548899	CD14 acts as an adaptor molecule for the immune recognition of salmonella curli fibers.
22826	IL27	9606	20435892	IL27, a member of the IL-12 cytokine family, acts as a pro-inflammatory cytokine that regulates the differentiation of naive T helper cells and also possesses anti-inflammatory properties.
22826	IL27	9606	20519510	IL27 induces a STAT1/3 and NFkappaB dependent pro-inflammatory cytokine profile in human monocytes.
22826	IL27	9606	20519510	IL27 is a strong inducer of pro-inflammatory cytokine and chemokine expression, including enhancement of IL6, CXCL10 (IP-10), CCL3 (MIP-1alpha), CCL4 (MIP-1beta), and TNF (TNF-alpha) expression in human primary monocytes, the production of which is mediated by STAT1, STAT3, and NF-kappaB activation.
22826	IL27	9606	22156348	IL27 priming results in enhanced LPS-induced proinflammatory response in human primary monocytes, specifically increasing expression of IL6, TNF, CCL3, and CCL4.
22826	IL27	9606	23557795	IL27 reduces vacuolar ATPase levels to inhibit phagosome acidification in macrophages.
127561	MIR15B	9606	23580661	Circulating MIR15B activates natural killer cells via the TLR1 signalling pathway.
195566	Lgr4	10090	23589304	Lgr4 deletion potentiates TLR2/4-mediated cytokine production and Lgr4 null mice are more susceptible to septic shock.
65161	TNFSF10	9606	23498957	TNFSF10 is targeted by human cytomegalovirus glycoprotein to protect infected cells from natural killer cell cytotoxicity.
197968	Ppp1cc	10090	23499489	PPP1CC dephosphorylates RNA sensors, RIG-I (DDX58) and MDA5 (IFIH1), to induce anti-viral IFNB production.
57303	PPP1CC	9606	23499489	PPP1CC dephosphorylates RNA sensors, RIG-I (DDX58) and MDA5 (IFIH1), to induce anti-viral IFNB production.
129195	Ppp1ca	10090	23499489	PPP1CA dephosphorylates RNA sensors, RIG-I (DDX58) and MDA5 (IFIH1), to induce anti-viral IFNB production.
60210	PPP1CA	9606	18949366	PPP1CA positively regulates the TNF-alpha-induced NF-kappaB pathway at the level of IKK activation.
60210	PPP1CA	9606	23499489	PPP1CA dephosphorylates RNA sensors, RIG-I (DDX58) and MDA5 (IFIH1), to induce anti-viral IFNB production.
221154	Mir203	10090	23522925	Mir203 post-transcriptionally downregulates Myd88 to inhibit the TLR signalling pathway in macrophages.
170702	Psmb8	10090	23527234	PSMB8 (LMP7) inhibits phagocytosis and enhances susceptibility of red blood cells to malarial parasites.
127401	MIR517C	9606	23448136	MIR517C activates NF-kB signalling and directly targets TNIP1 mRNA to promote apoptosis.
127271	MIR517A	9606	23448136	MIR517A activates NF-kB signalling and directly targets TNIP1mRNA to promote apoptosis.
162815	Ifne	10090	23449591	IFNE is constitutively expressed by epithelial cells of the female reproductive tract to confer protection against sexually transmitted infections.
172875	Csf2	10090	23453633	CSF2 is a negative regulator of IL21-mediated apoptosis in conventional dendritic cells.
140267	Il21	10090	23453633	IL21 induces apoptosis of conventional dendritic cells.
776557	IKBKE	9606	17003035	IKBKE interacts with NKFB2 (p52) and promotes transactivation via RELA (p65)-regulation of the alternative NF-kappaB activation pathway involving p52 and p65.
776557	IKBKE	9606	10421793	IKBKE is an IkappaB kinase that is expressed mainly in immune cells, and is induced in response to pro-inflammatory cytokines such as tumour necrosis factor (TNF)-alpha, IL-1-beta and IL-6, in addition to LPS.
776557	IKBKE	9606	12692549	IKBKE and TBK1 have a pivotal role in coordinating the activation of IRF3 and NF-kappaB in the innate immune response.
776557	IKBKE	9606	21138416	IKBKE and other IKK kinases regulate each other by an intricate network involving phosphorylation of their catalytic and regulatory (NEMO, TANK) subunits to balance their activities during innate immunity.
776557	IKBKE	9606	21822257	IKBKE kinase modulates IL-17 signalling through TRAF3IP2 adaptor protein phosphorylation, resulting in the induction of neutrophilia and pulmonary inflammation. (Demonstrated in mouse)
776557	IKBKE	9606	22065572	IKBKE is an important signalling molecule in the IFN pathway and is necessary to mount anti-viral immunity against West Nile virus. (Demonstrated in mice)
776557	IKBKE	9606	22171011	IKBKE plays a critical role in regulating the balance between the type I and type II interferon (IFN) signalling pathways.
776557	IKBKE	9606	22532683	IKBKE is sequestered by arenavirus nucleoproteins to block its autocatalytic activity and its ability to active IRF3.
776557	IKBKE	9606	23453969	IKBKE is poly-ubiquitinated at Lys30 and 401 to promote NF-kB activation in macrophages stimulated with TNFA and IL1B.
[truncated: 1,716 more rows]

## Sheet: Table S2b
Table S2b: Immune genes obtained from ImmPort
Symbol	ID	Name	Synonyms	Chromosome	Category
AZGP1	563	alpha-2-glycoprotein 1, zinc-binding	ZA2G|ZAG	7	Antigen_Processing_and_Presentation
B2M	567	beta-2-microglobulin	IMD43	15	Antigen_Processing_and_Presentation
CALR	811	calreticulin	CRT|HEL-S-99n|RO|SSA|cC1qR	19	Antigen_Processing_and_Presentation
CANX	821	calnexin	CNX|IP90|P90	5	Antigen_Processing_and_Presentation
CD1A	909	CD1a molecule	CD1|FCB6|HTA1|R4|T6	1	Antigen_Processing_and_Presentation
CD1B	910	CD1b molecule	CD1|CD1A|R1	1	Antigen_Processing_and_Presentation
CD1C	911	CD1c molecule	BDCA1|CD1|CD1A|R7	1	Antigen_Processing_and_Presentation
CD1D	912	CD1d molecule	CD1A|R3|R3G1	1	Antigen_Processing_and_Presentation
CD1E	913	CD1e molecule	CD1A|R2	1	Antigen_Processing_and_Presentation
CD4	920	CD4 molecule	CD4mut	12	Antigen_Processing_and_Presentation
CD8A	925	CD8a molecule	CD8|Leu2|p32	2	Antigen_Processing_and_Presentation
CD8B	926	CD8b molecule	CD8B1|LEU2|LY3|LYT3|P37	2	Antigen_Processing_and_Presentation
CD74	972	CD74 molecule	DHLAG|HLADG|II|Ia-GAMMA|p33	5	Antigen_Processing_and_Presentation
CREB1	1385	cAMP responsive element binding protein 1	CREB|CREB-1	2	Antigen_Processing_and_Presentation
CTSB	1508	cathepsin B	APPS|CPSB|RECEUP	8	Antigen_Processing_and_Presentation
CTSE	1510	cathepsin E	CATE	1	Antigen_Processing_and_Presentation
CTSL	1514	cathepsin L	CATL|CTSL1|MEP	9	Antigen_Processing_and_Presentation
CTSS	1520	cathepsin S	-	1	Antigen_Processing_and_Presentation
FCER1G	2207	Fc fragment of IgE receptor Ig	FCRG	1	Antigen_Processing_and_Presentation
[truncated: 2,464 more rows]

## Sheet: Table S2c
Table S2c: Concatenated immune genes of InnateDB and ImmPort
Id2
Iltifb
PRKRA
DDX3X
DDX58
MIR136
Mir146
[truncated: 2,653 more rows]
